# Supplementary material for: Inter-organ Wingless/Ror/Akt signaling regulates nutrient-dependent hyperarborization of somatosensory neurons
Source: eLife. 2023 Jan 17;12:e79461. doi: 10.7554/eLife.79461 (PMC9844989; doi:10.7554/eLife.79461)
Supplement: Supplementary file 1. [file elife-79461-supp1.xlsx]

## Sheet: diet_composition
HYD（200ml）				LYD（200ml）				HYD + sucrose （200ml）				LYD + peptone （200ml）				LYD + EAA （200ml）				LYD + 1x AA （200ml）				LYD + 3x AA (200ml)				LYD + VMCO (200ml)				LYD + VMC (200ml)				LYD + MCO (200ml)				LYD + VCO (200ml)				LYD + VMO (200ml)				LYD + VMCO + 1x AA （200ml）
Agar (g)	2	g		Agar (g)	2	g		Agar (g)	2	g		Agar (g)	2	g		Agar (g)	2	g		Agar (g)	2	g		Agar (g)	2	g		Agar (g)	2	g		Agar (g)	2	g		Agar (g)	2	g		Agar (g)	2	g		Agar (g)	2	g		Agar (g)	2
Brewer's Yeast (g)	12.8	g		Brewer's Yeast (g)	2.4	g		Brewer's Yeast (g)	12.8	g		Brewer's Yeast (g)	2.4	g		Brewer's Yeast (g)	2.4	g		Brewer's Yeast (g)	2.4	g		Brewer's Yeast (g)	2.4	g		Brewer's Yeast (g)	2.4	g		Brewer's Yeast (g)	2.4	g		Brewer's Yeast (g)	2.4	g		Brewer's Yeast (g)	2.4	g		Brewer's Yeast (g)	2.4	g		Brewer's Yeast (g)	2.4
Yeast Extract (g)	3.2	g		Yeast Extract (g)	0.6	g		Yeast Extract (g)	3.2	g		Yeast Extract (g)	0.6	g		Yeast Extract (g)	0.6	g		Yeast Extract (g)	0.6	g		Yeast Extract (g)	0.6	g		Yeast Extract (g)	0.6	g		Yeast Extract (g)	0.6	g		Yeast Extract (g)	0.6	g		Yeast Extract (g)	0.6	g		Yeast Extract (g)	0.6	g		Yeast Extract (g)	0.6
Peptone (g)	3.2	g		Peptone (g)	0.6	g		Peptone (g)	3.2	g		Peptone (g)	11.5	g		Peptone (g)	0.6	g		Peptone (g)	0.6	g		Peptone (g)	0.6	g		Peptone (g)	0.6	g		Peptone (g)	0.6	g		Peptone (g)	0.6	g		Peptone (g)	0.6	g		Peptone (g)	0.6	g		Peptone (g)	0.6
Sucrose (g)	5.4	g		Sucrose (g)	5.4	g		Sucrose (g)	43.9	g		Sucrose (g)	5.4	g		Sucrose (g)	5.4	g		Sucrose (g)	5.4	g		Sucrose (g)	5.4	g		Sucrose (g)	5.4	g		Sucrose (g)	5.4	g		Sucrose (g)	5.4	g		Sucrose (g)	5.4	g		Sucrose (g)	5.4	g		Sucrose (g)	5.4
Glucose (g)	10.8	g		Glucose (g)	10.8	g		Glucose (g)	10.8	g		Glucose (g)	10.8	g		Glucose (g)	10.8	g		Glucose (g)	10.8	g		Glucose (g)	10.8	g		Glucose (g)	10.8	g		Glucose (g)	10.8	g		Glucose (g)	10.8	g		Glucose (g)	10.8	g		Glucose (g)	10.8	g		Glucose (g)	10.8
1M MgSO4 x 6H2O (μl)	0.4	ml		1M MgSO4 x 6H2O (μl)	0.4	ml		1M MgSO4 x 6H2O (μl)	0.4	ml		1M MgSO4 x 6H2O (μl)	0.4	ml		1M MgSO4 x 6H2O (μl)	0.4	ml		1M MgSO4 x 6H2O (μl)	0.4	ml		1M MgSO4 x 6H2O (μl)	0.4	ml		1M MgSO4 x 6H2O (μl)	0.4	ml		1M MgSO4 x 6H2O (μl)	0.4	ml		1M MgSO4 x 6H2O (μl)	0.4	ml		1M MgSO4 x 6H2O (μl)	0.4	ml		1M MgSO4 x 6H2O (μl)	0.4	ml		1M MgSO4 x 6H2O (μl)	0.4
1M CaCl2 x 2H2O (μl)	0.68	ml		1M CaCl2 x 2H2O (μl)	0.68	ml		1M CaCl2 x 2H2O (μl)	0.68	ml		1M CaCl2 x 2H2O (μl)	0.68	ml		1M CaCl2 x 2H2O (μl)	0.68	ml		1M CaCl2 x 2H2O (μl)	0.68	ml		1M CaCl2 x 2H2O (μl)	0.68	ml		1M CaCl2 x 2H2O (μl)	0.68	ml		1M CaCl2 x 2H2O (μl)	0.68	ml		1M CaCl2 x 2H2O (μl)	0.68	ml		1M CaCl2 x 2H2O (μl)	0.68	ml		1M CaCl2 x 2H2O (μl)	0.68	ml		1M CaCl2 x 2H2O (μl)	0.68
Propionic acid (ml)	1.2	ml		Propionic acid (ml)	1.2	ml		Propionic acid (ml)	1.2	ml		Propionic acid (ml)	1.2	ml		Propionic acid (ml)	1.2	ml		Propionic acid (ml)	1.2	ml		Propionic acid (ml)	1.2	ml		Propionic acid (ml)	1.2	ml		Propionic acid (ml)	1.2	ml		Propionic acid (ml)	1.2	ml		Propionic acid (ml)	1.2	ml		Propionic acid (ml)	1.2	ml		Propionic acid (ml)	1.2
10% Butyl p-Hydroxybenzoate in 70% ethanol (ml)	2	ml		10% Butyl p-Hydroxybenzoate in 70% ethanol (ml)	2	ml		10% Butyl p-Hydroxybenzoate in 70% ethanol (ml)	2	ml		10% Butyl p-Hydroxybenzoate in 70% ethanol (ml)	2	ml		10% Butyl p-Hydroxybenzoate in 70% ethanol (ml)	2	ml		10% Butyl p-Hydroxybenzoate in 70% ethanol (ml)	2	ml		10% Butyl p-Hydroxybenzoate in 70% ethanol (ml)	2	ml		10% Butyl p-Hydroxybenzoate in 70% ethanol (ml)	2	ml		10% Butyl p-Hydroxybenzoate in 70% ethanol (ml)	2	ml		10% Butyl p-Hydroxybenzoate in 70% ethanol (ml)	2	ml		10% Butyl p-Hydroxybenzoate in 70% ethanol (ml)	2	ml		10% Butyl p-Hydroxybenzoate in 70% ethanol (ml)	2	ml		10% Butyl p-Hydroxybenzoate in 70% ethanol (ml)	2
																50x MEM Essential Amino Acids Solution	40	ml		cholesterol		ml		cholesterol		ml		cholesterol	30	ml		cholesterol	30	ml		cholesterol	30	ml		cholesterol	30	ml		cholesterol		ml		cholesterol	30
																				CaCl2		ml		CaCl2		ml		CaCl2	2	ml		CaCl2	2	ml		CaCl2	2	ml		CaCl2		ml		CaCl2	2	ml		CaCl2	2
																				MgSO4		ml		MgSO4		ml		MgSO4	2	ml		MgSO4	2	ml		MgSO4	2	ml		MgSO4		ml		MgSO4	2	ml		MgSO4	2
																				CuSO4		ml		CuSO4		ml		CuSO4	2	ml		CuSO4	2	ml		CuSO4	2	ml		CuSO4		ml		CuSO4	2	ml		CuSO4	2
																				FeSO4		ml		FeSO4		ml		FeSO4	2	ml		FeSO4	2	ml		FeSO4	2	ml		FeSO4		ml		FeSO4	2	ml		FeSO4	2
																				MnCl2		ml		MnCl2		ml		MnCl2	2	ml		MnCl2	2	ml		MnCl2	2	ml		MnCl2		ml		MnCl2	2	ml		MnCl2	2
																				ZnSO4		ml		ZnSO4		ml		ZnSO4	2	ml		ZnSO4	2	ml		ZnSO4	2	ml		ZnSO4		ml		ZnSO4	2	ml		ZnSO4	2
																				ile	0.224403	g		ile	0.673208	g		ile		g		ile		g		ile		g		ile		g		ile		g		ile	0.224403
																				leu	0.406731	g		leu	1.22019	g		leu		g		leu		g		leu		g		leu		g		leu		g		leu	0.406731
																				tyr	0.185752	g		tyr	0.557255	g		tyr		g		tyr		g		tyr		g		tyr		g		tyr		g		tyr	0.185752
																				EAA	12.102	ml		EAA	36.306	ml		EAA		ml		EAA		ml		EAA		ml		EAA		ml		EAA		ml		EAA	12.102
																				NEAA (w/o cys)	12.102	ml		NEAA (w/o cys)	36.306	ml		NEAA (w/o cys)		ml		NEAA (w/o cys)		ml		NEAA (w/o cys)		ml		NEAA (w/o cys)		ml		NEAA (w/o cys)		ml		NEAA (w/o cys)	12.102
																				glutamate (100mg/ml)	3.03758	ml		glutamate (100mg/ml)	9.11275	ml		glutamate (100mg/ml)		ml		glutamate (100mg/ml)		ml		glutamate (100mg/ml)		ml		glutamate (100mg/ml)		ml		glutamate (100mg/ml)		ml		glutamate (100mg/ml)	3.03758
																				cys (50mg/ml)	1.36518	ml		cys (50mg/ml)	4.09554	ml		cys (50mg/ml)		ml		cys (50mg/ml)		ml		cys (50mg/ml)		ml		cys (50mg/ml)		ml		cys (50mg/ml)		ml		cys (50mg/ml)	1.36518
																				vit		ml		vit		ml		vit	42	ml		vit	42	ml		vit		ml		vit	42	ml		vit	42	ml		vit	42
																				nucl/lipid soln		ml		nucl/lipid soln		ml		nucl/lipid soln	16	ml		nucl/lipid soln		ml		nucl/lipid soln	16	ml		nucl/lipid soln	16	ml		nucl/lipid soln	16	ml		nucl/lipid soln	16
																				folic acid		ml		folic acid		ml		folic acid	2	ml		folic acid	2	ml		folic acid		ml		folic acid	2	ml		folic acid	2	ml		folic acid	2
[truncated: 1 more columns]
