# Supplementary material for: Inter-organ Wingless/Ror/Akt signaling regulates nutrient-dependent hyperarborization of somatosensory neurons
Source: eLife. 2023 Jan 17;12:e79461. doi: 10.7554/eLife.79461 (PMC9844989; doi:10.7554/eLife.79461)
Supplement: Supplementary file 2. [file elife-79461-supp2.xlsx]

## Sheet: Sheet1 (4)
	Knocked down gene	Symbol	Stock center	Stock number	Blunting of the hyperarborization by knockdown using ppk-GAL4 and Gr28b.c-GAL4	Blunting of the hyperarborization by knockdown using ppk-GAL4
	RTK-like orphan receptor	Ror	NIG	4926R-1	B	B
	Insulin-like receptor	InR	BDSC	31594	N	-
			BDSC	51518	-	B
	Anaplastic lymphoma kinase	Alk	VDRC	11446	B	N
			VDRC	107083	-	N
	heartless	htl	VDRC	6692	B	*2
			BDSC	35024	-	N
	Epidermal growth factor receptor	Egfr	VDRC	43267	B	N
	PDGF- and VEGF-receptor related	Pvr	VDRC	13502	B	N
	Discoidin domain receptor	Ddr	VDRC	29720	S	N
	doughnut on 2	dnt	NIG	17559R-3	S	N
	derailed	drl	BDSC	29602	S	N
	Eph receptor tyrosine kinase	Eph	BDSC	28511	N	-
	off-track	otk	BDSC	25790	N	-
	sevenless	sev	BDSC	31274	N	-
	breathless	btl	VDRC	110277	N	-
	Cadherin 96Ca	Cad96Ca	VDRC	1089	N	-
	CG10702	CG10702	VDRC	27052	N	-
	Derailed 2	Drl-2	VDRC	40484	N	-
	Neurospecific receptor kinase	Nrk	VDRC	9653	N	-
	Ret oncogene	Ret	VDRC	107648	*1	-
	torso	tor	VDRC	36280	N	-
	Tie-like receptor tyrosine kinase	Tie	VDRC	26879	N	-
	B: Blunting, S: Slight blunting, N: No change, -: Not examined
	*1: Abnormal dendrite morphology, *2: Decrease on LYD and inrease on HYD in terminal density
