# Supplementary material for: Inter-organ Wingless/Ror/Akt signaling regulates nutrient-dependent hyperarborization of somatosensory neurons
Source: eLife. 2023 Jan 17;12:e79461. doi: 10.7554/eLife.79461 (PMC9844989; doi:10.7554/eLife.79461)
Supplement: Supplementary file 3. — (A) List of Differentially expressed genes between HYD and LYD in whole larval bodies at the wandering third-instar stage (adjusted P value < 0.05). (B and C) List of functional annotation clusters that were significantly enriched (enrichment score ≥ 1.3) in genes highly expressed on HYD rather than on LYD (B) or genes highly 1385 expressed on LYD rather than on HYD (C). [file elife-79461-supp3.xlsx]

## Sheet: (A)Gene list
Supplementary file 3.
(A) Differentially expressed genes between HYD and LYD in whole larval bodies at the wandering third-instar stage
FlyBase ID	Symbol	Gene name	log2(LYD/HYD)	P value	adjusted P value
FBgn0000008	a	arc	-0.465683	0.0143713	0.0443786
FBgn0000014	abd-A	abdominal A	-0.381758	0.00429121	0.0157174
FBgn0000024	Ace	Acetylcholine esterase	-0.424105	0.000777196	0.00349618
FBgn0000044	Act57B	Actin 57B	0.943353	2.74954e-06	2.14567e-05
FBgn0000046	Act87E	Actin 87E	0.830699	9.50397e-07	8.26966e-06
FBgn0000052	ade2	adenosine 2	-0.965446	3.36247e-12	1.03095e-10
FBgn0000053	ade3	adenosine 3	-1.3176	4.58585e-15	2.34341e-13
FBgn0000071	Ama	Amalgam	-1.23094	1.09008e-17	8.30097e-16
FBgn0000078	Amy-d	Amylase distal	-1.10259	4.14028e-09	6.07537e-08
FBgn0000079	Amy-p	Amylase proximal	-0.91711	2.16436e-07	2.15898e-06
FBgn0000114	aret	arrest	0.564595	1.02183e-05	7.0404e-05
FBgn0000120	Arr1	Arrestin 1	1.02766	3.88562e-08	4.52261e-07
FBgn0000146	aub	aubergine	-0.747698	1.54833e-05	0.000102678
FBgn0000241	bw	brown	-1.08035	2.1294e-09	3.30354e-08
FBgn0000244	by	blistery	0.508455	1.08733e-05	7.4696e-05
FBgn0000256	capu	cappuccino	0.487319	2.35445e-05	0.000150229
FBgn0000261	Cat	Catalase	-0.657061	2.29766e-05	0.000146927
FBgn0000274	Pka-C2	cAMP-dependent protein kinase 2	0.787507	4.06457e-07	3.84385e-06
FBgn0000286	Cf2	Chorion factor 2	-0.346432	0.00190447	0.00775569
FBgn0000299	Cg25C	Collagen type IV	-0.453685	0.00152896	0.00636668
FBgn0000339	cni	cornichon	-0.46646	5.44185e-05	0.000320541
FBgn0000406	Cyt-b5-r	Cytochrome b5-related	-0.357075	0.00958282	0.0314328
FBgn0000422	Ddc	Dopa decarboxylase	-1.15765	2.2417e-10	4.50058e-09
FBgn0000442	Pkg21D	cGMP-dependent protein kinase 21D	0.738374	9.34214e-06	6.49048e-05
FBgn0000447	Dhod	Dihydroorotate dehydrogenase	0.269232	0.0119656	0.0381008
FBgn0000448	Hr46	Hormone receptor-like in 46	-0.839642	0.00162808	0.00674325
FBgn0000449	dib	disembodied	-1.07524	3.64328e-06	2.75278e-05
FBgn0000454	Dip-B	Dipeptidase B	-0.681614	3.11576e-07	2.99272e-06
FBgn0000455	Dip-C	Dipeptidase C	-0.297134	0.00932355	0.0306514
FBgn0000473	Cyp6a2	Cytochrome P450-6a2	0.990891	0.000108355	0.000590754
FBgn0000543	ecd	ecdysoneless	-0.320377	0.00401178	0.0148009
FBgn0000565	Eip71CD	Ecdysone-induced protein 28/29kD	-1.09522	7.96949e-15	3.89374e-13
FBgn0000566	Eip55E	Eip55E	-0.931817	4.78495e-11	1.15663e-09
FBgn0000568	Eip75B	Ecdysone-induced protein 75B	-0.446049	0.00273761	0.0106214
FBgn0000578	ena	enabled	-0.39632	0.0038407	0.0142555
FBgn0000594	Est-P	Esterase P	-1.19227	1.15814e-20	1.16323e-18
FBgn0000639	Fbp1	Fat body protein 1	-0.852269	0.000703452	0.00319404
FBgn0000640	Fbp2	Fat body protein 2	-1.27216	6.4696e-10	1.15965e-08
FBgn0000644	Fcp3C	Follicle cell protein 3C	-0.825975	0.00790227	0.0265866
FBgn0000719	fog	folded gastrulation	-0.377168	0.000316522	0.00155866
FBgn0000721	for	foraging	-0.389311	0.00391617	0.0144894
FBgn0000723	FER	FER ortholog (H. sapiens)	-0.314355	0.00541972	0.0192751
FBgn0001078	ftz-f1	ftz transcription factor 1	0.589508	0.00189443	0.00772287
FBgn0001089	Gal	beta galactosidase	-1.01866	8.04993e-13	2.79136e-11
FBgn0001099	gdl	gonadal	0.737197	0.00317776	0.0121033
FBgn0001112	Gld	Glucose dehydrogenase	-0.519179	0.000654326	0.00301088
FBgn0001114	Glt	Glutactin	-0.350273	0.0143115	0.0442172
FBgn0001125	Got2	Glutamate oxaloacetate transaminase 2	-0.486878	7.79694e-05	0.000439488
FBgn0001128	Gpdh	Glycerol 3 phosphate dehydrogenase	0.889256	1.87389e-06	1.52357e-05
FBgn0001142	Gs1	Glutamine synthetase 1	-0.554885	0.00101391	0.00442105
FBgn0001149	GstD1	Glutathione S transferase D1	-0.665096	2.73929e-06	2.13911e-05
FBgn0001179	hay	haywire	-0.314167	0.00878432	0.0291418
FBgn0001208	Hn	Henna	-0.876339	8.10965e-10	1.41657e-08
FBgn0001216	Hsc70-1	Heat shock protein cognate 1	1.0634	1.48835e-11	4.01406e-10
FBgn0001217	Hsc70-2	Heat shock protein cognate 2	0.634015	6.71862e-08	7.47647e-07
FBgn0001224	Hsp23	Heat shock protein 23	-1.20952	6.77039e-09	9.40188e-08
FBgn0001225	Hsp26	Heat shock protein 26	-0.97439	1.20369e-08	1.59185e-07
FBgn0001226	Hsp27	Heat shock protein 27	-0.887377	1.01056e-06	8.76128e-06
FBgn0001227	Hsp67Ba	Heat shock gene 67Ba	-0.538496	1.93731e-05	0.000125189
FBgn0001229	Hsp67Bc	Heat shock gene 67Bc	-1.1736	4.86607e-16	2.9224e-14
FBgn0001230	Hsp68	Heat shock protein 68	-0.606722	1.7845e-06	1.46211e-05
FBgn0001234	Hsromega	Heat shock RNA omega	-0.45886	0.000293605	0.00145442
FBgn0001253	ImpE1	Ecdysone-inducible gene E1	-0.584207	0.00429929	0.0157321
FBgn0001254	ImpE2	Ecdysone-inducible gene E2	-1.0081	2.77784e-06	2.16341e-05
FBgn0001255	ImpE3	Ecdysone-inducible gene E3	-1.10977	2.0241e-17	1.4832e-15
FBgn0001256	ImpL1	Ecdysone-inducible gene L1	-1.69591	1.38418e-07	1.43992e-06
FBgn0001281	janB	janus B	0.849636	1.6622e-10	3.45826e-09
FBgn0001285	Jon44E	Jonah 44E	-1.15029	1.03145e-11	2.90275e-10
FBgn0001301	kel	kelch	-0.862609	6.8892e-09	9.54413e-08
FBgn0001313	kl-2	male fertility factor kl2	1.05886	1.4913e-08	1.94136e-07
FBgn0001320	kni	knirps	-0.406621	0.00617566	0.0215909
FBgn0001321	knk	knickkopf	-0.289698	0.0130146	0.0408605
FBgn0001325	Kr	Kruppel	-0.330095	0.0133961	0.0419226
FBgn0001404	egh	egghead	-0.376558	0.00209344	0.00840187
FBgn0001565	Hlc	Helicase	-0.336199	0.00242227	0.00953118
FBgn0001941	ifc	infertile crescent	0.476594	0.00034141	0.00166923
FBgn0001967	NimC3	Nimrod C3	-0.594532	6.98181e-05	0.000397581
FBgn0001977	CIAPIN1	CIAPIN1 ortholog	-0.552973	8.69513e-07	7.61134e-06
FBgn0002036	CG10561	-	0.54819	1.48444e-05	9.88701e-05
FBgn0002174	l(2)tid	lethal (2) tumorous imaginal discs	0.320774	0.00296376	0.011385
FBgn0002440	l(3)mbn	lethal (3) malignant blood neoplasm	1.59013	1.00842e-10	2.20848e-09
FBgn0002522	lab	labial	0.862647	0.000398843	0.00192388
FBgn0002534	Lcp3	Larval cuticle protein 3	1.70383	7.55438e-15	3.74536e-13
FBgn0002562	Lsp1alpha	Larval serum protein 1 alpha	-0.603824	0.0125369	0.0395953
FBgn0002563	Lsp1beta	Larval serum protein 1 beta	1.03743	5.41732e-05	0.000319258
FBgn0002564	Lsp1gamma	Larval serum protein 1 gamma	1.16827	6.29732e-06	4.55749e-05
FBgn0002567	ltd	lightoid	-0.421901	0.000702038	0.00318887
FBgn0002569	Mal-A2	Maltase A2	1.4057	2.2443e-10	4.50058e-09
FBgn0002570	Mal-A1	Maltase A1	1.30559	1.56175e-08	2.02854e-07
FBgn0002571	Mal-A3	Maltase A3	1.84434	2.67123e-10	5.28396e-09
FBgn0002573	sens	senseless	0.568344	0.00358155	0.0134435
FBgn0002577	m	miniature	-0.716171	0.00733774	0.0250123
FBgn0002578	Kaz-m1	Kazal-type protease inhibitor m1	1.16611	9.70652e-18	7.44017e-16
FBgn0002592	E(spl)m2-BFM	Enhancer of split m2, Bearded family member	-0.487105	0.000908539	0.00401265
FBgn0002673	twe	twine	0.578929	3.48887e-06	2.65158e-05
FBgn0002715	mei-S332	meiotic from via Salaria 332	0.525425	8.71103e-05	0.000485465
FBgn0002716	mei-W68	meiotic W68	-0.730067	0.00270314	0.0105086
FBgn0002732	E(spl)malpha-BFM	Enhancer of split malpha, Bearded family member	-0.434752	0.000418701	0.00201091
FBgn0002733	E(spl)mbeta-HLH	Enhancer of split mbeta, helix-loop-helix	-0.43021	0.000239246	0.00121035
FBgn0002772	Mlc1	Myosin alkali light chain 1	0.449068	0.00810605	0.027178
FBgn0002773	Mlc2	Myosin light chain 2	0.708353	0.000711403	0.00322512
FBgn0002787	Rpn8	Regulatory particle non-ATPase 8	-0.319358	0.0138305	0.0429589
FBgn0002789	Mp20	Muscle protein 20	0.459577	0.00186134	0.0076066
FBgn0002862	Mst87F	Male-specific RNA 87F	0.801584	7.7874e-11	1.76864e-09
FBgn0002863	Acp95EF	Accessory gland protein 95EF	1.21334	4.91349e-05	0.000292226
FBgn0002865	Mst98Ca	Male-specific RNA 98Ca	0.847536	4.11931e-11	1.0104e-09
FBgn0002868	MtnA	Metallothionein A	-0.334689	0.014982	0.0460205
FBgn0002930	nec	necrotic	-0.453213	3.26423e-05	0.00020316
FBgn0002939	ninaD	neither inactivation nor afterpotential D	1.73359	2.96496e-14	1.30358e-12
FBgn0003008	or	orange	-0.312628	0.0110335	0.0355605
FBgn0003016	osp	outspread	-0.391372	0.00124509	0.00529825
FBgn0003046	Pcp	Pupal cuticle protein	-1.39463	6.73969e-17	4.6464e-15
FBgn0003060	CG9757	-	0.974289	2.61995e-07	2.55653e-06
FBgn0003071	Pfk	Phosphofructokinase	0.44341	0.000640954	0.00295519
FBgn0003074	Pgi	Phosphoglucose isomerase	0.374429	0.0111848	0.0359486
FBgn0003076	Pgm	phosphoglucose mutase	-0.381655	0.0119576	0.0380858
FBgn0003086	Pig1	Pre-intermoult gene 1	0.376566	0.00191508	0.00779071
FBgn0003087	pim	pimples	0.306839	0.0156954	0.0478709
FBgn0003117	pnr	pannier	-0.858519	1.1306e-09	1.87912e-08
FBgn0003140	PpY-55A	Protein phosphatase Y at 55A	0.558501	0.00718583	0.024588
FBgn0003141	pr	purple	-0.338142	0.00987277	0.0322749
FBgn0003149	Prm	Paramyosin	0.585064	0.00045046	0.00214655
FBgn0003162	Pu	Punch	-1.30402	9.66823e-13	3.30336e-11
FBgn0003165	pum	pumilio	-0.372501	0.0067042	0.0231645
FBgn0003187	qua	quail	0.724145	1.40372e-08	1.83691e-07
FBgn0003204	ras	raspberry	-0.711993	2.60841e-07	2.54846e-06
FBgn0003206	Ras64B	Ras oncogene at 64B	-0.280853	0.0111321	0.0358089
FBgn0003231	ref(2)P	refractory to sigma P	0.78098	1.98583e-07	1.99456e-06
FBgn0003302	rux	roughex	0.324268	0.0108422	0.0350604
FBgn0003308	ry	rosy	-0.665813	1.31097e-07	1.36865e-06
FBgn0003312	sad	shadow	-0.625639	7.05005e-08	7.80799e-07
FBgn0003319	Sb	Stubble	-0.603478	3.25777e-05	0.000202866
FBgn0003358	Jon99Ci	Jonah 99Ci	-1.57488	1.86755e-18	1.5542e-16
FBgn0003366	sev	sevenless	-0.401356	0.00216239	0.00864041
FBgn0003372	Sgs1	Salivary gland secretion 1	1.06112	1.37189e-05	9.20733e-05
FBgn0003373	Sgs3	Salivary gland secretion 3	-0.692069	0.00159614	0.00662038
FBgn0003374	Sgs4	Salivary gland secretion 4	-0.646485	0.00101105	0.00441189
FBgn0003377	Sgs7	Salivary gland secretion 7	-0.798986	0.000119574	0.000643195
FBgn0003378	Sgs8	Salivary gland secretion 8	-0.928287	1.01978e-06	8.83379e-06
FBgn0003386	Shaw	Shaker cognate w	0.502646	0.000199808	0.00102689
FBgn0003388	shd	shade	-0.374204	0.00229795	0.00911592
FBgn0003390	shf	shifted	-0.4403	0.000547026	0.00256372
FBgn0003447	sn	singed	-0.541	0.000225397	0.00114328
FBgn0003475	spir	spire	0.309348	0.00560372	0.0198628
FBgn0003495	spz	spatzle	-1.01705	1.76359e-16	1.12282e-14
FBgn0003507	srp	serpent	-0.542872	1.05698e-06	9.12891e-06
FBgn0003651	svp	seven up	-0.363677	0.0011585	0.00497704
FBgn0003716	tkv	thickveins	-0.300407	0.0155194	0.0474336
FBgn0003719	tld	tolloid	-0.531794	3.65065e-05	0.000225285
FBgn0003744	trc	tricornered	-0.328332	0.00254605	0.00996106
FBgn0003748	Treh	Trehalase	-0.402544	0.00283118	0.0109407
FBgn0003863	alphaTry	alphaTrypsin	0.613325	0.00109996	0.00475712
FBgn0003882	tub	tube	-0.297112	0.00813615	0.0272554
FBgn0003885	alphaTub84D	alpha-Tubulin at 84D	0.300985	0.0059128	0.0207939
FBgn0003888	betaTub60D	beta-Tubulin at 60D	-0.575176	9.20743e-05	0.000510594
FBgn0003889	betaTub85D	beta-Tubulin at 85D	0.785732	1.12428e-07	1.1865e-06
FBgn0003890	betaTub97EF	beta-Tubulin at 97EF	0.34715	0.00903174	0.0298352
FBgn0003944	Ubx	Ultrabithorax	-0.332739	0.00629054	0.0219272
FBgn0003961	Uro	Urate oxidase	-1.09188	4.66118e-07	4.33765e-06
FBgn0003963	ush	u-shaped	-0.369975	0.00152267	0.00634502
FBgn0003997	hid	head involution defective	-0.4019	0.000897274	0.00396892
FBgn0004003	wbl	windbeutel	-0.73975	1.77744e-09	2.79851e-08
FBgn0004117	Tm2	Tropomyosin 2	0.525624	0.00136569	0.00576511
FBgn0004168	5-HT1A	5-hydroxytryptamine (serotonin) receptor 1A	0.608338	0.00297169	0.0114117
FBgn0004169	up	upheld	0.454048	0.013738	0.0427686
FBgn0004171	Mst98Cb	Male-specific RNA 98Cb	0.82852	2.65399e-12	8.31228e-11
FBgn0004172	Mst84Da	Male-specific RNA 84Da	0.779679	1.67496e-08	2.15397e-07
FBgn0004173	Mst84Db	Male-specific RNA 84Db	0.746415	1.77414e-09	2.7971e-08
FBgn0004174	Mst84Dc	Male-specific RNA 84Dc	0.889074	3.90334e-12	1.17273e-10
FBgn0004175	Mst84Dd	Male-specific RNA 84Dd	0.792247	5.39344e-09	7.66329e-08
FBgn0004228	mex1	midgut expression 1	1.00258	4.14208e-18	3.32823e-16
FBgn0004242	Syt1	Synaptotagmin 1	-0.403886	0.000266132	0.00132906
FBgn0004359	T48	Transcript 48	-0.369732	0.00371355	0.0138453
FBgn0004372	aly	always early	-0.47201	0.00377922	0.0140721
FBgn0004379	Klp67A	Kinesin-like protein at 67A	0.276688	0.0101667	0.0331427
FBgn0004387	Klp98A	Kinesin-like protein at 98A	-0.356774	0.00470633	0.0170185
FBgn0004429	LysP	Lysozyme P	-0.822025	0.00719965	0.0246136
FBgn0004431	LysX	Lysozyme X	0.906642	1.78472e-05	0.000116102
FBgn0004507	GlyP	Glycogen phosphorylase	0.644634	0.000114124	0.000617299
FBgn0004509	Fur1	Furin 1	-0.351743	0.00346584	0.0130597
FBgn0004511	dy	dusky	-0.66663	0.0145862	0.0448992
FBgn0004516	Gad1	Glutamic acid decarboxylase 1	0.498769	0.00407978	0.0150328
FBgn0004580	Cbp53E	Calbindin 53E	0.647701	1.17005e-06	9.97235e-06
FBgn0004588	Eig71Ea	Ecdysone-induced gene 71Ea	-3.99215	1.68186e-08	2.16045e-07
FBgn0004589	Eig71Eb	Ecdysone-induced gene 71Eb	-3.73725	3.4127e-06	2.60559e-05
FBgn0004590	Eig71Ec	Ecdysone-induced gene 71Ec	-6.42232	3.80731e-07	3.61524e-06
FBgn0004594	Eig71Eg	Ecdysone-induced gene 71Eg	-3.02816	2.80317e-28	4.24152e-26
FBgn0004606	zfh1	Zn finger homeodomain 1	-0.384908	0.00203685	0.00819737
FBgn0004644	hh	hedgehog	-0.313097	0.0124886	0.0394749
FBgn0004650	fs(1)N	female sterile (1) Nasrat	0.669297	4.27997e-05	0.000259313
FBgn0004652	fru	fruitless	0.962307	1.70383e-09	2.69719e-08
FBgn0004797	mdy	midway	-0.615335	1.75379e-08	2.23805e-07
FBgn0004852	Ac76E	Adenylyl cyclase 76E	0.599288	5.05886e-05	0.000299953
FBgn0004868	Gdi	GDP dissociation inhibitor	-0.351767	0.0133695	0.0418505
FBgn0004878	cas	castor	0.420884	0.0041089	0.0151114
FBgn0004882	orb	oo18 RNA-binding protein	0.680495	1.72237e-08	2.2052e-07
FBgn0004885	tok	tolkin	-0.729774	1.74372e-06	1.43475e-05
FBgn0004910	Eip63F-1	Ecdysone-induced protein 63F 1	-0.502081	1.5947e-05	0.000105263
FBgn0004919	gol	goliath	-0.409502	0.00111676	0.00482082
FBgn0004959	phm	phantom	-0.578549	5.71955e-07	5.21428e-06
FBgn0005564	Shal	Shaker cognate l	0.397264	0.00381065	0.0141801
FBgn0005586	Rab3	Rab3	0.316475	0.0138878	0.043091
FBgn0005592	btl	breathless	-0.556024	2.21751e-05	0.00014227
FBgn0005612	Sox14	Sox box protein 14	-0.406076	0.00433598	0.0158564
FBgn0005640	Eip63E	Ecdysone-induced protein 63E	-0.313852	0.00516144	0.0184636
FBgn0005666	bt	bent	0.427068	0.0164051	0.0497101
FBgn0005670	Cyp4d1	Cytochrome P450-4d1	0.768037	7.60795e-07	6.7407e-06
FBgn0005695	gcl	germ cell-less	-0.384693	0.0013692	0.00577571
FBgn0005778	PpD5	Protein phosphatase D5	0.625774	3.67511e-06	2.77323e-05
FBgn0005779	PpD6	Protein phosphatase D6	0.699634	0.000770699	0.00346963
FBgn0010052	Jhe	Juvenile hormone esterase	0.992403	0.000131267	0.000699949
FBgn0010222	Nmdmc	NAD-dependent methylenetetrahydrofolate dehydrogenase	-1.26149	1.60384e-24	2.14786e-22
FBgn0010223	Galphaf	G protein alpha f subunit	0.766099	2.17074e-07	2.1635e-06
FBgn0010225	Gel	Gelsolin	-0.569598	0.00043287	0.00207035
FBgn0010241	Mdr50	Multi drug resistance 50	0.538315	0.000698927	0.00318188
FBgn0010258	Rbp4	RNA-binding protein 4	-0.863225	1.86206e-09	2.9199e-08
FBgn0010294	ng2	new glue 2	2.16713	5.41035e-11	1.27705e-09
FBgn0010295	ng3	new glue 3	3.26514	5.79467e-23	7.03268e-21
FBgn0010329	Tbh	Tyramine beta hydroxylase	0.738331	0.00446238	0.0162676
FBgn0010356	Taf5	TBP-associated factor 5	-0.297367	0.014769	0.0454141
FBgn0010357	betaTry	betaTrypsin	0.96285	9.32712e-09	1.26655e-07
FBgn0010358	deltaTry	deltaTrypsin	1.04013	1.28716e-11	3.52864e-10
FBgn0010381	Drs	Drosomycin	-4.19816	6.47685e-34	1.23708e-31
FBgn0010383	Cyp18a1	Cytochrome P450-18a1	2.0305	0.000162825	0.000852232
FBgn0010387	Dbi	Diazepam-binding inhibitor	1.79265	8.55717e-20	8.04029e-18
FBgn0010388	Dro	Drosocin	-1.7343	0.000680929	0.0031124
FBgn0010395	Itgbn	Integrin betanu subunit	0.677127	5.64473e-09	7.96208e-08
FBgn0010398	Lrr47	Leucine-rich repeat 47	-0.326071	0.0122451	0.0388001
FBgn0010415	Sdc	Syndecan	-0.390001	0.0039998	0.0147708
FBgn0010417	Taf6	TBP-associated factor 6	-0.432352	7.30607e-05	0.000414023
FBgn0010425	epsilonTry	epsilonTrypsin	1.55247	7.54157e-16	4.37148e-14
FBgn0010441	pll	pelle	-0.585785	1.1429e-06	9.78442e-06
FBgn0010470	Fkbp14	FK506-binding protein 14 ortholog	-0.329049	0.0150547	0.0462095
FBgn0010504	kermit	kermit	0.326593	0.00404249	0.0149048
FBgn0010591	Sply	Sphingosine-1-phosphate lyase	-0.455059	0.00213403	0.00854711
FBgn0010905	Spn	Spinophilin	-0.313736	0.0109539	0.035343
FBgn0011206	bol	boule	0.689946	2.52291e-07	2.47636e-06
FBgn0011239	ms(2)35Ci	male sterile (2) 35Ci	0.649475	3.62202e-06	2.74205e-05
FBgn0011244	Hsp60B	Heat shock protein 60 related	0.945797	4.67252e-13	1.66568e-11
FBgn0011270	Pglym87	Pglym87	0.88443	8.74933e-11	1.97173e-09
FBgn0011286	RyR	Ryanodine receptor	1.18611	1.74814e-15	9.56222e-14
FBgn0011288	Snap25	Synaptosomal-associated protein 25kDa	0.387652	0.00587274	0.0206655
FBgn0011289	TfIIA-L	Transcription factor IIA L	-0.26	0.0151077	0.0463332
FBgn0011296	l(2)efl	lethal (2) essential for life	-0.57024	0.000172047	0.000896475
FBgn0011554	etaTry	etaTrypsin	0.594641	5.79041e-07	5.27475e-06
FBgn0011555	thetaTry	thetaTrypsin	1.61242	6.03983e-14	2.56825e-12
FBgn0011556	zetaTry	zetaTrypsin	0.772599	7.43949e-05	0.000420765
FBgn0011569	can	cannonball	-0.440572	0.0124046	0.0392413
FBgn0011589	Elk	Eag-like K[+] channel	-0.434823	0.0087298	0.0289775
FBgn0011596	fzo	fuzzy onions	0.683226	1.01728e-08	1.36705e-07
FBgn0011606	Klp3A	Kinesin-like protein at 3A	0.250231	0.0159371	0.0484432
FBgn0011642	Zyx	Zyxin	-0.275704	0.0118031	0.037676
FBgn0011666	msi	musashi	-0.386864	0.000882557	0.00391274
FBgn0011672	Mvl	Malvolio	-0.371846	0.00256837	0.0100417
FBgn0011676	Nos	Nitric oxide synthase	-0.835716	9.99589e-05	0.000551169
FBgn0011703	RnrL	Ribonucleoside diphosphate reductase large subunit	0.35035	0.00761121	0.025801
FBgn0011725	twin	twin	0.352052	0.00602549	0.0211243
FBgn0011740	alpha-Man-IIa	alpha-Mannosidase class II a	-0.291758	0.00683209	0.0235645
FBgn0011743	Arp53D	Actin-related protein 53D	0.609164	9.61245e-07	8.35158e-06
FBgn0011770	Gip	GIP-like	-0.329765	0.00502056	0.0179983
FBgn0011818	oaf	out at first	-0.341414	0.0012819	0.00544493
FBgn0011828	Pxn	Peroxidasin	-0.531462	0.000312761	0.00154079
FBgn0011834	Ser6	Serine protease 6	1.645	1.35438e-13	5.47911e-12
FBgn0012034	AcCoAS	Acetyl Coenzyme A synthase	0.387564	0.009984	0.0326019
FBgn0012036	Aldh	Aldehyde dehydrogenase	0.68899	9.57457e-07	8.32487e-06
FBgn0012037	Ance	Angiotensin converting enzyme	-0.535535	0.000467839	0.00222391
FBgn0013300	ProtA	Protamine A	0.850313	1.26882e-11	3.4948e-10
FBgn0013301	ProtB	Protamine B	0.949784	1.48417e-15	8.21576e-14
FBgn0013323	Ptth	Prothoracicotropic hormone	0.540325	0.00888591	0.0294035
FBgn0013347	TfIIA-S	Transcription-factor-IIA-S	-0.279446	0.0134826	0.0421542
FBgn0013672	mt:ATPase6	mitochondrial ATPase subunit 6	-0.506621	0.00306948	0.0117408
FBgn0013673	mt:ATPase8	mitochondrial ATPase subunit 8	-0.931228	0.00221043	0.00880168
FBgn0013675	mt:CoII	mitochondrial Cytochrome c oxidase subunit II	-0.505967	0.00382376	0.0142065
FBgn0013676	mt:CoIII	mitochondrial Cytochrome c oxidase subunit III	-0.514066	0.00901772	0.0297974
FBgn0013678	mt:Cyt-b	mitochondrial Cytochrome b	-0.463581	0.0135298	0.042273
FBgn0013679	mt:ND1	mitochondrial NADH-ubiquinone oxidoreductase chain 1	-0.436164	0.00447629	0.0163132
FBgn0013680	mt:ND2	mitochondrial NADH-ubiquinone oxidoreductase chain 2	-0.58	6.97829e-07	6.24935e-06
FBgn0013681	mt:ND3	mitochondrial NADH-ubiquinone oxidoreductase chain 3	-0.366495	0.00315699	0.0120478
FBgn0013684	mt:ND5	mitochondrial NADH-ubiquinone oxidoreductase chain 5	-0.463211	0.00571829	0.0202151
FBgn0013685	mt:ND6	mitochondrial NADH-ubiquinone oxidoreductase chain 6	-0.571173	8.23777e-06	5.77487e-05
FBgn0013688	mt:srRNA	mitochondrial small ribosomal RNA	-0.911218	1.26374e-17	9.49928e-16
FBgn0013717	not	non-stop	-0.466009	6.05435e-05	0.00035194
FBgn0013718	nuf	nuclear fallout	-0.339109	0.00741556	0.0252185
FBgn0013767	Crz	Corazonin	0.970108	0.00234921	0.00928753
FBgn0013771	Cyp6a9	Cytochrome P450-6a9	0.893578	8.02295e-08	8.74419e-07
FBgn0013772	Cyp6a8	Cytochrome P450-6a8	-1.95083	1.48788e-15	8.21576e-14
FBgn0013809	Dhc16F	Dynein heavy chain at 16F	0.744789	4.10523e-08	4.74975e-07
FBgn0013810	Dhc36C	Dynein heavy chain at 36C	1.1286	8.68363e-17	5.84815e-15
FBgn0013811	Dhc62B	Dynein heavy chain at 62B	0.661058	5.00375e-07	4.61589e-06
FBgn0013813	Dhc98D	Dynein heavy chain at 89D	0.463019	0.00027888	0.00138678
FBgn0013983	imd	immune deficiency	-0.523682	7.36677e-06	5.22717e-05
FBgn0013995	Calx	Na/Ca-exchange protein	0.729876	2.25914e-08	2.80412e-07
FBgn0014000	Hf	Helical Factor	-0.449951	0.00134315	0.00568645
FBgn0014018	Rel	Relish	-0.472339	0.00016214	0.000849032
FBgn0014029	44441	Septin 2	-0.334537	0.0060267	0.0211243
FBgn0014033	Sr-CI	Scavenger receptor class C, type I	-0.397057	0.0138004	0.0428811
FBgn0014135	bnl	branchless	-0.333506	0.010558	0.0342744
FBgn0014141	cher	cheerio	-0.5066	0.00322614	0.0122516
FBgn0014427	CG11899	-	-0.789458	4.28639e-09	6.25824e-08
FBgn0014465	Cp7Fb	Chorion protein b at 7F	0.824302	0.0104594	0.0339827
FBgn0014469	Cyp4e2	Cytochrome P450-4e2	-0.456328	0.000386951	0.00186914
FBgn0014906	Hydr2	alpha/beta hydrolase2	0.391672	0.000797847	0.00357713
FBgn0014931	CG2678	-	-0.830954	0.00142963	0.00600239
FBgn0015001	iotaTry	iotaTrypsin	0.474088	0.00638413	0.0221968
FBgn0015008	Actn3	alpha actinin 3	0.432884	0.000876441	0.00389154
FBgn0015011	Ahcy89E	Adenosylhomocysteinase 89E	-0.44512	0.000258673	0.0012957
FBgn0015033	Cyp4d8	Cytochrome P450-4d8	1.07095	2.38695e-06	1.88545e-05
FBgn0015035	Cyp4e3	Cytochrome P450-4e3	4.20853	4.68019e-41	1.60379e-38
FBgn0015036	Cyp4ae1	Cytochrome P450-4ae1	1.85063	1.41965e-09	2.30046e-08
FBgn0015037	Cyp4p1	Cytochrome P450-4p1	1.10923	4.476e-13	1.61623e-11
FBgn0015075	Ddx1	Dead-box-1	-0.281418	0.0114996	0.0367979
FBgn0015229	glec	gliolectin	-0.427132	0.000806552	0.00361012
FBgn0015230	Glut3	Glucose transporter type 3	1.03714	9.72135e-09	1.31549e-07
FBgn0015240	Hr96	Hormone receptor-like in 96	0.591062	3.77954e-08	4.41237e-07
FBgn0015300	Ssl	Suppressor of Stellate-like	0.678612	0.000578824	0.00269539
FBgn0015520	nonA-l	nonA-like	-0.475169	1.15388e-05	7.89883e-05
FBgn0015524	otp	orthopedia	0.331504	0.00704601	0.0242163
FBgn0015569	alpha-Est10	alpha-Esterase-10	0.643801	6.66035e-06	4.79011e-05
FBgn0015570	alpha-Est2	alpha-Esterase-2	1.03689	0.000106989	0.000584404
FBgn0015574	alpha-Est6	alpha-Esterase-6	0.452728	0.00121981	0.00519446
FBgn0015576	alpha-Est8	alpha-Esterase-8	0.767833	0.000281176	0.00139701
FBgn0015591	AstA	Allatostatin A	0.533438	0.000195752	0.00100738
FBgn0015600	toc	toucan	0.468124	4.03276e-05	0.000246515
FBgn0015623	Cpr	Cytochrome P450 reductase	0.4071	0.000642092	0.00295692
FBgn0015795	Rab7	Rab7	-0.405129	0.00286425	0.0110538
FBgn0015808	ScpX	Sterol carrier protein X-related thiolase	-0.285341	0.00834524	0.0278757
FBgn0015829	TfIIEbeta	Transcription factor IIEbeta	-0.340484	0.00882032	0.029231
FBgn0015831	Rtnl2	Rtnl2	0.461432	0.000111542	0.000605019
FBgn0015872	Drip	Drip	-0.359297	0.00205842	0.00827272
FBgn0016013	Faa	Fumarylacetoacetase	0.65628	0.00315271	0.0120354
FBgn0016031	lama	lamina ancestor	-0.612993	6.38785e-08	7.14062e-07
FBgn0016032	lbm	late bloomer	-0.57983	1.27459e-06	1.08002e-05
FBgn0016034	mael	maelstrom	-0.338035	0.00854176	0.0284587
FBgn0016075	vkg	viking	-0.549443	1.59707e-05	0.000105305
FBgn0016078	wun	wunen	-0.419969	0.000193789	0.000999484
FBgn0016080	xmas-1	xmas-1	0.574377	5.34249e-06	3.9148e-05
FBgn0016122	Acer	Angiotensin-converting enzyme-related	0.435531	8.18392e-05	0.000459301
FBgn0016123	Aph-4	Alkaline phosphatase 4	0.800347	1.24252e-06	1.05515e-05
FBgn0016126	CaMKI	Calcium/calmodulin-dependent protein kinase I	-0.56218	1.57971e-05	0.000104338
FBgn0016675	Lectin-galC1	Galactose-specific C-type lectin	-0.818534	5.94596e-11	1.38001e-09
FBgn0016684	NaPi-T	Na[+]-dependent inorganic phosphate cotransporter	-0.392285	0.00160424	0.00664925
FBgn0016694	Pdp1	PAR-domain protein 1	0.816725	2.40274e-07	2.3724e-06
FBgn0016697	Prosalpha5	Proteasome alpha5 subunit	-0.336903	0.00685169	0.023625
FBgn0016701	Rab4	Rab4	-0.28487	0.0065	0.022566
FBgn0016715	Reg-2	Rhythmically expressed gene 2	-0.404856	0.000716134	0.00324531
FBgn0016754	sba	six-banded	-0.267877	0.0145787	0.0448882
FBgn0016917	Stat92E	Signal-transducer and activator of transcription protein at 92E	-0.365098	0.00479147	0.0172941
FBgn0016926	Pino	Pinocchio	-0.463166	0.00130741	0.00554722
FBgn0016930	Dyrk2	Dual-specificity tyrosine phosphorylation-regulated kinase 2	-0.504601	0.00848514	0.0283024
FBgn0016974	swaPsi	swallow pseudogene	0.525971	0.000215387	0.00109728
FBgn0017424	CR11538	-	-0.489235	0.00575067	0.0203034
FBgn0017456	Ubc84D	Ubiquitin conjugating enzyme 84D	0.820913	5.48029e-08	6.21722e-07
FBgn0017550	Rga	Regena	-0.412039	0.000889551	0.00394224
FBgn0017556	Prosalpha4T2	Proteasome alpha4 subunit, Testis-specific 2	0.633447	5.39021e-07	4.93722e-06
FBgn0017561	Ork1	Open rectifier K[+] channel 1	0.5484	0.00114847	0.00493838
FBgn0019637	Atu	Another transcription unit	-0.307205	0.00980878	0.0321017
FBgn0019828	dj	don juan	0.909713	4.2264e-13	1.54363e-11
FBgn0019890	Smg5	Smg5	-0.64896	4.04046e-06	3.02736e-05
FBgn0019932	SamDC	S-adenosylmethionine decarboxylase	-0.614551	1.17527e-07	1.23583e-06
FBgn0019949	Cdk9	Cyclin-dependent kinase 9	-0.349535	0.00524808	0.0187218
FBgn0019952	Orct	Organic cation transporter	-0.501797	0.00015845	0.000831203
FBgn0019972	Drice	Death related ICE-like caspase	-0.506039	9.58095e-06	6.62479e-05
FBgn0020236	ATPCL	ATP citrate lyase	-0.769493	2.71429e-07	2.63755e-06
FBgn0020257	Ppa	Partner of paired	-0.33711	0.00464535	0.0168485
FBgn0020280	laf	labial associated factor	0.618208	4.96684e-05	0.000295098
FBgn0020299	stumps	stumps	-0.279637	0.0143864	0.0444016
FBgn0020304	drongo	drongo	-0.356864	0.00692661	0.0238481
FBgn0020371	Tim17b2	Translocase inner membrane 17	0.702339	3.77117e-08	4.40702e-07
FBgn0020385	pug	pugilist	-0.99051	1.61898e-13	6.45985e-12
FBgn0020399	Mst89B	Mst89B	0.69416	8.99544e-08	9.72225e-07
FBgn0020414	Idgf3	Imaginal disc growth factor 3	-0.435339	0.000298496	0.00147644
FBgn0020416	Idgf1	Imaginal disc growth factor 1	-0.552653	4.29561e-06	3.20821e-05
FBgn0020445	E23	Early gene at 23	-0.610045	4.73234e-05	0.000283332
FBgn0020503	CLIP-190	Cytoplasmic linker protein 190	0.408964	0.00148487	0.00620524
FBgn0020506	Amyrel	Amyrel	-3.20653	4.06518e-35	8.30937e-33
FBgn0020508	Ag5r2	Antigen 5-related 2	1.309	1.20347e-15	6.87337e-14
FBgn0020513	ade5	ade5	-0.60999	2.80639e-05	0.000177221
FBgn0020521	pio	piopio	-0.315212	0.0157837	0.0481073
FBgn0020545	kraken	kraken	0.518341	1.65744e-05	0.000108671
FBgn0020642	Lcp65Ac	Lcp65Ac	-0.597208	0.00138919	0.00585155
FBgn0020647	KrT95D	Krueppel target at 95D	-0.339119	0.00782139	0.0263601
FBgn0020762	Atet	ABC transporter expressed in trachea	-0.836959	7.17997e-14	3.02e-12
FBgn0020906	Jon25Bi	Jonah 25Bi	-1.20049	4.23995e-09	6.20599e-08
FBgn0020907	Scp2	Sarcoplasmic calcium-binding protein 2	-0.383849	0.0143241	0.0442446
FBgn0021760	chb	chromosome bows	0.425964	0.000998392	0.0043681
FBgn0022160	Gpo-1	Glycerophosphate oxidase-1	0.748232	0.000451687	0.00215152
FBgn0022338	dnk	deoxyribonucleoside kinase	0.379386	0.00626164	0.0218426
FBgn0022355	Tsf1	Transferrin 1	-0.822565	2.10059e-06	1.69019e-05
FBgn0022359	Sodh-2	Sorbitol dehydrogenase-2	-0.559611	0.00553876	0.0196684
FBgn0022361	Pur-alpha	Purine-rich binding protein-alpha	-0.278075	0.0115583	0.0369758
FBgn0022382	Pka-R2	cAMP-dependent protein kinase R2	0.364272	0.00128126	0.00544421
FBgn0022700	Cht4	Chitinase 4	-3.49229	1.12332e-35	2.42367e-33
FBgn0022702	Cht2	Chitinase 2	-0.521365	3.19498e-06	2.46195e-05
FBgn0022770	Peritrophin-A	Peritrophin A	0.553132	0.000691581	0.00315366
FBgn0022774	Oat	Ornithine aminotransferase precursor	-1.12061	1.35195e-16	8.75086e-15
FBgn0022943	Cbp20	cap binding protein 20	-0.30861	0.010456	0.0339812
FBgn0022984	qkr58E-3	quaking related 58E-3	-0.37936	0.000599856	0.00278665
FBgn0023000	mth	methuselah	-0.414902	0.000228625	0.00115864
FBgn0023076	Clk	Clock	0.549318	6.44883e-05	0.000371592
FBgn0023090	dtr	defective transmitter release	0.634672	1.80658e-07	1.83349e-06
FBgn0023129	aay	astray	-0.88503	5.32379e-16	3.18089e-14
FBgn0023197	Jon74E	Jonah 74E	0.943922	5.63876e-09	7.96208e-08
FBgn0023495	Lip3	Lip3	-0.966215	2.67725e-05	0.00017008
FBgn0023507	CG3835	-	1.09682	2.73693e-14	1.20969e-12
FBgn0023528	CG2924	-	-0.369353	0.00265258	0.0103535
FBgn0023541	Cyp4d14	Cyp4d14	1.2017	8.5984e-11	1.94147e-09
FBgn0023549	Mct1	Monocarboxylate transporter 1	-0.471551	0.000625079	0.00289114
FBgn0024230	Hs2st	Heparan sulfate 2-O-sulfotransferase	-0.361883	0.00111837	0.00482595
FBgn0024288	Sox100B	Sox100B	0.698562	0.00206856	0.00830777
FBgn0024294	Spn43Aa	Serpin 43Aa	-1.1207	2.39063e-11	6.14036e-10
FBgn0024315	Picot	Picot	-0.620883	3.97833e-05	0.000243699
FBgn0024320	Npc1a	Niemann-Pick type C-1a	-0.332623	0.00908376	0.0299816
FBgn0024361	Tsp2A	Tetraspanin 2A	1.03332	8.22707e-20	7.79298e-18
FBgn0024841	Pcd	pterin-4a-carbinolamine dehydratase	-0.52263	3.86609e-06	2.90793e-05
FBgn0024920	Ts	Ts	0.57069	0.000263456	0.00131739
FBgn0024958	Irp-1A	Iron regulatory protein 1A	-0.834845	6.64681e-11	1.5335e-09
FBgn0024963	GluClalpha	GluClalpha	0.349983	0.00653238	0.0226649
FBgn0024980	Syx4	Syntaxin 4	-0.566915	2.8805e-05	0.000181213
FBgn0024997	CG2681	-	1.41429	7.22303e-09	9.97103e-08
FBgn0025115	Acyp	Acylphosphatase	1.46081	1.47794e-09	2.37182e-08
FBgn0025186	ari-2	ariadne 2	-0.337726	0.00271525	0.0105486
FBgn0025378	CG3795	-	0.803839	0.000162131	0.000849032
FBgn0025387	CG12184	-	0.389523	0.00728902	0.0248597
FBgn0025388	CG12179	-	0.411332	0.000862499	0.00383548
FBgn0025454	Cyp6g1	Cyp6g1	-0.995466	1.92039e-09	3.00328e-08
FBgn0025456	CREG	Cellular Repressor of E1A-stimulated Genes	-0.673942	4.47953e-05	0.000269721
FBgn0025573	PpN58A	Protein phosphatase N at 58A	0.665101	0.000224273	0.00113807
FBgn0025574	Pli	Pellino	-0.37315	0.00720985	0.024634
FBgn0025578	Lcp9	Larval cuticle protein 9	-1.7803	2.3881e-14	1.07015e-12
FBgn0025595	AkhR	Adipokinetic hormone receptor	0.66347	1.74936e-06	1.43838e-05
FBgn0025612	CG3062	-	0.693699	0.00922293	0.0303635
FBgn0025616	CG13359	-	0.808068	1.57714e-05	0.000104227
FBgn0025620	CG13360	-	1.57236	4.86114e-17	3.43255e-15
FBgn0025683	CG3164	-	-0.413086	0.00252164	0.00987549
FBgn0025684	MFS18	Major Facilitator Superfamily Transporter 18	0.406229	0.000962623	0.00423547
FBgn0025686	Amnionless	Amnionless ortholog	-0.898458	1.04577e-08	1.39888e-07
FBgn0025687	LKR	lysine ketoglutarate reductase	-0.925151	3.19252e-16	1.94744e-14
FBgn0025692	CG3814	-	1.27612	2.64259e-18	2.16823e-16
FBgn0025693	ZnT41F	Zinc transporter 41F	-0.463055	0.000103352	0.000566927
FBgn0025697	santa-maria	scavenger receptor acting in neural tissue and majority of rhodopsin is absent	-0.707812	0.000276003	0.00137482
FBgn0025702	srpk79D	serine-arginine protein kinase at 79D	0.485772	2.27991e-05	0.000145872
FBgn0025821	I-t	inhibitor-t	0.756682	3.3389e-08	3.96549e-07
FBgn0025837	CG17636	-	0.585028	4.47746e-05	0.000269721
FBgn0025838	CG2652	-	0.524104	0.00135541	0.00572792
FBgn0026061	Mipp1	Multiple inositol polyphosphate phosphatase 1	2.26598	1.88741e-49	9.05455e-47
FBgn0026084	cib	ciboulot	-0.439463	0.0102503	0.0333873
FBgn0026136	CkIIbeta2	Casein kinase II beta2 subunit	0.481272	0.000821415	0.00367101
FBgn0026141	Cdlc2	Cytoplasmic dynein light chain 2	0.501679	0.000110935	0.000602285
FBgn0026144	CBP	sarcoplasmic calcium-binding protein	-0.377513	0.000731504	0.00330981
FBgn0026147	CG16833	-	0.451416	0.00010071	0.000554524
FBgn0026175	SkpC	SKP1-related C	-0.715772	7.95625e-05	0.000447818
FBgn0026181	Rok	Rho kinase	-0.301858	0.0127275	0.0400888
FBgn0026263	bip1	bip1	-0.284667	0.00922888	0.0303699
FBgn0026309	aft	adrift	-0.320324	0.00454866	0.0165304
FBgn0026315	Ugt35a	UDP-glycosyltransferase 35a	0.747672	3.06233e-06	2.366e-05
FBgn0026316	Ubc10	Ubiquitin conjugating enzyme 10	-0.304821	0.00701718	0.0241314
FBgn0026320	Tom	Twin of m4	-0.341197	0.0096733	0.0317029
FBgn0026361	44444	Septin 5	-0.425997	0.00402925	0.0148606
FBgn0026369	Sara	Smad anchor for receptor activation	-0.299484	0.00657457	0.0227808
FBgn0026371	SAK	Sak kinase	0.282799	0.0113803	0.0364563
FBgn0026374	Rhp	Rhophilin	-0.331231	0.00368147	0.0137433
FBgn0026403	Ndg	Nidogen/entactin	0.97916	2.07209e-09	3.22322e-08
FBgn0026404	Dronc	Death regulator Nedd2-like caspase	-0.533095	0.000292849	0.00145191
FBgn0026415	Idgf4	Imaginal disc growth factor 4	-0.357827	0.0134882	0.0421542
FBgn0026439	Eaat1	Excitatory amino acid transporter 1	0.798643	6.91281e-09	9.56546e-08
FBgn0026563	CG1979	-	0.844341	5.9276e-11	1.37849e-09
FBgn0026565	CG1315	-	0.948673	8.37387e-14	3.48443e-12
FBgn0026570	CG5704	-	0.620899	0.00461181	0.0167472
FBgn0026576	CG5991	-	0.530409	0.000102501	0.000563053
FBgn0026592	Fie	Fire exit	0.438387	0.00152035	0.00633762
FBgn0026619	Taz	Tafazzin	-0.366369	0.000685186	0.0031294
FBgn0026721	fat-spondin	fat-spondin	-0.454622	3.14332e-05	0.000196474
FBgn0026755	Ugt37b1	UDP-glycosyltransferase 37b1	-2.4611	3.19928e-23	3.92366e-21
FBgn0026760	Tehao	Tehao	0.491763	0.00276033	0.0107024
FBgn0027053	CSN5	COP9 signalosome subunit 5	-0.264176	0.0156441	0.0477394
FBgn0027055	CSN3	COP9 signalosome subunit 3	-0.334994	0.00121946	0.00519446
FBgn0027101	Dyrk3	Dual-specificity tyrosine phosphorylation-regulated kinase 3	-0.386534	0.00134756	0.00570096
FBgn0027280	l(1)G0193	lethal (1) G0193	-0.347277	0.0039693	0.0146767
FBgn0027348	bgm	bubblegum	0.736889	6.16255e-05	0.000357214
FBgn0027363	Stam	Signal transducing adaptor molecule	-0.348227	0.00968074	0.0317183
FBgn0027376	rha	rha	0.468299	4.66208e-05	0.000279701
FBgn0027493	AdSS	Adenylosuccinate Synthetase	0.429864	0.000198916	0.00102276
FBgn0027505	Rab3-GAP	Rab3 GTPase activating protein	0.280246	0.0129116	0.0405809
FBgn0027512	CG10254	-	0.306	0.0136042	0.0424321
FBgn0027513	ana2	anastral spindle 2	0.420683	0.00426664	0.0156323
FBgn0027514	CG1024	-	-0.327673	0.0121806	0.0386376
FBgn0027527	Osi6	Osiris 6	0.672103	0.00235133	0.0092897
FBgn0027529	CG8920	-	-0.360524	0.00283467	0.0109505
FBgn0027538	beta4GalNAcTA	beta4GalNAcTA	-0.345202	0.00448605	0.0163436
FBgn0027539	CG5807	-	0.311401	0.00390038	0.0144448
FBgn0027554	CG8042	-	0.320514	0.00351152	0.0132151
FBgn0027562	CG10345	-	0.878096	0.000343627	0.00167866
FBgn0027570	Nep2	Neprilysin 2	-1.04952	7.76213e-12	2.2275e-10
FBgn0027571	CG3523	-	1.20844	6.52777e-06	4.70638e-05
FBgn0027572	CG5009	-	-0.35498	0.00139936	0.00588802
FBgn0027574	CG5815	-	-0.325661	0.00853013	0.0284281
FBgn0027578	CG14526	-	-1.02238	3.77955e-15	1.96515e-13
FBgn0027584	CG4757	-	0.991739	0.0011942	0.0051059
FBgn0027585	CG8740	-	-0.344056	0.00450961	0.0164243
FBgn0027596	Kank	Kank	0.401979	0.000354129	0.0017249
FBgn0027597	CG17712	-	-0.293459	0.0158321	0.0482126
FBgn0027601	pdgy	pudgy	-0.421759	0.00139806	0.00588469
FBgn0027609	morgue	modifier of rpr and grim, ubiquitously expressed	-0.341747	0.00618501	0.0216141
FBgn0027611	LManII	Lysosomal alpha-mannosidase II	-1.03573	9.7087e-13	3.30749e-11
FBgn0027615	CG6404	-	0.395025	0.00300279	0.0115168
FBgn0027660	blot	bloated tubules	-0.457296	0.00031149	0.00153518
FBgn0027790	GV1	GV1	-0.417542	0.000659011	0.00302766
FBgn0027795	CG14785	-	0.454856	0.00106051	0.00460873
FBgn0027843	CAH2	Carbonic anhydrase 2	-0.569397	3.45373e-06	2.63087e-05
FBgn0027865	Tsp96F	Tetraspanin 96F	-0.512378	1.91505e-05	0.000123957
FBgn0027930	MP1	Melanization Protease 1	-0.363078	0.000511486	0.00241366
FBgn0027945	ppl	pumpless	-0.525308	1.39651e-06	1.17309e-05
FBgn0027949	msb1l	msb1l	0.37443	0.00147479	0.00617197
FBgn0028372	isopeptidase-T-3	isopeptidase-T-3	0.497902	2.79891e-05	0.000176844
FBgn0028379	fan	farinelli	0.416389	0.000411398	0.00197821
FBgn0028381	Decay	Death executioner caspase related to Apopain/Yama	0.50788	6.42128e-06	4.63246e-05
FBgn0028396	TotA	Turandot A	-0.98963	9.67744e-11	2.14765e-09
FBgn0028397	Tob	Tob	0.621	3.06613e-08	3.68664e-07
FBgn0028398	Taf10	TBP-associated factor 10	-0.34627	0.00513094	0.0183601
FBgn0028399	TMS1	TMS1	-0.349523	0.00760559	0.0257895
FBgn0028406	Drep4	DNA fragmentation factor-related protein 4	-0.606714	3.72806e-07	3.54288e-06
FBgn0028410	Pk34A	Pk34A	-0.632104	1.77195e-05	0.000115335
FBgn0028412	Mst33A	Mst33A	0.811054	2.11218e-10	4.28728e-09
FBgn0028421	Kap3	Kinesin associated protein 3	-0.284038	0.00919714	0.0302957
FBgn0028424	JhI-26	Juvenile hormone-inducible protein 26	0.558263	1.67326e-05	0.000109647
FBgn0028430	He	Hemese	-0.616215	3.29606e-06	2.52647e-05
FBgn0028468	rtet	tetracycline resistance	-0.333777	0.00537425	0.019125
FBgn0028482	bdl	borderless	0.634609	0.00746942	0.0253573
FBgn0028487	f-cup	flyers-cup	0.4929	5.81854e-06	4.23699e-05
FBgn0028491	CG2930	-	0.454647	0.00100048	0.00437559
FBgn0028496	CG30116	-	0.46985	0.00279515	0.0108194
FBgn0028506	CG4455	-	-0.303722	0.00560134	0.0198604
FBgn0028513	CG9254	-	0.854677	1.27371e-11	3.5e-10
FBgn0028514	CG4793	-	-0.570044	4.47204e-05	0.000269549
FBgn0028520	CG4891	-	0.550748	3.87421e-05	0.000237946
FBgn0028523	CG5888	-	-0.388263	0.00479946	0.0173176
FBgn0028530	mTTF	mitochondrial transcription termination factor	-0.332086	0.0107367	0.0347869
FBgn0028531	CG15286	-	0.761206	2.40988e-09	3.69927e-08
FBgn0028532	CG7968	-	1.85442	6.67844e-29	1.03747e-26
FBgn0028534	CG7916	-	0.710304	0.000304379	0.00150395
FBgn0028539	CG31731	-	-0.414599	0.00162984	0.00674814
FBgn0028540	CG9008	-	0.458626	2.8355e-05	0.000178962
FBgn0028550	Atf3	Activating transcription factor 3	0.662953	7.20328e-08	7.95947e-07
FBgn0028560	sut4	sugar transporter 4	0.783082	2.151e-09	3.32819e-08
FBgn0028561	sut3	sugar transporter 3	0.886732	1.20918e-09	1.99548e-08
FBgn0028563	sut1	sugar transporter 1	-0.54319	4.56742e-07	4.26744e-06
FBgn0028567	robl62A	robl62A	0.86336	5.30198e-11	1.26326e-09
FBgn0028569	robl37BC	robl37BC	1.0796	3.18442e-09	4.76886e-08
FBgn0028570	robl22E	robl22E	0.546158	0.00293162	0.0112839
FBgn0028583	lcs	la costa	3.10552	1.19287e-15	6.84639e-14
FBgn0028622	qsm	quasimodo	-0.414306	0.000744674	0.00336678
FBgn0028646	aralar1	aralar1	-0.817836	2.47188e-11	6.32964e-10
FBgn0028664	VhaM9.7-c	Vacuolar H[+] ATPase M9.7 subunit c	-0.309093	0.0102292	0.033328
FBgn0028668	Vha16-2	Vacuolar H[+] ATPase 16kD subunit 2	0.574729	0.00130922	0.00555287
FBgn0028669	Vha100-3	Vacuolar H[+] ATPase 100kD subunit 3	0.75042	1.3522e-09	2.20652e-08
FBgn0028675	Sur	Sulfonylurea receptor	-0.559757	0.000143757	0.000759943
FBgn0028703	Nhe3	Na[+]/H[+] hydrogen exchanger 3	-0.369126	0.00382167	0.0142065
FBgn0028704	Nckx30C	Nckx30C	0.303614	0.0164525	0.049828
FBgn0028838	CSN1a	COP9 signalosome subunit 1a	0.936861	1.53422e-09	2.45656e-08
FBgn0028844	CG15283	-	0.903012	1.73655e-06	1.43088e-05
FBgn0028847	CG9014	-	0.566023	2.46961e-06	1.94284e-05
FBgn0028848	CG7311	-	0.575768	8.44405e-06	5.90881e-05
FBgn0028850	CG15260	-	0.732924	1.91336e-06	1.55133e-05
FBgn0028855	CG15282	-	1.08502	4.9707e-12	1.45512e-10
FBgn0028856	CG18063	-	0.7399	3.0556e-07	2.94038e-06
FBgn0028857	CG12448	-	0.819347	4.91179e-09	7.08258e-08
FBgn0028858	CG10839	-	0.497834	0.00452255	0.016456
FBgn0028868	CG4701	-	0.5954	1.5538e-05	0.000102918
FBgn0028870	CG4691	-	0.903531	2.26805e-12	7.16125e-11
FBgn0028875	nAChRalpha5	nicotinic Acetylcholine Receptor alpha5	0.576492	2.91693e-05	0.000183208
FBgn0028880	CG15256	-	0.934328	5.76249e-08	6.51201e-07
FBgn0028887	CG3491	-	-0.333585	0.0140495	0.0435618
FBgn0028892	CG4161	-	0.996295	2.0773e-12	6.61272e-11
FBgn0028893	CG31819	-	0.814395	3.61458e-09	5.35114e-08
FBgn0028896	CG17329	-	0.602182	4.52003e-06	3.36074e-05
FBgn0028899	CG31817	-	0.494386	0.000423084	0.00202854
FBgn0028900	CG18518	-	-0.461704	0.0083612	0.027913
FBgn0028901	CG18109	-	0.835009	5.20018e-10	9.60178e-09
FBgn0028902	Tektin-A	Tektin A	1.04554	5.93097e-14	2.54051e-12
FBgn0028903	CG13243	-	0.780569	8.30388e-10	1.44833e-08
FBgn0028913	CG3473	-	0.925432	8.92159e-07	7.79786e-06
FBgn0028916	CG33090	-	0.588391	1.05304e-05	7.24262e-05
FBgn0028935	CG7653	-	0.99992	4.92071e-10	9.15833e-09
FBgn0028938	CG16886	-	-3.20736	8.56925e-40	2.69839e-37
FBgn0028939	NimC2	Nimrod C2	-1.15175	3.38373e-14	1.47655e-12
FBgn0028941	CG16853	-	0.83055	7.63741e-07	6.7514e-06
FBgn0028942	CG16852	-	0.58671	0.00135656	0.00573071
FBgn0028943	CG15638	-	1.02176	3.00709e-08	3.62962e-07
FBgn0028945	CG7631	-	0.793704	0.00799882	0.0268726
FBgn0028950	CG15255	-	7.4338	1.88081e-131	7.30443e-128
FBgn0028983	Spn55B	Serpin 55B	0.532439	3.5796e-05	0.000221369
FBgn0028984	Spn88Ea	Serpin 88Ea	-0.381941	0.000498357	0.00235743
FBgn0028988	Spn42Dd	Serpin 42Dd	-0.329001	0.0141381	0.0437859
FBgn0028990	Spn27A	Serpin 27A	-0.484801	7.6592e-06	5.41818e-05
FBgn0028992	sds22	sds22	-0.45459	1.65324e-05	0.000108457
FBgn0028997	nmdyn-D7	nmdyn-D7	0.482667	0.000249671	0.00125655
FBgn0029002	miple2	midkine and pleiotrophin 2	-0.463878	8.79891e-05	0.000489571
FBgn0029084	gom	gomdanji	0.783722	7.17133e-07	6.40745e-06
FBgn0029092	ced-6	ced-6	-0.713242	2.72511e-06	2.13089e-05
FBgn0029093	cathD	cathD	-0.459003	0.00713038	0.024445
FBgn0029128	tyn	trynity	-0.430818	0.000131058	0.000699157
FBgn0029147	NtR	NtR	-0.472721	0.000179546	0.000932632
FBgn0029170	TwdlT	TweedleT	-1.69177	1.32202e-09	2.16636e-08
FBgn0029174	FKBP59	FK506-binding protein FKBP59	-0.287552	0.00954771	0.0313353
FBgn0029501	Crtp	Caldesmon-related protein	0.849419	1.73599e-13	6.8796e-12
FBgn0029539	CG11663	-	0.541566	0.000418717	0.00201091
FBgn0029552	CG14631	-	0.919361	7.43574e-06	5.2697e-05
FBgn0029590	CG14811	-	-0.825851	0.00306735	0.0117365
FBgn0029603	CG14053	-	0.51728	0.00113737	0.00489887
FBgn0029608	CG3091	-	0.462568	0.000239556	0.00121035
FBgn0029648	CG3603	-	-0.484355	0.000182316	0.000946175
FBgn0029656	CG10793	-	0.536572	0.000204718	0.0010475
FBgn0029657	CG12535	-	0.558957	0.00293037	0.0112828
FBgn0029658	CG14269	-	0.685834	6.80149e-05	0.000389215
FBgn0029659	CG16782	-	0.558947	6.66988e-07	5.9962e-06
FBgn0029660	CG10801	-	0.509222	0.0102239	0.03332
FBgn0029661	CG16781	-	0.37435	0.013201	0.0413566
FBgn0029662	CG12206	-	0.542517	1.47229e-05	9.81332e-05
FBgn0029667	Gas8	Growth arrest specific protein 8	0.728022	2.4272e-06	1.91335e-05
FBgn0029679	CG2901	-	0.459617	0.00914151	0.030138
FBgn0029700	CG15576	-	0.422437	0.0086505	0.0287552
FBgn0029702	CG15572	-	0.451599	0.000407826	0.00196184
FBgn0029703	CG12692	-	0.342632	0.00508676	0.0182188
FBgn0029705	CG12693	-	0.386947	0.00800685	0.0268919
FBgn0029710	CG3568	-	-0.693858	1.61655e-08	2.08807e-07
FBgn0029717	CG12684	-	0.582921	0.000218377	0.00111057
FBgn0029722	CG7024	-	0.407781	0.00196141	0.00794312
FBgn0029724	CG15472	-	0.504896	0.000533121	0.00250358
FBgn0029725	CG2871	-	0.489953	0.000353339	0.00172177
FBgn0029726	CG15471	-	0.80571	0.00117101	0.0050252
FBgn0029728	CG2861	-	-0.607744	3.16991e-05	0.00019803
FBgn0029729	CG12682	-	0.803262	0.000695039	0.00316571
FBgn0029730	CG12681	-	0.599308	2.80124e-06	2.17872e-05
FBgn0029736	CG4041	-	-0.397457	0.000202749	0.00103926
FBgn0029740	CG12680	-	0.715309	0.00268251	0.0104458
FBgn0029747	CG5062	-	0.730941	1.07282e-07	1.13734e-06
FBgn0029750	CG3323	-	0.535255	1.89119e-05	0.000122481
FBgn0029751	CG17764	-	0.473767	0.00739441	0.0251539
FBgn0029753	CG4198	-	0.5068	2.40285e-05	0.000153233
FBgn0029754	CG15930	-	-0.88194	1.33609e-05	8.99293e-05
FBgn0029756	CG3309	-	-0.377377	0.00833919	0.0278672
FBgn0029762	NAAT1	Nutrient Amino Acid Transporter 1	0.807662	4.44796e-09	6.46981e-08
FBgn0029770	CG4151	-	-4.43888	2.20555e-06	1.76006e-05
FBgn0029799	CG15772	-	-1.80719	7.2743e-07	6.48453e-06
FBgn0029804	CG3097	-	-0.662589	0.0141553	0.0438235
FBgn0029809	CG15767	-	0.67284	0.00156272	0.00649795
FBgn0029810	CG12239	-	0.378788	0.0130329	0.040907
FBgn0029812	Prosbeta2R1	Proteasome beta2 subunit-related 1	0.499278	0.00159249	0.00660757
FBgn0029816	CG12729	-	0.633095	0.00329733	0.0124974
FBgn0029817	CG15764	-	0.466	0.000707011	0.00320833
FBgn0029820	CG16721	-	-0.547955	1.38444e-05	9.2789e-05
FBgn0029821	CG4020	-	-0.335556	0.00913166	0.0301218
FBgn0029823	CG3011	-	-1.16732	1.26555e-16	8.23736e-15
FBgn0029824	CG3726	-	-0.47766	0.00705865	0.0242525
FBgn0029825	CG12728	-	-0.365804	0.00659563	0.02283
FBgn0029826	CG6041	-	0.838047	3.12752e-10	6.09343e-09
FBgn0029827	CG6048	-	2.22723	8.83844e-09	1.21007e-07
FBgn0029828	CG6067	-	-1.63702	7.21299e-23	8.66377e-21
FBgn0029831	CG5966	-	-0.583908	2.52197e-05	0.000160478
FBgn0029838	CG4666	-	-0.554758	3.27294e-06	2.51206e-05
FBgn0029849	Efr	ER GDP-fucose transporter	0.347705	0.00494302	0.0177641
FBgn0029856	CG11700	-	-0.900004	2.85984e-11	7.20517e-10
FBgn0029859	CG15892	-	0.550657	3.43408e-06	2.61849e-05
FBgn0029863	CG3823	-	-0.759502	9.37851e-08	1.01081e-06
FBgn0029866	CG3842	-	-0.508785	0.000138394	0.000734926
FBgn0029877	CG17717	-	0.538156	0.000917803	0.00405204
FBgn0029880	CG14443	-	-0.980609	0.00215202	0.00860438
FBgn0029890	CG4095	-	0.657639	6.31924e-06	4.57017e-05
FBgn0029896	CG3168	-	-0.427761	0.00351665	0.0132297
FBgn0029898	CG14439	-	-0.725965	1.5826e-10	3.31633e-09
FBgn0029913	Cht11	Cht11	-0.614914	5.27675e-06	3.8715e-05
FBgn0029914	CG4558	-	-0.419531	0.000211905	0.00108143
FBgn0029924	CG4586	-	-0.733103	1.259e-10	2.71138e-09
FBgn0029932	CG4607	-	-0.422837	0.000827716	0.0036935
FBgn0029935	CG4615	-	0.544863	3.54867e-05	0.000219689
FBgn0029940	CG1958	-	0.538292	3.90689e-05	0.000239827
FBgn0029944	Dok	Downstream of kinase	-0.277234	0.0152704	0.0467831
FBgn0029945	CG18155	-	0.43967	0.000401593	0.00193505
FBgn0029946	CG15034	-	0.491128	0.000189952	0.000981435
FBgn0029947	CG1999	-	0.44382	0.000159519	0.000836436
FBgn0029949	CG15035	-	0.508791	0.000346906	0.00169254
FBgn0029951	CG11369	-	0.578115	1.3225e-05	8.92211e-05
FBgn0029952	CG12689	-	0.509107	6.55306e-05	0.000376107
FBgn0029963	CG10920	-	0.534635	0.000123564	0.000662425
FBgn0029964	CG1409	-	0.68233	0.0078672	0.0264992
FBgn0029969	CG10932	-	-0.265347	0.0126088	0.0397579
FBgn0029986	CG15332	-	-0.733483	4.35136e-05	0.000263091
FBgn0029990	CG2233	-	-1.1731	5.59161e-11	1.31036e-09
FBgn0029993	CG1571	-	0.524105	0.00024545	0.00123798
FBgn0029994	CG2254	-	1.75022	5.85838e-20	5.59475e-18
FBgn0029996	UbcE2H	Ubiquitin conjugating enzyme E2H	-0.361371	0.00830572	0.0277676
FBgn0030004	CG10958	-	0.365423	0.0060889	0.021323
FBgn0030013	GIIIspla2	-	0.785099	1.83129e-07	1.85695e-06
FBgn0030014	CG15337	-	0.5582	0.000767285	0.00345685
FBgn0030015	CG10761	-	0.425408	0.0101539	0.0331104
FBgn0030033	CG1387	-	0.524422	0.000109134	0.000594656
FBgn0030040	CG15347	-	1.80827	3.17497e-25	4.35194e-23
FBgn0030041	CG12116	-	0.650744	1.41044e-05	9.43886e-05
FBgn0030051	spirit	Serine Protease Immune Response Integrator	-0.970089	9.62999e-15	4.61725e-13
FBgn0030053	CG12081	-	-0.372399	0.000631863	0.00291673
FBgn0030056	CG11284	-	0.41418	0.000536287	0.00251744
FBgn0030065	CG12075	-	-0.294373	0.00811704	0.0272002
FBgn0030073	CG10962	-	-1.34238	3.07634e-21	3.34976e-19
FBgn0030078	CG10970	-	0.93366	0.000203102	0.00104061
FBgn0030090	fend	forked end	-0.553926	1.76909e-05	0.000115278
FBgn0030104	CG15368	-	0.933621	6.87445e-06	4.92887e-05
FBgn0030114	CG17754	-	-0.501575	0.000606493	0.00281412
FBgn0030116	CR17438	-	0.34733	0.0143769	0.0443841
FBgn0030148	CG3106	-	1.52213	0.0082621	0.0276297
FBgn0030156	CG15247	-	0.555926	0.012079	0.0383782
FBgn0030157	CG1468	-	0.457038	0.000243908	0.00123181
FBgn0030159	CG9689	-	-0.710605	6.3923e-08	7.14062e-07
FBgn0030160	CG9691	-	-0.831306	2.83814e-13	1.0771e-11
FBgn0030170	CG2990	-	0.619068	0.00562148	0.0199144
FBgn0030183	CG15309	-	-0.40189	0.00232765	0.0092149
FBgn0030186	CG2962	-	-1.86813	1.14315e-30	1.9027e-28
FBgn0030191	CG15306	-	0.531503	8.7753e-06	6.12956e-05
FBgn0030195	CG2898	-	0.395088	0.0128801	0.0405018
FBgn0030215	CG15296	-	0.386635	0.00781426	0.0263437
FBgn0030224	CG12637	-	0.731475	6.08496e-05	0.000353243
FBgn0030234	CG15211	-	0.799033	8.35472e-12	2.37997e-10
FBgn0030237	CG15209	-	-0.464126	4.24364e-05	0.000257917
FBgn0030242	sofe	sister of feo	0.3622	0.0023867	0.00941031
FBgn0030247	CG15208	-	0.543265	1.32497e-05	8.93361e-05
FBgn0030262	Vago	Vago	-0.405864	0.00746329	0.0253512
FBgn0030274	Lint-1	l(3)mbt interacting protein 1	-0.388299	0.000641489	0.00295568
FBgn0030277	CG1394	-	0.606229	4.03741e-07	3.82128e-06
FBgn0030278	CG15200	-	0.512002	0.000331633	0.00162483
FBgn0030280	CG11106	-	0.434579	0.00199875	0.00807189
FBgn0030283	CG15198	-	0.676682	1.1286e-05	7.73942e-05
FBgn0030290	CG11756	-	0.633214	0.000352549	0.00171864
FBgn0030296	CG15196	-	0.58222	4.85231e-05	0.000289474
FBgn0030310	PGRP-SA	Peptidoglycan recognition protein SA	-0.513908	0.000124256	0.000665
FBgn0030313	CG11697	-	0.38675	0.0109081	0.0352442
FBgn0030319	CG2533	-	0.415778	0.0067181	0.0232056
FBgn0030320	CG2247	-	-0.31306	0.00296314	0.011385
FBgn0030326	CG2444	-	-0.919718	3.68846e-06	2.78151e-05
FBgn0030329	prtp	pretaporter	-0.341333	0.014177	0.0438599
FBgn0030331	CG15221	-	2.08742	4.76001e-11	1.15539e-09
FBgn0030334	Karl	Karl	-0.551181	8.8042e-07	7.70103e-06
FBgn0030347	CG15739	-	1.17515	4.47719e-07	4.19323e-06
FBgn0030356	CR32661	-	0.518977	0.000107532	0.000587093
FBgn0030357	Sclp	Sclp	-0.559156	0.000412339	0.00198192
FBgn0030359	CG18130	-	0.608609	0.000110061	0.000598655
FBgn0030362	regucalcin	regucalcin	-0.728643	4.05896e-05	0.000247726
FBgn0030364	CG15735	-	-0.292721	0.00573365	0.0202555
FBgn0030369	Cyp318a1	Cyp318a1	-0.705163	0.0157018	0.0478779
FBgn0030370	Uch-L5R	Uch-L5-related	0.657102	0.000185182	0.000959342
FBgn0030376	CG2750	-	0.594692	8.20857e-07	7.22342e-06
FBgn0030377	CG1924	-	-0.394377	0.0107783	0.0349019
FBgn0030384	CG2577	-	0.967875	8.07412e-08	8.78352e-07
FBgn0030386	CG2574	-	0.768688	7.67458e-07	6.77912e-06
FBgn0030394	Cpr11A	Cuticular protein 11A	1.63358	0.00224796	0.00893585
FBgn0030395	Mks1	Meckel syndrome, type 1 homologue	-0.911657	0.00408159	0.0150347
FBgn0030398	Cpr11B	Cuticular protein 11B	-0.732151	0.0112565	0.0361394
FBgn0030425	CG3775	-	1.24435	3.16097e-08	3.78893e-07
FBgn0030429	CG4661	-	0.537029	7.35945e-05	0.000416642
FBgn0030440	CG15719	-	1.02353	7.72832e-06	5.46044e-05
FBgn0030441	CG2209	-	0.989428	2.43014e-07	2.3954e-06
FBgn0030449	Fer3HCH	Ferritin 3 heavy chain homologue	0.637682	0.00125298	0.00532791
FBgn0030462	CG15742	-	0.330661	0.0113743	0.0364553
FBgn0030483	CG12725	-	-0.599345	0.00317998	0.0121078
FBgn0030485	CG1998	-	-0.377227	0.00280916	0.0108664
FBgn0030494	Cpr12A	Cuticular protein 12A	-1.08222	2.55865e-20	2.48423e-18
FBgn0030509	CG11162	-	2.7744	2.36996e-12	7.44271e-11
FBgn0030510	CG12177	-	0.723733	9.5838e-05	0.000529449
FBgn0030525	CG10996	-	0.937567	4.58113e-07	4.27682e-06
FBgn0030536	CG11068	-	0.386842	0.00198407	0.008026
FBgn0030538	betaNACtes1	-	-0.795764	0.000201359	0.00103433
FBgn0030539	CG1368	-	-0.562055	0.00568744	0.0201167
FBgn0030541	CG11584	-	-1.00392	0.000262535	0.00131335
FBgn0030555	Fbxl4	F box and leucine-rich-repeat gene 4	-0.263696	0.0161363	0.0490105
FBgn0030563	betaNACtes2	-	-0.82084	0.00228426	0.00906467
FBgn0030566	betaNACtes4	-	-0.556265	0.00715121	0.0244911
FBgn0030574	CG9413	-	0.638307	2.4258e-07	2.39314e-06
FBgn0030575	CG5321	-	0.936142	9.37717e-05	0.000519265
FBgn0030578	CG5347	-	0.601541	0.00183484	0.00751148
FBgn0030586	CG12539	-	-1.33747	3.51757e-17	2.52983e-15
FBgn0030594	CG9509	-	-1.23878	5.49461e-15	2.74754e-13
FBgn0030595	CG14406	-	-1.2863	2.25995e-08	2.80412e-07
FBgn0030597	Eo	Ecdysone oxidase	-0.931739	4.02374e-09	5.9118e-08
FBgn0030598	CG9503	-	-0.446466	0.0062716	0.0218708
FBgn0030599	CG9030	-	0.466487	0.00198463	0.008026
FBgn0030600	hiw	highwire	0.467354	1.53584e-05	0.00010196
FBgn0030603	CG5541	-	0.496654	7.07449e-06	5.05984e-05
FBgn0030614	CG9072	-	0.441848	0.00742164	0.0252318
FBgn0030615	Cyp4s3	Cyp4s3	0.843862	0.00014105	0.000747077
FBgn0030620	CG5662	-	0.58379	0.0008935	0.00395523
FBgn0030622	CG9101	-	0.534723	0.000948857	0.00417963
FBgn0030623	PPYR1	Protein phosphatase Y regulator 1	0.537919	0.000654773	0.00301175
FBgn0030624	CG9106	-	0.397118	0.00802375	0.0269253
FBgn0030629	CG9123	-	-0.374228	0.00574253	0.0202807
FBgn0030647	CG6324	-	-0.717407	1.63502e-05	0.000107443
FBgn0030653	CG7860	-	-0.657001	1.18617e-07	1.24343e-06
FBgn0030661	CG8105	-	0.791059	1.29107e-06	1.09165e-05
FBgn0030667	CG15599	-	-0.799957	4.58753e-07	4.27936e-06
FBgn0030684	CG8260	-	1.16022	8.99933e-06	6.271e-05
FBgn0030688	CG8952	-	1.22882	7.00398e-16	4.08017e-14
FBgn0030691	Efhc1.1	EFHC1 homologue 1	0.601736	0.000106148	0.000580624
FBgn0030696	CG8509	-	0.48214	0.00666016	0.0230328
FBgn0030697	CG8565	-	0.339579	0.00410577	0.0151046
FBgn0030716	CG9170	-	-0.306757	0.0133079	0.041669
FBgn0030721	CG12698	-	0.466226	0.000578617	0.00269539
FBgn0030722	CG12395	-	0.618817	0.00011933	0.000642175
FBgn0030725	CG8958	-	0.742393	6.19315e-06	4.49293e-05
FBgn0030737	CG9914	-	-0.622837	2.45555e-06	1.93308e-05
FBgn0030740	CG9917	-	-0.301929	0.00483003	0.0174117
FBgn0030746	CG9981	-	1.19826	2.82814e-08	3.43236e-07
FBgn0030747	CG4301	-	0.953816	1.01884e-16	6.70648e-15
FBgn0030763	CG9782	-	0.828734	6.17603e-09	8.65907e-08
FBgn0030764	CG9777	-	0.322331	0.0122221	0.0387375
FBgn0030774	spheroide	spheroide	1.14821	3.66337e-12	1.11151e-10
FBgn0030775	CG9673	-	1.00731	2.86945e-11	7.20517e-10
FBgn0030776	CG4653	-	0.654351	0.00219148	0.00874115
FBgn0030777	CG9672	-	-0.631055	2.41627e-06	1.90603e-05
FBgn0030778	CG4678	-	-0.572522	0.00492777	0.0177147
FBgn0030780	CG13008	-	0.565643	9.33773e-06	6.49048e-05
FBgn0030788	Sap30	SIN3-associated polypeptide 30	-0.284386	0.0135629	0.0423535
FBgn0030797	CG13004	-	-0.269393	0.013605	0.0424321
FBgn0030814	CG4955	-	0.420632	0.0015782	0.00655298
FBgn0030823	CG8918	-	0.98142	3.70943e-07	3.52805e-06
FBgn0030828	CG5162	-	-0.479241	0.0154589	0.0472858
FBgn0030836	CG8664	-	-1.02905	8.94259e-10	1.53673e-08
FBgn0030837	CG8661	-	0.695852	8.80439e-08	9.54232e-07
FBgn0030838	CG5445	-	-0.297984	0.00585026	0.0205988
FBgn0030840	p-cup	presidents-cup	0.542484	0.000317807	0.00156433
FBgn0030846	CG12992	-	0.42012	0.000641569	0.00295568
FBgn0030847	CG12991	-	-0.279716	0.00937574	0.0308056
FBgn0030874	CG6506	-	-0.348385	0.0137616	0.0428021
FBgn0030876	CG6762	-	-1.51123	1.75455e-20	1.7472e-18
FBgn0030880	CG6788	-	-1.22554	3.95178e-05	0.0002422
FBgn0030881	CG12985	-	0.617511	0.00202271	0.00814888
FBgn0030898	Andorra	Andorra	0.566374	0.00584947	0.0205988
FBgn0030905	CG15059	-	0.575404	0.00609077	0.0213232
FBgn0030918	CG15056	-	-0.920363	2.35979e-07	2.33594e-06
FBgn0030925	Hayan	Hayan	-0.36786	0.003225	0.0122512
FBgn0030927	CG15046	-	-0.607093	9.32528e-06	6.4865e-05
FBgn0030928	CG15044	-	-0.370037	0.00132682	0.00561933
FBgn0030929	CG15043	-	1.50518	3.41274e-30	5.52248e-28
FBgn0030932	Ggt-1	gamma-glutamyl transpeptidase	-0.467999	4.25045e-05	0.000257927
FBgn0030933	CG6470	-	0.414803	0.000751496	0.00339104
FBgn0030936	CG6481	-	0.505885	6.9777e-05	0.000397541
FBgn0030940	CG15040	-	-0.471093	0.002202	0.0087741
FBgn0030951	CG6873	-	0.434108	0.014495	0.0446894
FBgn0030952	CG12609	-	0.493863	0.000246104	0.00124074
FBgn0030955	CG6891	-	-0.569732	2.42866e-05	0.000154794
FBgn0030958	CR6900	-	-0.584313	0.00130116	0.00552272
FBgn0030966	CG7280	-	-0.609823	7.79845e-08	8.52343e-07
FBgn0030975	SdhBL	Succinate dehydrogenase, subunit B (iron-sulfur)-like	0.423162	0.00015482	0.000812891
FBgn0030984	tgy	twiggy	0.738406	0.00194865	0.00789968
FBgn0030989	Inx5	Innexin 5	0.372703	0.00694177	0.0238862
FBgn0031000	Muc18B	Mucin 18B	1.84243	4.2987e-37	1.11298e-34
FBgn0031004	CG7992	-	1.03571	3.09416e-16	1.89737e-14
FBgn0031010	CG8028	-	0.809401	0.00359966	0.0134984
FBgn0031011	CG8034	-	-0.400854	0.000338673	0.00165654
FBgn0031022	CG12204	-	0.632834	0.00111116	0.00480018
FBgn0031026	CG12231	-	0.921678	0.00387174	0.014357
FBgn0031033	CG14219	-	4.53534	2.99365e-45	1.12513e-42
FBgn0031034	CG14205	-	7.87388	4.31872e-232	5.03175e-228
FBgn0031055	et	eye transformer	-0.387094	0.00983712	0.0321673
FBgn0031069	Pmp70	-	0.631712	1.3307e-05	8.96704e-05
FBgn0031080	CG12655	-	-0.411983	0.0165252	0.0499828
FBgn0031082	CG17003	-	0.569337	0.000255136	0.00128019
FBgn0031085	CG9570	-	0.600978	4.42031e-06	3.2908e-05
FBgn0031091	Phf7	PHD finger protein 7 ortholog	-0.434726	0.00152401	0.00634833
FBgn0031099	CG17065	-	-0.305751	0.0156094	0.0476462
FBgn0031101	CG1631	-	0.66458	0.000103574	0.000567875
FBgn0031103	CG12679	-	0.477594	0.00220581	0.0087863
FBgn0031108	CG15459	-	0.478391	0.000465857	0.00221629
FBgn0031117	GstT3	Glutathione S transferase T3	-0.579989	2.90885e-07	2.80787e-06
FBgn0031126	Cyp6v1	Cyp6v1	-0.463026	5.56301e-05	0.000326082
FBgn0031127	CG1835	-	0.532034	3.91083e-05	0.000239942
FBgn0031128	hydra	hydra	0.493032	4.15125e-05	0.000252697
FBgn0031129	CG1324	-	0.644056	3.05532e-08	3.67743e-07
FBgn0031130	CG15452	-	0.468899	0.00187175	0.00764598
FBgn0031132	CG15450	-	0.606567	0.000247876	0.0012488
FBgn0031134	CG1314	-	0.543881	0.000629699	0.00290905
FBgn0031139	CG11227	-	0.747518	3.46226e-07	3.29566e-06
FBgn0031142	r-cup	ryder cup	0.440626	0.00201467	0.00812211
FBgn0031157	CG1503	-	0.431803	0.00395737	0.0146372
FBgn0031163	CG14579	-	0.523305	4.40682e-05	0.000265892
FBgn0031168	CG1722	-	0.673892	2.77358e-05	0.00017553
FBgn0031170	CG1718	-	0.639437	6.12184e-05	0.000355207
FBgn0031171	CG1801	-	0.528199	3.77876e-05	0.000232552
FBgn0031178	CG10918	-	1.87617	5.71028e-18	4.55688e-16
FBgn0031191	Cp110	-	0.371302	0.00327456	0.0124152
FBgn0031201	CG12446	-	0.474866	0.00362801	0.0135776
FBgn0031208	CG11023	-	0.369877	0.00801543	0.0269052
FBgn0031220	CG4822	-	-0.820332	8.79492e-11	1.97818e-09
FBgn0031235	CG13693	-	1.07232	4.52508e-16	2.74592e-14
FBgn0031240	CG3345	-	0.67797	2.33241e-08	2.88481e-07
FBgn0031247	CG11562	-	0.463892	0.000167049	0.000871992
FBgn0031248	CG11912	-	-2.34352	1.58196e-35	3.35116e-33
FBgn0031249	CG11911	-	2.35214	9.86338e-35	1.98135e-32
FBgn0031250	Ent1	Equilibrative nucleoside transporter 1	-0.409209	0.000201479	0.00103433
FBgn0031261	nAChRbeta3	nicotinic Acetylcholine Receptor beta3	-0.597708	7.94785e-07	7.00457e-06
FBgn0031267	Ipk2	Ipk2	-0.935585	1.34466e-15	7.60514e-14
FBgn0031268	cold	coiled	-0.358639	0.0010883	0.00471542
FBgn0031275	GABA-B-R3	metabotropic GABA-B receptor subtype 3	0.443686	0.00714992	0.0244911
FBgn0031277	CG13947	-	3.54169	1.51167e-80	1.95694e-77
FBgn0031279	CG3544	-	1.38832	7.5994e-13	2.65888e-11
FBgn0031281	Saf6	SAGA factor-like TAF6	-0.343109	0.00745917	0.0253447
FBgn0031289	CG13950	-	0.764198	0.00390175	0.0144453
FBgn0031292	CG15824	-	0.702352	9.81332e-09	1.32639e-07
FBgn0031294	IA-2	IA-2 ortholog	0.450789	0.000311038	0.0015336
FBgn0031295	CG4375	-	0.875819	2.12721e-10	4.30279e-09
FBgn0031296	CG4415	-	-0.907161	3.8739e-10	7.37496e-09
FBgn0031298	Atg4a	Autophagy-related 4a	-0.364207	0.000514524	0.00242309
FBgn0031301	CG14339	-	0.529626	0.00151864	0.00633503
FBgn0031313	CG5080	-	0.329371	0.0109341	0.0352988
FBgn0031320	CG5126	-	-0.300969	0.0124964	0.0394781
FBgn0031323	CG5139	-	1.0196	1.66434e-11	4.43353e-10
FBgn0031327	CG5397	-	-0.550737	7.83888e-07	6.919e-06
FBgn0031332	CG5556	-	0.962506	1.10242e-10	2.40079e-09
FBgn0031333	CG5561	-	0.718208	4.79329e-06	3.54356e-05
FBgn0031335	CG5565	-	0.496979	0.00076324	0.00344004
FBgn0031345	CG18132	-	1.00763	2.67616e-10	5.28474e-09
FBgn0031347	CG10869	-	0.728149	5.29902e-09	7.57317e-08
FBgn0031364	CG17648	-	1.0535	0.00718524	0.024588
FBgn0031367	c-cup	calcutta cup	0.450387	0.00166384	0.00687914
FBgn0031372	CG7295	-	0.517779	0.00015054	0.000792438
FBgn0031381	Npc2a	Niemann-Pick type C-2a	-0.422943	0.00147985	0.00618869
FBgn0031384	CG4238	-	-0.634762	1.68786e-08	2.1634e-07
FBgn0031388	CG12674	-	-0.50292	8.34953e-05	0.00046747
FBgn0031389	CG4259	-	-0.967126	1.38443e-09	2.24965e-08
FBgn0031392	AIF	Apoptosis inducing factor	0.380951	0.00120812	0.00515407
FBgn0031395	CG10874	-	-0.498742	2.94489e-06	2.28283e-05
FBgn0031401	papi	papi	0.282044	0.0152615	0.0467679
FBgn0031407	CG4270	-	0.768089	3.43029e-06	2.61731e-05
FBgn0031410	CG17237	-	0.589003	0.000187899	0.000971685
FBgn0031412	CG16995	-	-0.489193	0.000496098	0.0023477
FBgn0031423	CG3557	-	0.748696	4.80064e-07	4.4426e-06
FBgn0031430	CG3528	-	0.68037	0.000181041	0.000939977
FBgn0031432	Cyp309a1	Cyp309a1	-2.13554	3.80461e-63	3.40981e-60
FBgn0031440	CG15395	-	0.349952	0.00620754	0.0216734
FBgn0031441	CG9962	-	-0.576997	0.00111375	0.00480962
FBgn0031442	Prosbeta4R1	Proteasome beta4 subunit-related 1	0.437793	0.0137499	0.0427769
FBgn0031443	Prosbeta4R2	Proteasome beta4 subunit-related 2	0.918253	5.55682e-09	7.87622e-08
FBgn0031444	CG9879	-	0.498029	0.00412344	0.0151553
FBgn0031450	Hrs	Hepatocyte growth factor regulated tyrosine kinase substrate	-0.389836	0.00253591	0.00992474
FBgn0031451	CG9961	-	0.557524	8.11443e-05	0.00045584
FBgn0031457	CG3077	-	-0.288472	0.0136888	0.0426326
FBgn0031462	CG2964	-	0.865615	9.25365e-10	1.5855e-08
FBgn0031476	CG8813	-	1.08018	1.01408e-14	4.82247e-13
FBgn0031483	CG9641	-	-0.560308	7.43381e-07	6.60651e-06
FBgn0031491	alpha4GT1	alpha4GT1	-0.389565	0.000515793	0.00242766
FBgn0031496	CG17258	-	0.523694	0.000328805	0.00161233
FBgn0031501	CG17261	-	0.812085	2.12235e-09	3.297e-08
FBgn0031504	CG15403	-	0.767685	2.98496e-06	2.30928e-05
FBgn0031512	CG15404	-	-3.01241	2.68592e-59	1.8408e-56
FBgn0031514	CG3332	-	0.805419	5.65419e-08	6.39582e-07
FBgn0031515	CG9664	-	-0.458468	0.00113017	0.00487149
FBgn0031517	CG15406	-	-0.624215	1.56753e-07	1.61479e-06
FBgn0031522	CG3285	-	-0.634662	4.97663e-06	3.66516e-05
FBgn0031523	CG15408	-	-0.542007	0.000479716	0.00227603
FBgn0031526	CG8838	-	0.741401	9.17828e-07	8.0102e-06
FBgn0031531	CG8840	-	0.657498	1.69204e-05	0.000110691
FBgn0031534	Snx1	Sorting nexin 1	-0.458881	0.00057704	0.00269247
FBgn0031538	CG3246	-	0.556642	8.0264e-06	5.65049e-05
FBgn0031545	CG3213	-	0.822042	7.44649e-10	1.31653e-08
FBgn0031546	CG8851	-	0.528927	9.09455e-06	6.32978e-05
FBgn0031554	CG15418	-	0.553251	0.00157077	0.00652677
FBgn0031558	CG16704	-	-0.924474	3.47305e-10	6.68835e-09
FBgn0031559	CG3513	-	-2.91552	7.26153e-26	1.0445e-23
FBgn0031560	CG16713	-	-1.85033	7.78453e-10	1.36799e-08
FBgn0031562	CG3604	-	0.556643	0.000814262	0.00364183
FBgn0031566	CG2818	-	-0.358297	0.0012182	0.0051914
FBgn0031574	CG3964	-	0.60432	5.50276e-07	5.02845e-06
FBgn0031575	Cep97	-	0.438674	0.000123858	0.000663173
FBgn0031579	CG15422	-	1.02404	6.29582e-19	5.51524e-17
FBgn0031580	CG15423	-	0.826154	1.51581e-10	3.20385e-09
FBgn0031585	CG2955	-	0.849745	1.88819e-10	3.87994e-09
FBgn0031589	CG3714	-	-0.391537	0.00762389	0.025829
FBgn0031596	CG15429	-	0.777458	3.88828e-06	2.92085e-05
FBgn0031619	CG3355	-	-1.47467	2.09463e-15	1.12984e-13
FBgn0031620	CG11929	-	0.363826	0.00194086	0.00787633
FBgn0031622	CG3251	-	-0.718997	0.00112773	0.00486456
FBgn0031623	Taf12L	TBP-associated factor 30kD subunit alpha-2	-0.553202	4.87142e-05	0.000290168
FBgn0031626	CG15631	-	0.567472	9.06663e-06	6.31413e-05
FBgn0031629	Clect27	C-type lectin 27kD	-0.587712	0.000422539	0.00202759
FBgn0031636	CG12194	-	0.713689	4.76071e-07	4.41265e-06
FBgn0031644	CG15625	-	0.938386	7.37825e-10	1.30644e-08
FBgn0031649	hoe2	hoepel2	0.577609	0.000558321	0.00261245
FBgn0031653	Jon25Biii	Jonah 25Biii	-0.557677	0.00357504	0.0134234
FBgn0031682	CG5828	-	-0.352324	0.00361064	0.0135352
FBgn0031688	Cyp28d2	Cyp28d2	0.652676	0.0137399	0.0427686
FBgn0031689	Cyp28d1	Cyp28d1	-1.43349	1.53272e-30	2.51517e-28
FBgn0031690	CG7742	-	0.548405	2.04036e-06	1.64627e-05
FBgn0031695	Cyp4ac3	Cyp4ac3	1.05451	1.13442e-10	2.46588e-09
FBgn0031702	fusl	fuseless	-0.465854	1.63456e-05	0.000107443
FBgn0031717	Oscillin	Oscillin	-1.00867	3.49988e-15	1.8368e-13
FBgn0031720	CG14013	-	0.681366	5.16859e-06	3.79692e-05
FBgn0031721	CG14017	-	1.16126	6.27192e-10	1.13823e-08
FBgn0031722	CG14011	-	0.592225	1.45319e-05	9.69155e-05
FBgn0031723	CG7251	-	0.8327	2.28239e-11	5.89626e-10
FBgn0031724	CG18266	-	0.768498	5.57428e-11	1.30939e-09
FBgn0031728	Hsp60C	Hsp60C	0.869663	1.72236e-10	3.56433e-09
FBgn0031729	CG12511	-	1.20453	1.31693e-05	8.88968e-05
FBgn0031732	CG11149	-	2.13501	8.8345e-24	1.13111e-21
FBgn0031733	CG14006	-	1.1289	5.22103e-12	1.52457e-10
FBgn0031735	CG11029	-	-0.575191	0.00277965	0.0107701
FBgn0031737	obst-E	obstructor-E	1.20557	1.64806e-05	0.000108238
FBgn0031741	CG11034	-	-0.759544	7.78189e-05	0.000438852
FBgn0031749	CG14000	-	1.43221	3.79502e-15	1.96515e-13
FBgn0031751	CG9016	-	0.995889	4.88071e-15	2.4724e-13
FBgn0031753	CG13999	-	0.656535	0.00281923	0.0109017
FBgn0031757	Ucp4C	Ucp4C	1.04921	2.73283e-13	1.04394e-11
FBgn0031758	Ucp4B	Uncoupling protein 4B	0.970548	2.60254e-07	2.54594e-06
FBgn0031762	CG9098	-	0.367655	0.00483308	0.0174173
FBgn0031784	CG9222	-	0.397893	0.00598499	0.021016
FBgn0031785	CG13991	-	0.68194	3.78795e-08	4.41775e-07
FBgn0031786	CG13989	-	0.68073	1.00339e-05	6.92568e-05
FBgn0031791	AANATL2	Arylalkylamine N-acyltransferase-like 2	-1.48215	6.39008e-12	1.85201e-10
FBgn0031805	CG9505	-	0.99695	2.02051e-08	2.54497e-07
FBgn0031808	CG9507	-	1.24018	0.000577636	0.00269309
FBgn0031813	CG9527	-	0.506844	8.20053e-05	0.00045979
FBgn0031824	CG9547	-	-0.875154	3.29213e-13	1.22938e-11
FBgn0031826	CG9550	-	0.920229	3.95608e-10	7.49468e-09
FBgn0031831	COX5BL	Cytochrome c oxidase subunit 5B-like	0.705125	1.43696e-06	1.20359e-05
FBgn0031849	CG11327	-	0.524068	4.20474e-06	3.14438e-05
FBgn0031853	TTLL3B	Tubulin tyrosine ligase-like 3B	0.62183	1.5207e-07	1.57071e-06
FBgn0031856	CG11322	-	0.859338	1.49544e-10	3.17111e-09
FBgn0031858	CG17378	-	0.589415	1.83218e-06	1.49697e-05
FBgn0031859	CG17377	-	0.839973	4.95031e-11	1.19165e-09
FBgn0031861	CG17375	-	0.613576	1.92138e-05	0.000124298
FBgn0031865	Nha1	Na[+]/H[+] hydrogen antiporter 1	-0.652199	1.48782e-06	1.24085e-05
FBgn0031872	ihog	interference hedgehog	-0.343438	0.0034483	0.013002
FBgn0031874	CG13775	-	-0.559445	0.0103933	0.0338152
FBgn0031878	sip2	septin interacting protein 2	0.452584	9.37165e-05	0.000519206
FBgn0031894	CG4496	-	-0.630176	4.81857e-06	3.56e-05
FBgn0031897	CG13784	-	-0.29014	0.015826	0.0482126
FBgn0031905	gudu	gudu	0.677298	1.11575e-07	1.17964e-06
FBgn0031906	CG5160	-	1.39392	1.92938e-12	6.22694e-11
FBgn0031908	CG5177	-	-0.616815	5.68177e-05	0.000332154
FBgn0031913	CG5958	-	-0.744857	3.56577e-08	4.21018e-07
FBgn0031920	CG6441	-	0.946406	4.10096e-13	1.50253e-11
FBgn0031929	CG18585	-	1.66969	4.63176e-16	2.79609e-14
FBgn0031930	CG7025	-	2.12073	8.33635e-30	1.33051e-27
FBgn0031937	CG13795	-	-0.39923	0.00389412	0.0144262
FBgn0031939	CG13796	-	-0.686668	8.32578e-10	1.44998e-08
FBgn0031940	CG7214	-	-0.88214	2.83134e-09	4.27859e-08
FBgn0031941	ATPsynGL	ATP synthase, subunit G-like	0.4765	0.000357395	0.0017379
FBgn0031945	CG7191	-	0.655942	0.00042635	0.00204336
FBgn0031946	CG7164	-	0.776386	6.68325e-09	9.31418e-08
FBgn0031952	cdc14	cdc14	0.27354	0.0125535	0.0396264
FBgn0031954	CG14537	-	0.561528	0.000964317	0.00423972
FBgn0031957	TwdlE	TweedleE	-1.05378	8.02067e-08	8.74419e-07
FBgn0031969	pes	peste	0.700113	6.74102e-09	9.37226e-08
FBgn0031970	CG7227	-	-0.800573	4.83621e-06	3.56851e-05
FBgn0031973	Spn28Dc	Serpin 28Dc	-0.566376	1.54929e-05	0.000102678
FBgn0031976	CG7367	-	-0.454522	0.00924354	0.0304056
FBgn0031981	CG7466	-	-0.335624	0.00246758	0.00969309
FBgn0031990	PAPLA1	Phosphatidic Acid Phospholipase A1	0.510768	5.76356e-06	4.19958e-05
FBgn0031992	CG8498	-	-0.443592	0.00048998	0.00232158
FBgn0031995	CG8475	-	-0.308141	0.00580947	0.0204799
FBgn0031996	CG8460	-	-0.309983	0.00516919	0.0184856
FBgn0032000	CG8372	-	-0.330414	0.00231789	0.00918249
FBgn0032003	CG8349	-	0.684116	6.92175e-07	6.20348e-06
FBgn0032004	CG8292	-	0.830489	1.19784e-08	1.58591e-07
FBgn0032006	Pvr	PDGF- and VEGF-receptor related	-0.300371	0.0138781	0.0430838
FBgn0032010	CG8086	-	0.400379	0.00030562	0.0015088
FBgn0032022	CG14275	-	-0.622282	1.55215e-06	1.28896e-05
FBgn0032026	CG7627	-	-0.445774	0.00013084	0.000698631
FBgn0032036	CG13384	-	-0.418847	0.000793623	0.0035632
FBgn0032039	CG13385	-	0.866801	6.68711e-10	1.19352e-08
FBgn0032047	CG13088	-	0.397865	0.00143324	0.00600871
FBgn0032049	Bace	beta-site APP-cleaving enzyme	3.16762	1.1442e-60	8.88738e-58
FBgn0032061	CG9314	-	0.644778	1.06159e-07	1.12852e-06
FBgn0032065	CG12438	-	0.881345	1.02373e-07	1.09226e-06
FBgn0032069	LManVI	Lysosomal alpha-mannosidase VI	1.48584	0.00143319	0.00600871
FBgn0032072	CG9483	-	0.798915	6.44887e-05	0.000371592
FBgn0032074	Tsp29Fa	Tetraspanin 29Fa	0.576462	2.03163e-05	0.000130994
FBgn0032075	Tsp29Fb	Tetraspanin 29Fb	0.62041	4.82682e-06	3.56384e-05
FBgn0032078	C1GalTA	Core 1 Galactosyltransferase A	-0.415068	0.000165913	0.000866839
FBgn0032084	CG13101	-	-1.10588	2.20389e-07	2.18905e-06
FBgn0032085	CG9555	-	0.96901	0.000439811	0.00210119
FBgn0032087	CG9568	-	2.10189	8.81667e-41	2.85342e-38
FBgn0032088	CG13102	-	2.12161	3.09722e-32	5.38592e-30
FBgn0032089	Rcd-1r	Rcd-1 related	-0.701659	3.66341e-05	0.000225952
FBgn0032090	CG9582	-	0.998142	6.90729e-08	7.66446e-07
FBgn0032109	CG17005	-	0.85111	4.51397e-09	6.55763e-08
FBgn0032110	CG3748	-	1.26975	6.10317e-13	2.15479e-11
FBgn0032111	CG13110	-	0.854811	9.87367e-09	1.333e-07
FBgn0032115	CG4438	-	0.326355	0.0164918	0.049908
FBgn0032116	Mco1	Multicopper oxidase-1	0.798276	2.48472e-07	2.44299e-06
FBgn0032117	FucTB	FucTB	0.580974	2.44876e-06	1.92904e-05
FBgn0032120	CG33298	-	-0.277267	0.0144705	0.0446376
FBgn0032131	CG3841	-	0.698016	0.000173285	0.000902118
FBgn0032132	CG4382	-	-0.636201	0.000103122	0.000565934
FBgn0032136	Apoltp	Apolipoprotein lipid transfer particle	0.843277	1.60869e-07	1.65096e-06
FBgn0032139	CG13116	-	-0.740466	2.61099e-06	2.04853e-05
FBgn0032144	CG17633	-	1.28005	1.48623e-14	6.81736e-13
FBgn0032151	nAChRalpha6	nicotinic Acetylcholine Receptor alpha6	0.318495	0.0162109	0.0491986
FBgn0032153	CG4537	-	-0.640969	0.00461264	0.0167472
FBgn0032156	CG13124	-	0.330486	0.00384389	0.0142628
FBgn0032163	TbCMF46	TbCMF46	2.44278	9.60856e-11	2.13644e-09
FBgn0032172	CG5850	-	-0.274473	0.0134207	0.0419883
FBgn0032175	CG13131	-	0.557705	2.30169e-05	0.000147104
FBgn0032176	CG13127	-	0.448818	0.0103263	0.0336068
FBgn0032187	CG4839	-	0.332208	0.00293458	0.0112878
FBgn0032192	CG5731	-	-0.470421	0.0019097	0.00777427
FBgn0032197	CG5694	-	-0.284834	0.00774333	0.0261728
FBgn0032202	CG18619	-	-0.303837	0.00717878	0.0245783
FBgn0032204	CG4953	-	-0.377361	0.00266473	0.010394
FBgn0032213	CG5390	-	-0.464132	0.000289465	0.00143636
FBgn0032219	CG4995	-	0.733891	5.25302e-09	7.52804e-08
FBgn0032230	lft	lowfat	-0.37951	0.000677718	0.00310015
FBgn0032235	CG5096	-	0.861931	1.02592e-13	4.20878e-12
FBgn0032250	holn1	hole-in-one	-0.309346	0.0162972	0.0494476
FBgn0032253	LManI	Lysosomal alpha-mannosidase I	-1.3968	1.74377e-28	2.67325e-26
FBgn0032264	Lip4	Lipase 4	0.648856	4.67835e-07	4.34669e-06
FBgn0032268	CG6138	-	0.774763	1.42743e-06	1.19647e-05
FBgn0032269	w-cup	world cup	0.893476	3.35058e-12	1.03002e-10
FBgn0032271	CG7329	-	1.05817	8.40536e-05	0.000470143
FBgn0032276	CG17098	-	0.526179	1.57457e-05	0.000104117
FBgn0032280	CG17105	-	-2.06071	8.17608e-06	5.73853e-05
FBgn0032281	CG17107	-	0.819525	0.00134721	0.00570096
FBgn0032282	CG7299	-	1.41517	1.45558e-13	5.86815e-12
FBgn0032285	CG17108	-	-0.410775	0.00249228	0.00976708
FBgn0032287	CG6415	-	-0.592546	0.000403792	0.00194404
FBgn0032291	CG17118	-	0.87603	3.17299e-09	4.75786e-08
FBgn0032304	CG17134	-	1.29961	5.73951e-06	4.18729e-05
FBgn0032312	CG14071	-	1.01837	4.96361e-10	9.22346e-09
FBgn0032314	CG7309	-	0.694185	2.00521e-09	3.12754e-08
FBgn0032336	AstC	Allatostatin C	0.681894	0.00131591	0.00557718
FBgn0032345	CG14921	-	0.383172	0.00714207	0.0244742
FBgn0032350	CG6287	-	-0.775318	2.60949e-07	2.54846e-06
FBgn0032358	Ppt2	Palmitoyl-protein Thioesterase 2	-0.767729	4.48653e-13	1.61623e-11
FBgn0032360	CG14926	-	0.904487	2.27825e-12	7.17403e-11
FBgn0032364	CG4970	-	0.606363	2.90849e-05	0.000182777
FBgn0032365	CG14929	-	1.0985	3.78024e-06	2.84703e-05
FBgn0032369	CG6614	-	0.532404	0.00034735	0.001694
FBgn0032370	CG12307	-	1.093	7.71702e-15	3.80979e-13
FBgn0032371	CG4983	-	0.692246	1.17791e-07	1.2375e-06
FBgn0032372	CG4988	-	0.502252	0.000358266	0.00174141
FBgn0032373	Vha100-5	Vacuolar H[+] ATPase 100kD subunit 5	0.407832	0.00361352	0.0135417
FBgn0032374	CG14931	-	0.769655	1.76906e-06	1.4515e-05
FBgn0032376	Tsp33B	Tetraspanin 33B	0.622891	1.27724e-06	1.08147e-05
FBgn0032382	Mal-B2	Maltase B2	-1.3878	3.91615e-32	6.70986e-30
FBgn0032385	CG16964	-	0.801621	1.76901e-05	0.000115278
FBgn0032397	Tom70	Translocase of outer membrane 70	0.350257	0.00136447	0.00576202
FBgn0032400	CG6770	-	-0.730547	7.28939e-05	0.000413278
FBgn0032402	CG14945	-	-0.456171	0.00234261	0.00926782
FBgn0032405	CG14946	-	-0.942661	4.89534e-12	1.43666e-10
FBgn0032409	Ced-12	Ced-12	-0.362698	0.00192758	0.00783063
FBgn0032419	CG17217	-	1.16774	6.73241e-09	9.37149e-08
FBgn0032421	crok	crooked	-0.319851	0.00631553	0.0219977
FBgn0032422	atilla	atilla	0.631528	8.4146e-05	0.000470425
FBgn0032424	CG17010	-	0.77403	9.04949e-09	1.23394e-07
FBgn0032429	CG5446	-	-0.318628	0.00397998	0.0147115
FBgn0032431	CG5435	-	0.984534	6.39695e-10	1.15194e-08
FBgn0032434	CG5421	-	-0.420657	0.0107254	0.0347695
FBgn0032435	Oatp33Eb	Organic anion transporting polypeptide 33Eb	1.59359	4.53151e-34	8.79944e-32
FBgn0032448	CG5781	-	0.618375	0.000632526	0.00291864
FBgn0032457	CG15483	-	0.849889	7.61536e-07	6.74101e-06
FBgn0032464	Vha68-3	Vacuolar H[+] ATPase 68kD subunit 3	0.610183	3.31128e-07	3.16486e-06
FBgn0032467	CG9934	-	-0.442255	0.00290355	0.0111906
FBgn0032471	CG5122	-	0.844355	4.27144e-12	1.2728e-10
FBgn0032473	CG5204	-	-0.603637	8.04772e-05	0.000452748
FBgn0032478	CG5458	-	0.779862	6.35139e-10	1.14729e-08
FBgn0032481	CG16972	-	0.647399	1.04586e-06	9.04627e-06
FBgn0032483	CG15482	-	0.894849	3.41232e-09	5.07752e-08
FBgn0032485	CG9426	-	-0.362378	0.000668281	0.0030642
FBgn0032492	Prosalpha6T	Proteasome alpha6 subunit, Testis-specific	0.805193	4.0244e-08	4.6748e-07
FBgn0032495	CG16820	-	0.623457	7.10307e-06	5.07717e-05
FBgn0032499	Uvrag	UV-resistance associated gene	-0.489657	1.28212e-05	8.67981e-05
FBgn0032503	CG16825	-	0.629371	8.14016e-06	5.72021e-05
FBgn0032515	loqs	loquacious	0.264727	0.0155908	0.0476144
FBgn0032519	CG16957	-	0.975001	1.30235e-09	2.13714e-08
FBgn0032520	CG10859	-	0.706788	5.06622e-08	5.78125e-07
FBgn0032522	CG16848	-	0.692114	1.1964e-06	1.01761e-05
FBgn0032525	Hsp60D	Hsp60D	0.814458	1.64765e-09	2.61892e-08
FBgn0032530	CG9263	-	0.411501	0.00347096	0.0130747
FBgn0032533	CG16888	-	1.15292	1.19658e-06	1.01761e-05
FBgn0032536	Ance-3	Ance-3	0.751914	0.00255209	0.00998132
FBgn0032553	CG4480	-	0.423218	0.00323549	0.0122831
FBgn0032554	CG15278	-	0.681308	8.72215e-05	0.000485764
FBgn0032563	CG15258	-	0.629291	1.77093e-05	0.000115333
FBgn0032577	CG13244	-	0.544637	0.00139996	0.00588842
FBgn0032587	CG5953	-	-0.367932	0.000929756	0.00410173
FBgn0032588	CG5968	-	0.765558	1.09727e-07	1.1622e-06
FBgn0032590	CG4631	-	0.671203	7.53944e-08	8.27917e-07
FBgn0032601	yellow-b	yellow-b	-0.944856	1.2257e-12	4.0802e-11
FBgn0032603	CG17928	-	-0.488249	0.00109975	0.00475712
FBgn0032609	CG13280	-	0.882917	2.06703e-09	3.21965e-08
FBgn0032614	CG13284	-	-0.761096	0.000160346	0.000840392
FBgn0032615	CG6012	-	-0.688584	3.28802e-07	3.14522e-06
FBgn0032624	CG6304	-	0.582905	4.08286e-07	3.8549e-06
FBgn0032626	CG12620	-	0.639548	2.09227e-07	2.09245e-06
FBgn0032632	CG6380	-	0.887045	2.74105e-14	1.20969e-12
FBgn0032636	CG5043	-	0.443646	0.000146828	0.000774418
FBgn0032637	CG5050	-	0.627181	9.48137e-08	1.02096e-06
FBgn0032638	SPH93	-	-1.39144	1.42713e-15	8.03258e-14
FBgn0032639	CG18563	-	-0.922378	2.29684e-09	3.53041e-08
FBgn0032642	CG5110	-	-0.407076	0.00107955	0.004681
FBgn0032648	CG15144	-	0.626304	2.78334e-06	2.16624e-05
FBgn0032649	CG15145	-	0.766741	3.23912e-09	4.83833e-08
FBgn0032650	CG7094	-	0.699704	1.55274e-07	1.60239e-06
FBgn0032652	CG6870	-	-1.88877	1.66989e-36	3.97058e-34
FBgn0032654	CG15147	-	0.615037	0.000357098	0.00173718
FBgn0032663	CG15153	-	-0.667726	3.71335e-05	0.00022879
FBgn0032664	CG5755	-	0.995351	6.62832e-12	1.91629e-10
FBgn0032677	CG5790	-	0.687751	7.3794e-08	8.11873e-07
FBgn0032682	CG10176	-	-0.292434	0.012939	0.040645
FBgn0032684	CG10178	-	-0.726646	1.60975e-05	0.000106021
FBgn0032699	CG10383	-	0.307568	0.00709989	0.0243655
FBgn0032700	CG10338	-	-0.430311	0.00058032	0.00270128
FBgn0032706	Irk3	Inwardly rectifying potassium channel 3	0.425941	0.00104661	0.00455341
FBgn0032709	CG15167	-	1.15133	7.94119e-06	5.59832e-05
FBgn0032713	CG17323	-	-0.928595	9.51421e-14	3.93085e-12
FBgn0032715	CG17597	-	0.350267	0.00400447	0.0147786
FBgn0032717	CG10600	-	0.344817	0.00218644	0.00872406
FBgn0032725	Nedd8	Nedd8	-0.266541	0.0142927	0.0441714
FBgn0032726	CG10621	-	-0.943047	4.3016e-12	1.27852e-10
FBgn0032727	CG10623	-	-0.449472	0.000625703	0.00289288
FBgn0032731	Swip-1	Swiprosin-1	-0.379429	0.00264002	0.0103149
FBgn0032733	CG15170	-	0.631891	2.75417e-08	3.35306e-07
FBgn0032740	CG15172	-	0.388911	0.0046877	0.0169669
FBgn0032754	CG10700	-	1.27184	2.59091e-05	0.000164684
FBgn0032763	CG17568	-	-0.436384	0.0015593	0.00648605
FBgn0032768	CG17564	-	0.860783	9.37588e-11	2.09671e-09
FBgn0032769	CG10750	-	0.6803	3.23982e-05	0.000201856
FBgn0032771	CG17349	-	0.735952	7.85463e-09	1.08045e-07
FBgn0032779	CG16771	-	1.10589	7.99883e-07	7.04417e-06
FBgn0032783	CG10237	-	-0.814195	0.000724152	0.00327909
FBgn0032785	CG10026	-	-0.418313	0.00110604	0.0047816
FBgn0032793	CG10189	-	-0.429006	0.00128658	0.00546283
FBgn0032801	CG10165	-	0.778287	0.000512075	0.00241546
FBgn0032803	CG13082	-	-0.550862	0.0135469	0.0423148
FBgn0032805	CG10337	-	-0.49385	0.0128239	0.0403487
FBgn0032840	sNPF	short neuropeptide F precursor	0.578273	0.00178643	0.00732877
FBgn0032846	CG10721	-	-0.364488	0.00298193	0.0114435
FBgn0032850	Kua	Kua	1.25454	8.60423e-12	2.43912e-10
FBgn0032857	CG10947	-	0.66879	5.09842e-05	0.000301992
FBgn0032867	CG15475	-	0.858232	1.47629e-08	1.92396e-07
FBgn0032869	CG17470	-	0.847161	8.12809e-12	2.32109e-10
FBgn0032871	CG2611	-	-0.576094	3.41942e-05	0.000212365
FBgn0032876	Cen	Centrocortin	-0.35936	0.00165787	0.00685688
FBgn0032878	CG9316	-	0.674971	3.40454e-06	2.60176e-05
FBgn0032894	CG14402	-	0.677267	1.51202e-05	0.000100436
FBgn0032897	CG9336	-	-0.477098	0.000110239	0.000599343
FBgn0032900	CG14401	-	-0.331897	0.00718883	0.024591
FBgn0032910	CG9265	-	-0.847327	1.14748e-09	1.90175e-08
FBgn0032913	CG9259	-	1.0511	2.19077e-07	2.17787e-06
FBgn0032916	CG9257	-	-0.297831	0.0144796	0.0446537
FBgn0032934	CG8679	-	-0.919407	4.67495e-13	1.66568e-11
FBgn0032935	Atg18b	Autophagy-related 18b	-0.455232	0.000217246	0.0011053
FBgn0032955	CG2201	-	-0.474418	0.000194915	0.00100441
FBgn0032964	CG11630	-	0.577463	7.62955e-05	0.000430469
FBgn0032965	CG11629	-	0.681793	0.0061043	0.0213641
FBgn0032968	CG11634	-	0.876046	3.05497e-08	3.67743e-07
FBgn0032969	CG2528	-	0.656914	9.32687e-08	1.00618e-06
FBgn0032971	ttm3	tiny tim 3	0.965774	3.92418e-09	5.78011e-08
FBgn0032972	CG10834	-	1.08541	1.58774e-07	1.63273e-06
FBgn0032981	CG3635	-	1.72263	1.40476e-08	1.83691e-07
FBgn0033020	COX4L	Cytochrome c oxidase subunit 4-like	0.669601	7.04019e-08	7.8045e-07
FBgn0033031	CG8245	-	0.513943	0.000106888	0.000584125
FBgn0033048	CG7881	-	2.54035	1.69598e-13	6.74399e-12
FBgn0033056	CG7856	-	0.572331	1.93434e-05	0.000125066
FBgn0033063	CG14589	-	0.659625	2.45966e-07	2.4204e-06
FBgn0033074	tomboy40	tomboy40	0.85037	1.5122e-11	4.06897e-10
FBgn0033075	Pld	Phospholipase D	-0.294925	0.0108897	0.0352042
FBgn0033086	CG9410	-	0.501993	0.000239544	0.00121035
FBgn0033090	CG15909	-	1.19047	1.32114e-11	3.60483e-10
FBgn0033093	CG3270	-	-0.353841	0.00194573	0.00789062
FBgn0033101	CG9436	-	-0.353466	0.000966385	0.00424561
FBgn0033108	CG15236	-	0.488304	0.000150399	0.000792179
FBgn0033124	Tsp42Ec	Tetraspanin 42Ec	0.629828	4.70069e-07	4.36397e-06
FBgn0033127	Tsp42Ef	Tetraspanin 42Ef	-0.266077	0.0134878	0.0421542
FBgn0033130	Tsp42Ei	Tetraspanin 42Ei	-0.338653	0.00815209	0.027301
FBgn0033132	Tsp42Ej	Tetraspanin 42Ej	-0.685812	2.69035e-09	4.09207e-08
FBgn0033137	Tsp42Ep	Tetraspanin 42Ep	-0.600662	2.11665e-06	1.6996e-05
FBgn0033138	Tsp42Eq	Tetraspanin 42Eq	0.438523	0.000862863	0.00383564
FBgn0033139	Tsp42Er	Tetraspanin 42Er	0.282883	0.00637853	0.0221906
FBgn0033141	CG12831	-	0.846642	1.5878e-09	2.52724e-08
FBgn0033149	CG11060	-	0.801797	4.59928e-10	8.61515e-09
FBgn0033153	Gadd45	Gadd45	-0.644748	3.98867e-06	2.99048e-05
FBgn0033154	CG1850	-	-1.36771	2.73227e-05	0.000173156
FBgn0033168	CG11145	-	0.605501	0.000798831	0.00357969
FBgn0033174	CG11125	-	0.594444	6.13777e-07	5.5478e-06
FBgn0033184	CG12736	-	0.418286	0.000119709	0.000643624
FBgn0033190	CG2137	-	0.917641	2.85406e-11	7.20517e-10
FBgn0033199	CG17985	-	-0.351048	0.00801176	0.0269006
FBgn0033203	CG2070	-	-2.84221	0.00234468	0.00927287
FBgn0033226	CG1882	-	0.362754	0.000844294	0.00375884
FBgn0033234	MFS12	Major Facilitator Superfamily Transporter 12	0.783648	8.93354e-05	0.000496824
FBgn0033238	CG11165	-	1.11623	3.9054e-12	1.17273e-10
FBgn0033248	Dic3	Dicarboxylate carrier 3	1.08048	6.50895e-09	9.09302e-08
FBgn0033272	RagC-D	Ras-related GTP binding C/D ortholog (H. sapiens)	-0.3455	0.00149137	0.00622794
FBgn0033274	CG14757	-	0.467795	0.000676184	0.00309679
FBgn0033278	CG14759	-	1.19321	5.30482e-07	4.86665e-06
FBgn0033279	CG2291	-	0.755173	3.60283e-08	4.243e-07
FBgn0033280	CG12126	-	0.576301	0.000475928	0.00225959
FBgn0033283	CG11635	-	0.483082	0.000364912	0.00176964
FBgn0033285	CG18449	-	0.898352	1.83268e-13	7.21372e-12
FBgn0033286	CG2127	-	0.841575	1.03472e-09	1.75225e-08
FBgn0033287	CG8701	-	0.915049	1.1105e-11	3.10275e-10
FBgn0033289	CG2121	-	-0.527396	0.000324702	0.00159625
FBgn0033292	Cyp4ad1	Cyp4ad1	0.423464	0.00232586	0.00921096
FBgn0033302	Cyp6a14	Cyp6a14	0.484448	5.65471e-05	0.00033107
FBgn0033303	Cyp6a15Psi	Cyp6a15Psi	0.963922	0.001046	0.00455248
FBgn0033304	Cyp6a13	Cyp6a13	0.306309	0.0148612	0.0456854
FBgn0033315	beta3GalTII	Galactosyltransferase II	-0.494479	0.00239021	0.00941656
FBgn0033320	CG8586	-	-2.11729	3.45561e-57	2.23674e-54
FBgn0033321	CG8738	-	-0.963952	1.81092e-11	4.78267e-10
FBgn0033322	CG8584	-	0.694511	9.54963e-05	0.000528044
FBgn0033323	CG12376	-	0.597874	2.14872e-06	1.71942e-05
FBgn0033330	CG8746	-	0.817794	2.77316e-09	4.19611e-08
FBgn0033344	CG8252	-	0.912696	1.9681e-08	2.48702e-07
FBgn0033355	CG13748	-	-1.22168	8.54551e-05	0.000476838
FBgn0033356	CG8229	-	-0.549017	1.61351e-05	0.000106209
FBgn0033364	CG13747	-	0.691012	9.43306e-09	1.27945e-07
FBgn0033365	CG8170	-	-0.456011	0.00699944	0.0240775
FBgn0033367	PPO2	Prophenoloxidase 2	-2.46193	2.52934e-46	1.01619e-43
FBgn0033369	CG8197	-	0.66225	9.37455e-06	6.50523e-05
FBgn0033371	CNT1	Concentrative Nucleoside Transporter 1	0.860157	4.51825e-11	1.1013e-09
FBgn0033373	CG8080	-	-0.44472	5.28872e-05	0.000312153
FBgn0033382	Hydr1	alpha/beta hydrolase 1	0.482164	9.10615e-05	0.000505459
FBgn0033387	CG8008	-	-0.668206	2.73459e-05	0.000173156
FBgn0033388	CG8046	-	-0.576833	0.000526073	0.00247248
FBgn0033397	Cyp4p3	Cyp4p3	0.98129	4.10065e-07	3.86848e-06
FBgn0033408	CG8800	-	0.676552	0.0165337	0.0499828
FBgn0033423	CG1809	-	1.73496	4.21737e-36	9.63463e-34
FBgn0033437	CG12926	-	-0.712076	3.91205e-08	4.54883e-07
FBgn0033438	Mmp2	Matrix metalloproteinase 2	-0.615993	7.26553e-06	5.16477e-05
FBgn0033442	CG1690	-	0.390382	0.000664683	0.00305011
FBgn0033443	CG1698	-	-0.336893	0.00319882	0.0121557
FBgn0033448	hebe	hebe	1.08783	2.07937e-15	1.12682e-13
FBgn0033451	CG1665	-	-0.315574	0.00952022	0.0312627
FBgn0033461	CG12923	-	0.832986	5.54162e-08	6.27458e-07
FBgn0033465	Etf-QO	Electron transfer flavoprotein-ubiquinone oxidoreductase	-0.373777	0.000568269	0.00265473
FBgn0033468	CG1418	-	0.378882	0.000772591	0.00347681
FBgn0033490	CG12917	-	0.605801	0.00241566	0.00950841
FBgn0033494	KCNQ	KCNQ potassium channel	-0.364624	0.00488264	0.0175742
FBgn0033498	CG12209	-	0.651083	7.04062e-06	5.03871e-05
FBgn0033502	CG12910	-	0.422542	0.00385609	0.0143035
FBgn0033504	CAP	CAP	0.468645	0.000139964	0.000741909
FBgn0033518	Prx2540-2	Peroxiredoxin 2540-2	0.844364	4.62862e-05	0.00027798
FBgn0033524	Cyp49a1	Cyp49a1	0.614225	0.00579916	0.020456
FBgn0033541	CG12934	-	0.342565	0.00495881	0.0178153
FBgn0033542	CG12309	-	0.704743	1.40152e-08	1.83679e-07
FBgn0033543	CG12338	-	-0.285851	0.00840812	0.0280536
FBgn0033550	CG12341	-	-0.313018	0.0093109	0.0306185
FBgn0033574	Spn47C	Serpin 47C	0.578795	2.56514e-06	2.01391e-05
FBgn0033582	CG9084	-	-0.3058	0.0136789	0.0426246
FBgn0033589	CG13227	-	-0.612133	0.00663756	0.0229653
FBgn0033598	Cpr47Eb	Cuticular protein 47Eb	1.31623	6.00384e-08	6.75853e-07
FBgn0033600	Cpr47Ec	Cuticular protein 47Ec	1.66135	2.15437e-07	2.1527e-06
FBgn0033610	CG18335	-	0.629633	5.9983e-07	5.43439e-06
FBgn0033628	CG13203	-	1.06145	3.20345e-06	2.46522e-05
FBgn0033631	Sod3	Superoxide dismutase 3	-0.504957	6.05648e-05	0.00035194
FBgn0033635	CG7777	-	-0.703888	3.4086e-08	4.04415e-07
FBgn0033638	CG9005	-	-0.575464	4.15813e-05	0.000252983
FBgn0033639	CG9003	-	-0.39813	0.00531453	0.0189414
FBgn0033644	Tret1-2	Trehalose transporter 1-2	0.536455	0.00230172	0.00912465
FBgn0033654	Sobp	Sine oculis-binding protein	-0.669542	1.17925e-06	1.00435e-05
FBgn0033659	Damm	Death associated molecule related to Mch2 caspase	2.80676	3.851e-38	1.09434e-35
FBgn0033665	Zip48C	Zinc/iron regulated transporter-related protein 48C	-0.353949	0.014711	0.0452477
FBgn0033680	CG13186	-	0.731349	3.19633e-05	0.000199466
FBgn0033687	CG8407	-	0.671422	4.71854e-05	0.000282652
FBgn0033692	wash	washout	0.305352	0.00548442	0.0194933
FBgn0033702	CG8854	-	0.606468	0.00180632	0.00740515
FBgn0033705	CG13168	-	0.825496	2.91449e-10	5.71662e-09
FBgn0033706	Vha36-2	Vacuolar H[+] ATPase 36kD subunit 2	1.09936	1.38026e-10	2.95072e-09
FBgn0033710	CG17739	-	-0.359985	0.00979965	0.0320809
FBgn0033720	CG13160	-	1.29419	1.12032e-06	9.61184e-06
FBgn0033723	CG13155	-	-1.29273	1.25477e-05	8.52437e-05
FBgn0033724	CG8501	-	-0.869181	2.01318e-13	7.87099e-12
FBgn0033725	Cpr49Ac	Cuticular protein 49Ac	-0.88111	0.000106316	0.000581271
FBgn0033730	Cpr49Ag	Cuticular protein 49Ag	-0.61744	1.99514e-06	1.61314e-05
FBgn0033731	Cpr49Ah	Cuticular protein 49Ah	1.64879	7.79793e-10	1.36828e-08
FBgn0033744	Dh44-R2	Diuretic hormone 44 receptor 2	0.350669	0.0085466	0.0284667
FBgn0033748	vis	vismay	-0.389516	0.00372583	0.0138867
FBgn0033749	achi	achintya	-0.327549	0.010945	0.0353241
FBgn0033750	CG13151	-	-0.343332	0.0122203	0.0387375
FBgn0033755	ClC-b	Chloride channel-b	-0.296105	0.00629851	0.021945
FBgn0033756	CG17760	-	-0.898084	6.84379e-06	4.90991e-05
FBgn0033757	muskelin	muskelin	-0.385841	0.0016532	0.00684
FBgn0033760	CG8785	-	-0.754095	0.000102068	0.000561224
FBgn0033761	CG8778	-	-0.393827	0.00306488	0.0117309
FBgn0033763	CG8646	-	-0.612345	0.00121685	0.00518941
FBgn0033770	wuc	Wake-up-call	-0.730796	0.000292789	0.00145191
FBgn0033775	Cyp9h1	Cyp9h1	-0.790868	1.07998e-09	1.81571e-08
FBgn0033777	CG17574	-	0.333294	0.00363127	0.0135776
FBgn0033782	sug	sugarbabe	0.968783	4.41337e-15	2.2652e-13
FBgn0033783	CG17019	-	0.327642	0.00222728	0.00885969
FBgn0033787	CG13321	-	0.584701	1.08367e-06	9.33866e-06
FBgn0033788	CG13323	-	0.837057	1.38442e-06	1.16461e-05
FBgn0033789	CG13324	-	1.43033	4.67462e-09	6.76572e-08
FBgn0033794	CG13326	-	0.732798	3.2876e-07	3.14522e-06
FBgn0033799	GLaz	Glial Lazarillo	-0.41686	0.012637	0.0398145
FBgn0033807	AQP	aquaporin	0.655419	0.000617313	0.00285977
FBgn0033818	CG4712	-	0.767265	5.21166e-09	7.47796e-08
FBgn0033819	CG4714	-	0.86421	1.40215e-11	3.80802e-10
FBgn0033820	CG4716	-	2.66506	2.05951e-26	2.99942e-24
FBgn0033826	CG4734	-	1.21913	5.83033e-12	1.69399e-10
FBgn0033828	CG17048	-	0.77053	3.54214e-05	0.000219402
FBgn0033834	CG4744	-	0.509188	6.91047e-05	0.000394097
FBgn0033848	CG13330	-	0.76414	1.26768e-08	1.67078e-07
FBgn0033856	CG13334	-	0.863925	0.000113688	0.000615224
FBgn0033860	S-Lap5	Sperm-Leucylaminopeptidase 5	0.579586	1.72533e-05	0.000112741
FBgn0033861	CG12464	-	1.05022	1.49484e-07	1.5495e-06
FBgn0033862	CG6209	-	0.900843	4.36021e-12	1.29264e-10
FBgn0033863	CG13337	-	0.944396	1.17007e-12	3.94004e-11
FBgn0033864	CG18368	-	0.823411	4.69039e-08	5.36815e-07
FBgn0033865	CG6220	-	-0.517782	0.000513251	0.00241954
FBgn0033868	S-Lap7	Sperm-Leucylaminopeptidase 7	0.834175	3.76683e-08	4.40635e-07
FBgn0033873	CG6337	-	1.58333	3.44396e-18	2.7865e-16
FBgn0033875	CG6357	-	-0.67781	1.13914e-09	1.89061e-08
FBgn0033879	CG6543	-	-0.275176	0.0120391	0.0382913
FBgn0033888	CG18568	-	0.654637	6.34026e-08	7.10293e-07
FBgn0033893	CG18371	-	0.728215	1.22794e-05	8.35671e-05
FBgn0033900	CG8257	-	0.431697	6.88312e-05	0.000392921
FBgn0033926	Arc1	Activity-regulated cytoskeleton associated protein 1	-0.790674	6.40109e-06	4.62076e-05
FBgn0033929	Tfb1	TFB1 ortholog (S. cerevisiae)	-0.265784	0.0126049	0.0397562
FBgn0033936	CG17386	-	-0.815218	2.96639e-07	2.85868e-06
FBgn0033942	Cpr51A	Cuticular protein 51A	-0.814704	8.99911e-09	1.22917e-07
FBgn0033949	CG10131	-	-1.07387	5.15379e-21	5.4588e-19
FBgn0033952	Adgf-E	Adenosine deaminase-related growth factor E	0.958953	1.84602e-12	6.00782e-11
FBgn0033953	CG12861	-	0.935947	8.4384e-14	3.49878e-12
FBgn0033954	CG12860	-	0.980108	4.49454e-13	1.61623e-11
FBgn0033955	CG12866	-	0.748978	4.46062e-06	3.31869e-05
FBgn0033958	CG12858	-	0.556727	0.00239071	0.00941656
FBgn0033960	CG10151	-	-0.604248	5.9077e-06	4.29386e-05
FBgn0033963	CG12857	-	0.441648	0.000746792	0.00337374
FBgn0033969	CG10202	-	0.752195	1.04348e-07	1.11028e-06
FBgn0033973	HPS1	Hermansky-Pudlak Syndrome 1 ortholog (H. sapiens)	-0.37374	0.00420216	0.0154154
FBgn0033978	Cyp6a23	Cyp6a23	1.56033	1.18156e-17	8.93917e-16
FBgn0033981	Cyp6a21	Cyp6a21	-0.589889	0.00070046	0.00318542
FBgn0033982	Cyp317a1	Cyp317a1	0.353456	0.0158655	0.048276
FBgn0033988	pcs	parcas	-0.369889	0.001623	0.00672461
FBgn0033999	CG8093	-	-1.25091	2.78722e-13	1.06124e-11
FBgn0034007	ND-51L2	NADH dehydrogenase (ubiquinone) 51 kDa subunit-like 2	0.889141	5.68732e-06	4.15182e-05
FBgn0034010	CG8157	-	-1.50617	5.03985e-10	9.33534e-09
FBgn0034011	CG8160	-	-1.84202	2.9598e-06	2.29286e-05
FBgn0034021	CG8180	-	-0.35368	0.00174496	0.00717632
FBgn0034029	eIF2B-gamma	eIF2B-gamma	-0.285827	0.0154798	0.0473373
FBgn0034032	CG8195	-	-0.555876	2.22917e-06	1.77671e-05
FBgn0034035	CG8207	-	-0.281478	0.0135868	0.0424056
FBgn0034052	CG8299	-	0.85376	1.31805e-11	3.60483e-10
FBgn0034075	Asph	Aspartyl beta-hydroxylase	-0.517524	0.00167319	0.00690973
FBgn0034082	CG10734	-	0.867512	3.01013e-13	1.13498e-11
FBgn0034084	CG8435	-	-0.345392	0.00713147	0.024445
FBgn0034093	CG15706	-	-0.583782	2.50887e-08	3.08342e-07
FBgn0034094	Tsf3	Transferrin 3	-0.495698	8.72992e-05	0.000485964
FBgn0034095	CG15701	-	-0.540876	0.00206393	0.00829203
FBgn0034097	CG3687	-	0.453507	0.00247557	0.00971466
FBgn0034099	CG15708	-	0.803119	2.79745e-07	2.70707e-06
FBgn0034104	CG15705	-	0.990145	7.59546e-07	6.73476e-06
FBgn0034105	CG7755	-	0.804825	2.2183e-08	2.76718e-07
FBgn0034114	CG4282	-	-0.381616	0.00585303	0.0206023
FBgn0034117	CG7997	-	-0.337651	0.00318816	0.0121271
FBgn0034121	CG6262	-	0.757683	1.08228e-09	1.81696e-08
FBgn0034122	CG15711	-	0.829256	9.39691e-06	6.51687e-05
FBgn0034127	CG7848	-	0.414143	0.00143371	0.00600871
FBgn0034129	CG15925	-	0.91605	4.62862e-06	3.43054e-05
FBgn0034132	S-Lap8	Sperm-Leucylaminopeptidase 8	0.805077	2.836e-08	3.43474e-07
FBgn0034133	CG7813	-	0.816227	6.27366e-11	1.45029e-09
FBgn0034135	Syn2	Syntrophin-like 2	0.651929	0.00136818	0.00577352
FBgn0034139	CG4927	-	-0.738365	9.62434e-06	6.65084e-05
FBgn0034144	CG5089	-	0.780939	4.24824e-09	6.21032e-08
FBgn0034156	CG5348	-	0.902523	9.29355e-09	1.26347e-07
FBgn0034162	CG6426	-	-0.339229	0.00465128	0.0168612
FBgn0034172	CG6665	-	-0.454057	0.000262078	0.00131163
FBgn0034173	CG9010	-	0.740999	3.23537e-08	3.85826e-07
FBgn0034175	ste24b	ste24b prenyl protease type I	0.952407	2.20765e-09	3.40679e-08
FBgn0034179	CG6805	-	-0.374694	0.000756577	0.00341265
FBgn0034180	Ehbp1	Eps15 homology domain containing protein-binding protein 1	-0.384791	0.00170038	0.00700785
FBgn0034196	CG15605	-	1.03898	1.56984e-07	1.61574e-06
FBgn0034199	Gbp	Growth-blocking peptide	-1.02244	1.75652e-12	5.78112e-11
FBgn0034202	CG17287	-	0.642523	0.00336418	0.0127342
FBgn0034205	CG10950	-	0.681215	2.52844e-06	1.98644e-05
FBgn0034221	CG10764	-	-1.02375	1.17131e-16	7.66683e-15
FBgn0034224	insb	insensible	0.550655	0.012792	0.0402594
FBgn0034225	veil	veil	-0.570314	5.53071e-05	0.000324626
FBgn0034261	HPS4	Hermansky-Pudlak Syndrome 4 ortholog (H. sapiens)	-0.321885	0.00412073	0.0151501
FBgn0034263	CG10934	-	0.695642	3.18468e-08	3.80731e-07
FBgn0034271	CG4996	-	-0.285531	0.0116755	0.0373302
FBgn0034275	CG5002	-	0.483638	5.53429e-05	0.000324673
FBgn0034278	CG14488	-	0.644782	4.66618e-06	3.45179e-05
FBgn0034279	CG18635	-	1.73344	4.24898e-21	4.54173e-19
FBgn0034288	CG5084	-	0.632664	3.60303e-06	2.72945e-05
FBgn0034289	CG10910	-	1.32082	2.36471e-20	2.31523e-18
FBgn0034292	CG5767	-	1.19012	1.59307e-19	1.45007e-17
FBgn0034294	Muc55B	Mucin 55B	2.62984	6.93445e-16	4.05996e-14
FBgn0034295	CG10911	-	1.48531	1.83671e-17	1.3544e-15
FBgn0034301	CG5756	-	-1.27434	2.2636e-14	1.0262e-12
FBgn0034313	CG5726	-	-0.265143	0.0165142	0.0499628
FBgn0034317	CG14499	-	3.81487	8.83423e-08	9.55688e-07
FBgn0034318	CG14500	-	0.815397	4.52638e-06	3.36332e-05
FBgn0034327	CG14505	-	0.937775	0.000123661	0.000662425
FBgn0034354	GstE11	Glutathione S transferase E11	-0.399367	0.000929764	0.00410173
FBgn0034356	CG10924	-	-0.467679	0.00066597	0.00305481
FBgn0034363	CG5327	-	1.01765	5.6009e-11	1.31036e-09
FBgn0034364	CG5493	-	-1.10931	2.28656e-24	3.02735e-22
FBgn0034366	Atg7	Autophagy-related 7	-0.984975	1.38202e-14	6.38966e-13
FBgn0034383	CG17821	-	0.528325	0.00654127	0.0226822
FBgn0034389	Mctp	Multiple C2 domain and transmembrane region protein	0.409471	0.00875928	0.029067
FBgn0034390	CG15093	-	0.541279	0.000577379	0.00269297
FBgn0034394	CG15096	-	0.693114	0.00785983	0.0264821
FBgn0034396	CG15097	-	-0.440933	0.00080883	0.00361892
FBgn0034399	CG15083	-	-0.285457	0.0146181	0.044977
FBgn0034406	Jheh3	Juvenile hormone epoxide hydrolase 3	0.715345	1.30642e-05	8.82383e-05
FBgn0034416	CG15109	-	0.667218	7.40169e-07	6.58298e-06
FBgn0034417	CG15117	-	0.716368	2.68375e-05	0.000170307
FBgn0034428	CG18606	-	-2.59846	3.36092e-13	1.25106e-11
FBgn0034436	CG11961	-	0.808791	1.87018e-07	1.89474e-06
FBgn0034437	CG10051	-	0.930346	0.000116964	0.00063061
FBgn0034438	CG9416	-	-0.393314	0.00191475	0.00779071
FBgn0034443	cer	crammer	-1.13887	1.66671e-11	4.43353e-10
FBgn0034459	CG16716	-	0.90205	1.21546e-12	4.06933e-11
FBgn0034461	CG15124	-	0.765354	4.47296e-08	5.12938e-07
FBgn0034462	CG15905	-	-0.569279	0.00764283	0.0258781
FBgn0034463	CG15125	-	0.745598	2.14006e-06	1.71484e-05
FBgn0034464	CG11018	-	0.615168	9.48334e-06	6.56509e-05
FBgn0034467	CG15128	-	0.609789	6.71589e-07	6.03291e-06
FBgn0034470	Obp56d	Odorant-binding protein 56d	-0.921988	1.58812e-08	2.0582e-07
FBgn0034472	CG8517	-	0.766249	1.57847e-09	2.51929e-08
FBgn0034477	CG13872	-	1.18605	3.37201e-17	2.4402e-15
FBgn0034479	CG8654	-	0.827888	1.28278e-09	2.11097e-08
FBgn0034483	CG16894	-	0.530438	5.46897e-05	0.000321813
FBgn0034487	Efhc1.2	EFHC1 homologue 2	1.50574	1.40447e-06	1.17892e-05
FBgn0034490	CG9864	-	-0.660149	0.000326033	0.00160077
FBgn0034493	CG8908	-	0.676905	5.66248e-05	0.000331359
FBgn0034494	CG10444	-	-0.986852	4.80322e-15	2.44377e-13
FBgn0034499	Cpr56F	Cuticular protein 56F	-0.524657	3.95055e-06	2.9638e-05
FBgn0034501	CG13868	-	-0.480708	7.16916e-05	0.000407254
FBgn0034505	CG16739	-	0.760446	3.50124e-08	4.14984e-07
FBgn0034506	CG13870	-	0.696072	4.10389e-07	3.86848e-06
FBgn0034512	CG18067	-	-0.609715	4.06854e-05	0.000248181
FBgn0034513	CG13423	-	-0.490553	0.00266677	0.010395
FBgn0034532	CG13436	-	0.702751	1.1672e-06	9.9594e-06
FBgn0034535	CG11110	-	0.418685	0.00181678	0.00744016
FBgn0034542	Fem-1	Fem-1	-0.617042	1.8609e-06	1.51512e-05
FBgn0034543	CG30152	-	-0.377091	0.00138758	0.0058469
FBgn0034546	CG13442	-	0.80298	9.08922e-10	1.55962e-08
FBgn0034554	CG15227	-	-0.358441	0.00719791	0.0246136
FBgn0034560	CG9235	-	0.720727	4.5627e-07	4.26646e-06
FBgn0034566	CG9313	-	0.42669	0.00018298	0.000948775
FBgn0034569	dgt3	dim gamma-tubulin 3	-0.346065	0.0159212	0.0484201
FBgn0034582	Cht9	Cht9	-1.65161	6.12291e-09	8.59494e-08
FBgn0034583	CG10527	-	-0.488726	0.000279032	0.00138695
FBgn0034588	CG9394	-	-0.530585	4.25037e-05	0.000257927
FBgn0034592	CG9406	-	1.08679	3.45458e-09	5.1273e-08
FBgn0034595	CG15657	-	0.582365	4.31928e-05	0.000261423
FBgn0034601	CG4286	-	0.834913	4.7983e-07	4.4426e-06
FBgn0034606	ASPP	Ankyrin-repeat, SH3-domain, and Proline-rich-region containing Protein	-0.312388	0.00816189	0.0273181
FBgn0034628	Acox57D-p	acyl-Coenzyme A oxidase at 57D proximal	0.768439	1.23508e-07	1.29173e-06
FBgn0034629	Acox57D-d	acyl-Coenzyme A oxidase at 57D distal	1.84203	6.16762e-10	1.12455e-08
FBgn0034642	CG15674	-	0.85199	1.65864e-06	1.3725e-05
FBgn0034651	CG15676	-	0.913668	2.25351e-06	1.79097e-05
FBgn0034655	CG10307	-	0.973895	1.41888e-11	3.8445e-10
FBgn0034658	Grx-1	Grx-1	0.677849	1.12734e-05	7.73777e-05
FBgn0034661	CG4386	-	-0.567721	0.000977466	0.00429106
FBgn0034662	CG13492	-	1.0395	2.60556e-11	6.65732e-10
FBgn0034664	CG4377	-	0.983671	5.73235e-11	1.33575e-09
FBgn0034671	CG13494	-	0.786396	6.96401e-06	4.99002e-05
FBgn0034674	CG9304	-	-0.455603	0.000612433	0.00284055
FBgn0034681	CG9308	-	0.727998	0.000135573	0.000721589
FBgn0034684	CG13501	-	0.766766	3.05647e-07	2.94038e-06
FBgn0034687	CG11475	-	0.618945	0.000191296	0.000987939
FBgn0034688	CG11474	-	-0.47862	1.49363e-05	9.9328e-05
FBgn0034689	CG2921	-	0.269392	0.012582	0.0397054
FBgn0034705	CG11170	-	-0.727969	3.25464e-08	3.87728e-07
FBgn0034706	CG11275	-	-0.399802	0.00295427	0.011356
FBgn0034707	MED16	Mediator complex subunit 16	-0.499115	0.000963179	0.00423631
FBgn0034709	Swim	Secreted Wg-interacting molecule	-0.380853	0.003003	0.0115168
FBgn0034712	CG3264	-	0.993223	2.18909e-10	4.41265e-09
FBgn0034713	CG11291	-	0.475523	0.000555605	0.00260183
FBgn0034717	CG5819	-	0.472803	1.6309e-05	0.000107293
FBgn0034718	wdp	windpipe	0.374478	0.000827326	0.00369317
FBgn0034720	Liprin-gamma	Liprin-gamma	0.344627	0.00571874	0.0202151
FBgn0034721	CG11298	-	1.11985	5.09061e-07	4.6923e-06
FBgn0034723	CG13506	-	0.302838	0.00735731	0.0250643
FBgn0034729	CG10344	-	0.801141	1.60973e-07	1.65096e-06
FBgn0034733	CG4752	-	0.736718	2.08206e-07	2.08403e-06
FBgn0034737	CG11362	-	0.486223	0.00114749	0.00493702
FBgn0034739	CG3927	-	-0.437864	0.000600347	0.00278782
FBgn0034740	nsr	novel spermatogenesis regulator	-0.378048	0.00505057	0.0181003
FBgn0034741	CG4269	-	-0.695558	9.30215e-07	8.10616e-06
FBgn0034745	CG4329	-	0.859494	2.75339e-09	4.17161e-08
FBgn0034753	CG2852	-	-0.449069	0.0038099	0.0141801
FBgn0034756	Cyp6d2	Cyp6d2	-0.587432	5.96087e-07	5.4131e-06
FBgn0034761	CG4250	-	-0.659111	3.42192e-07	3.26259e-06
FBgn0034774	CG13526	-	0.912659	0.000330233	0.00161866
FBgn0034776	CG13527	-	1.22931	5.99555e-10	1.09661e-08
FBgn0034783	CG9825	-	0.928279	0.000630088	0.00290969
FBgn0034786	CG13531	-	-0.361865	0.00143191	0.00600843
FBgn0034800	CG3788	-	0.740166	1.68009e-07	1.71708e-06
FBgn0034804	CG3831	-	-0.593719	3.32427e-06	2.54642e-05
FBgn0034816	CG3085	-	0.744729	5.6328e-10	1.03514e-08
FBgn0034819	CG9877	-	-0.604958	4.85895e-05	0.000289574
FBgn0034820	CG13538	-	1.15804	3.62707e-12	1.10337e-10
FBgn0034822	RpL37b	Ribosomal protein L37b	-0.572505	0.00116276	0.0049935
FBgn0034824	Klp59C	Kinesin-like protein at 59C	0.646511	5.92276e-07	5.38269e-06
FBgn0034825	CG3215	-	0.817703	3.71341e-08	4.35261e-07
FBgn0034826	CG13544	-	0.824488	7.9879e-10	1.3974e-08
FBgn0034827	Klp59D	Kinesin-like protein at 59D	0.609326	1.24609e-06	1.0574e-05
FBgn0034829	CG9899	-	-0.455233	0.0014873	0.00621319
FBgn0034833	CG13539	-	0.854213	2.83549e-07	2.7416e-06
FBgn0034834	LS2	Large Subunit 2	-0.408996	0.0123608	0.0391451
FBgn0034835	CG3092	-	1.0287	1.08842e-13	4.44955e-12
FBgn0034837	RpL22-like	Ribosomal protein L22-like	-0.51792	2.92897e-05	0.000183865
FBgn0034840	CG3124	-	0.82348	1.54857e-10	3.25674e-09
FBgn0034841	CG13541	-	0.59138	0.000164317	0.000858885
FBgn0034842	Prosbeta5R1	Proteasome beta5 subunit-related 1	0.833639	1.88447e-07	1.90589e-06
FBgn0034844	CG9861	-	0.761042	3.89911e-10	7.41086e-09
FBgn0034846	CG9863	-	1.07886	1.41946e-10	3.02343e-09
FBgn0034850	CG9875	-	0.551159	0.00120232	0.00513497
FBgn0034856	yellow-d2	yellow-d2	0.440706	0.016469	0.0498521
FBgn0034860	CG9812	-	0.622208	0.00894177	0.0295716
FBgn0034863	SkpF	SKP1-related F	0.608147	0.000663175	0.00304439
FBgn0034882	CG5398	-	0.708934	5.30849e-06	3.89234e-05
FBgn0034884	CG17662	-	-0.713299	0.00583238	0.0205483
FBgn0034885	CG4019	-	-0.523479	0.000365883	0.00177325
FBgn0034897	Sesn	Sestrin	-0.685634	6.23754e-08	7.00806e-07
FBgn0034898	CG18128	-	0.813011	7.56332e-06	5.35686e-05
FBgn0034902	CG5532	-	-0.329798	0.00177297	0.00728379
FBgn0034903	CG9850	-	-1.26128	6.38862e-10	1.15194e-08
FBgn0034904	CG15800	-	0.625067	0.000111325	0.000604121
FBgn0034907	CG5539	-	0.554655	2.04182e-05	0.000131578
FBgn0034913	Snap29	Synaptosomal-associated protein 29kDa	-0.449624	3.51422e-05	0.000217788
FBgn0034914	CG5554	-	-0.503565	0.000368907	0.00178643
FBgn0034937	fzr2	fizzy-related 2	0.683622	7.20731e-08	7.95947e-07
FBgn0034951	CG3860	-	0.330224	0.00198403	0.008026
FBgn0034957	CG3121	-	0.635517	4.62492e-07	4.3108e-06
FBgn0034958	CG3907	-	-0.340424	0.00169604	0.00699242
FBgn0034965	ppk29	pickpocket 29	-0.763945	0.00219654	0.00875834
FBgn0034973	CG13564	-	1.09834	1.4903e-06	1.24114e-05
FBgn0034974	CG16786	-	-0.674718	9.67595e-08	1.03903e-06
FBgn0034976	CG4049	-	-0.269117	0.0158322	0.0482126
FBgn0034997	CG3376	-	-0.555734	2.17085e-05	0.000139507
FBgn0034998	CG13577	-	0.362557	0.00497524	0.0178688
FBgn0034999	CG3394	-	-1.27339	1.28017e-14	5.97862e-13
FBgn0035003	CG15873	-	0.588593	0.000139179	0.000738423
FBgn0035004	Pgam5-2	Phosphoglycerate mutase 5-2	0.885214	6.98603e-05	0.000397627
FBgn0035005	CG3483	-	0.921813	2.10136e-10	4.27277e-09
FBgn0035007	CG3492	-	0.862996	1.77487e-12	5.82506e-11
FBgn0035008	CG3494	-	0.968959	1.13546e-11	3.15734e-10
FBgn0035009	CG16837	-	0.426064	0.00367723	0.0137319
FBgn0035014	CG13581	-	1.34997	2.48595e-14	1.10972e-12
FBgn0035020	CG13585	-	-0.320351	0.00208163	0.00835735
FBgn0035023	ITP	Ion transport peptide	-0.300997	0.015927	0.0484252
FBgn0035028	Start1	Start1	-0.265648	0.0146192	0.044977
FBgn0035034	CG3565	-	0.960627	4.70697e-09	6.80409e-08
FBgn0035041	CG13594	-	0.436966	0.0163927	0.0497101
FBgn0035043	CG4781	-	0.510761	1.2648e-05	8.58752e-05
FBgn0035047	Pof	Painting of fourth	0.724527	2.68261e-08	3.27622e-07
FBgn0035056	spz6	spatzle 6	-0.724514	3.26109e-06	2.50461e-05
FBgn0035065	CG3589	-	-0.281356	0.00866728	0.0288016
FBgn0035069	CG3611	-	0.800277	1.52864e-06	1.27215e-05
FBgn0035078	Tpc2	Thiamine pyrophosphate carrier protein 2	0.558386	6.56591e-05	0.000376659
FBgn0035089	Phk-3	Pherokine 3	-1.08842	5.12713e-14	2.20429e-12
FBgn0035091	CG3829	-	-0.874137	4.91256e-11	1.18502e-09
FBgn0035094	CG9380	-	1.26784	3.427e-22	3.9145e-20
FBgn0035097	CG13405	-	0.690716	2.56673e-05	0.000163237
FBgn0035103	Vdup1	Vitamin D[[3]] up-regulated protein 1	-0.298923	0.00637218	0.0221751
FBgn0035107	mri	mrityu	-0.473487	1.37608e-05	9.23014e-05
FBgn0035124	ttm2	tiny tim 2	0.684331	4.37387e-08	5.0306e-07
FBgn0035138	CG13884	-	0.760275	2.10312e-06	1.69106e-05
FBgn0035139	CG13891	-	1.20578	1.01544e-08	1.36616e-07
FBgn0035140	CG17180	-	-0.350255	0.00645917	0.0224376
FBgn0035143	Ppm1	Ppm1	0.510438	1.8592e-05	0.00012061
FBgn0035146	CG13893	-	-0.585819	5.29615e-05	0.000312433
FBgn0035147	Gale	UDP-galactose 4'-epimerase	0.334653	0.00746619	0.0253537
FBgn0035154	CG3344	-	0.768284	6.06648e-09	8.526e-08
FBgn0035160	hng3	hinge3	-0.455377	0.000163746	0.000856668
FBgn0035161	CG13898	-	1.01875	3.79409e-13	1.40333e-11
FBgn0035186	CG13912	-	0.84869	3.84545e-07	3.64551e-06
FBgn0035189	CG9119	-	-1.59547	2.84799e-22	3.28534e-20
FBgn0035192	CG9194	-	0.71615	0.0028775	0.0111013
FBgn0035193	CG9192	-	-0.381951	0.0164159	0.0497299
FBgn0035196	CG9129	-	0.864128	2.34935e-11	6.05582e-10
FBgn0035204	CG2277	-	-0.389892	0.0017087	0.00703963
FBgn0035208	CG9184	-	-0.719578	0.00159956	0.0066322
FBgn0035211	CG2211	-	-0.354846	0.00214606	0.00858646
FBgn0035217	FucTD	FucTD	0.970402	1.14474e-11	3.17556e-10
FBgn0035218	CG9173	-	0.88089	4.75481e-10	8.89219e-09
FBgn0035231	Cct2	CTP:phosphocholine cytidylyltransferase 2	0.751791	1.43472e-09	2.32165e-08
FBgn0035237	CG13917	-	-0.351493	0.0158952	0.0483538
FBgn0035262	CG18171	-	0.718926	1.54987e-08	2.01535e-07
FBgn0035263	CG12035	-	0.757265	4.30502e-07	4.04172e-06
FBgn0035265	CG18173	-	0.998276	1.37168e-06	1.15556e-05
FBgn0035266	Gk	Glycerol kinase	0.340817	0.012052	0.0383133
FBgn0035268	CG8001	-	0.329374	0.00739097	0.0251539
FBgn0035270	CG13933	-	-0.312324	0.00464631	0.0168485
FBgn0035273	CG12020	-	1.03363	2.21472e-10	4.45659e-09
FBgn0035282	CNMa	CNMamide	1.06328	0.00174069	0.0071613
FBgn0035283	CG12024	-	-0.444415	5.52579e-05	0.000324501
FBgn0035300	CG1139	-	-1.21987	9.57459e-14	3.94182e-12
FBgn0035308	CG15822	-	-0.459642	0.000143364	0.000758208
FBgn0035309	CG15879	-	0.950412	4.12955e-05	0.000251771
FBgn0035316	CG15878	-	0.62066	4.61402e-06	3.42189e-05
FBgn0035325	CG13806	-	1.14897	5.06778e-15	2.55579e-13
FBgn0035334	CG8993	-	-0.33051	0.00473187	0.0171055
FBgn0035348	CG16758	-	-1.19145	2.83567e-16	1.74806e-14
FBgn0035360	CG1246	-	0.656534	2.03991e-08	2.56386e-07
FBgn0035380	CG9970	-	0.851547	1.68186e-10	3.49293e-09
FBgn0035384	CG2113	-	0.423258	0.00214784	0.00859063
FBgn0035410	CG14964	-	0.831035	0.000148993	0.000785127
FBgn0035412	CG14957	-	-0.435177	0.00324171	0.0123027
FBgn0035425	CG17746	-	-0.338929	0.00342352	0.0129253
FBgn0035426	CG12078	-	0.666437	3.66675e-06	2.76871e-05
FBgn0035430	CG12009	-	-0.794887	2.57162e-07	2.51781e-06
FBgn0035438	PHGPx	PHGPx	-0.542793	4.92727e-05	0.000292896
FBgn0035452	CG10359	-	-0.334197	0.00194188	0.00787773
FBgn0035455	CG10862	-	0.449175	0.000273729	0.00136466
FBgn0035461	ntc	nutcracker	0.465157	0.000225801	0.00114483
FBgn0035477	CG14982	-	0.558253	0.00214493	0.00858487
FBgn0035481	CG12605	-	0.532978	3.19895e-06	2.46338e-05
FBgn0035483	Mul1	Mitochondrial E3 ubiquitin protein ligase 1 homologue	0.340947	0.00537179	0.019125
FBgn0035484	CG11594	-	0.56088	0.000204053	0.00104456
FBgn0035491	Dpy-30L2	Dpy-30-like 2	0.878424	7.53456e-12	2.16754e-10
FBgn0035495	CG14989	-	0.42357	0.00021626	0.00110125
FBgn0035496	CG14990	-	-0.525326	5.97531e-05	0.000347744
FBgn0035497	CG14995	-	0.707296	5.54198e-07	5.06031e-06
FBgn0035501	CG1299	-	-0.53498	1.41588e-05	9.4698e-05
FBgn0035510	Cpr64Aa	Cuticular protein 64Aa	0.755211	0.000139527	0.000739933
FBgn0035515	CG14997	-	-0.290276	0.00563704	0.0199627
FBgn0035522	CG1273	-	-0.604372	1.64999e-05	0.000108304
FBgn0035528	CG15012	-	-0.352475	0.00211928	0.00849241
FBgn0035529	CG1319	-	-0.494831	5.56581e-05	0.000326082
FBgn0035532	CG15014	-	-0.309647	0.0119387	0.0380569
FBgn0035538	DopEcR	Dopamine/Ecdysteroid receptor	0.761759	1.92009e-07	1.94024e-06
FBgn0035540	Syx17	Syntaxin 17	-0.322343	0.00318709	0.012127
FBgn0035542	DOR	-	-0.452586	0.0024554	0.00964851
FBgn0035544	CG15021	-	-0.478055	0.0111824	0.0359486
FBgn0035546	CG11345	-	-1.26017	1.09598e-14	5.16976e-13
FBgn0035553	CG13722	-	-0.73133	5.89066e-05	0.000343092
FBgn0035558	CG11357	-	-0.277721	0.0158623	0.048276
FBgn0035567	CG7514	-	1.20089	3.55456e-12	1.08414e-10
FBgn0035568	CG18418	-	0.886311	2.97228e-12	9.23466e-11
FBgn0035569	CG15876	-	0.462531	0.00530743	0.0189277
FBgn0035571	CG12493	-	-0.608978	2.7391e-06	2.13911e-05
FBgn0035574	RhoGEF64C	Rho guanine nucleotide exchange factor at 64C	-0.628298	2.02579e-07	2.03295e-06
FBgn0035577	CG13708	-	-0.940132	0.00289171	0.0111487
FBgn0035578	CG13707	-	-0.783155	1.79795e-07	1.82706e-06
FBgn0035581	CG17150	-	0.881633	2.19172e-11	5.68725e-10
FBgn0035583	CG13704	-	0.710796	2.8403e-10	5.58992e-09
FBgn0035584	CG17030	-	0.630039	1.56929e-05	0.000103885
FBgn0035585	ATPsynCF6L	ATP synthase, coupling factor 6-like	0.645881	7.59259e-06	5.37432e-05
FBgn0035587	Gdap1	GDAP1 ortholog	0.667801	0.0151539	0.0464509
FBgn0035598	CG4669	-	0.81389	9.42634e-11	2.10395e-09
FBgn0035607	CG4835	-	1.79825	7.16605e-17	4.91127e-15
FBgn0035608	blanks	blanks	-0.953561	1.34304e-14	6.23416e-13
FBgn0035612	CG10625	-	-0.469348	0.00657555	0.0227808
FBgn0035619	CG10592	-	2.59455	2.19106e-34	4.32678e-32
FBgn0035620	CG5150	-	3.0976	6.91029e-38	1.91695e-35
FBgn0035623	mthl2	methuselah-like 2	-1.1024	1.75222e-16	1.12171e-14
FBgn0035624	Eaf6	Eaf6	-0.377458	0.00728793	0.0248597
FBgn0035625	Blimp-1	Blimp-1	-0.825449	4.88023e-09	7.04579e-08
FBgn0035638	Tektin-C	Tektin C	0.662079	2.55651e-07	2.50723e-06
FBgn0035644	DNApol-epsilon58	DNA polymerase epsilon 58kD subunit	0.45751	0.00703106	0.024172
FBgn0035657	alphaKap4	alpha Karyopherin-4	1.08388	1.23169e-10	2.66241e-09
FBgn0035661	CG10477	-	-1.05859	2.1902e-07	2.17787e-06
FBgn0035665	Jon65Aiii	Jonah 65Aiii	1.14627	5.38954e-09	7.66329e-08
FBgn0035666	Jon65Aii	Jonah 65Aii	-1.05026	7.83159e-17	5.33601e-15
FBgn0035667	Jon65Ai	Jonah 65Ai	-0.369478	0.0153094	0.0468776
FBgn0035670	CG10472	-	4.14867	5.94785e-184	3.46492e-180
FBgn0035678	CG10469	-	-0.652727	6.87751e-05	0.000392793
FBgn0035679	CG10467	-	-1.09954	1.21365e-22	1.42831e-20
FBgn0035696	Best2	Bestrophin 2	-0.38508	0.0021365	0.00855408
FBgn0035703	CG8270	-	-0.381884	0.00157611	0.00654661
FBgn0035707	CG8368	-	0.428768	0.000223493	0.0011346
FBgn0035709	eIF4E-4	eIF4E-4	0.901155	6.99446e-13	2.45459e-11
FBgn0035710	SP1173	SP1173	0.604571	2.83984e-05	0.000179139
FBgn0035718	CG14820	-	6.38801	3.29471e-38	9.59667e-36
FBgn0035724	CG10064	-	0.844568	1.45127e-09	2.34352e-08
FBgn0035730	CG17744	-	0.611478	3.4624e-06	2.63319e-05
FBgn0035737	Cpr65Ec	Cuticular protein 65Ec	-0.672301	0.00178833	0.00733398
FBgn0035741	BBS1	Bardet-Biedl syndrome 1 ortholog (H. sapiens)	0.785911	0.011718	0.0374559
FBgn0035742	CG8629	-	2.80672	8.66919e-23	1.03066e-20
FBgn0035743	CG15829	-	3.40344	1.06395e-52	6.19802e-50
FBgn0035750	CG14826	-	0.749526	0.0118791	0.0378876
FBgn0035763	CG8602	-	-0.427425	0.000522063	0.00245462
FBgn0035767	CG8596	-	-0.618659	1.60585e-07	1.6499e-06
FBgn0035768	CG14834	-	0.902499	1.85701e-06	1.51301e-05
FBgn0035770	pst	pastrel	0.500587	0.000824732	0.00368442
FBgn0035772	Sh3beta	Sh3beta	-0.44929	0.00431003	0.0157665
FBgn0035776	CG8564	-	0.819116	1.65459e-11	4.43164e-10
FBgn0035777	CG8563	-	0.769103	0.00896178	0.0296293
FBgn0035779	CG8562	-	0.725117	0.00726354	0.0247884
FBgn0035780	CG18417	-	0.943639	1.48963e-10	3.1671e-09
FBgn0035781	CG8560	-	0.770612	5.01211e-06	3.68662e-05
FBgn0035782	CG14835	-	0.867668	3.53371e-09	5.23807e-08
FBgn0035799	CG14838	-	0.396768	0.00745014	0.0253213
FBgn0035800	CG7716	-	0.732258	2.35568e-10	4.70773e-09
FBgn0035811	CG12262	-	-0.366093	0.0134609	0.0421029
FBgn0035815	Snmp2	Sensory neuron membrane protein 2	-0.772177	9.04404e-05	0.00050249
FBgn0035823	eIF4E-5	eIF4E-5	0.470952	4.81634e-05	0.000287623
FBgn0035830	CG8209	-	-0.272907	0.0109198	0.0352721
FBgn0035833	CG7565	-	0.279727	0.015154	0.0464509
FBgn0035839	CG7550	-	-0.446619	0.000804776	0.00360494
FBgn0035845	CG13675	-	-2.56239	3.67583e-11	9.03526e-10
FBgn0035850	Atg18a	Autophagy-related 18a	-0.425042	0.000130042	0.000695007
FBgn0035852	CG7387	-	0.709638	2.00123e-08	2.52341e-07
FBgn0035855	CG7366	-	0.801947	4.6057e-09	6.68257e-08
FBgn0035856	CG13679	-	1.54977	2.30816e-06	1.83066e-05
FBgn0035857	CG8006	-	0.637536	5.72019e-05	0.000333865
FBgn0035861	CG7213	-	-0.680452	0.00035584	0.00173251
FBgn0035875	Cpr66Cb	Cuticular protein 66Cb	-2.05795	2.1224e-16	1.33665e-14
FBgn0035877	CG7083	-	-0.435469	6.17686e-05	0.000357865
FBgn0035879	GAPcenA	GTPase activating protein and centrosome-associated ortholog (H. sapiens)	-0.340277	0.00181043	0.00741676
FBgn0035886	Jon66Ci	Jonah 66Ci	0.874399	9.36748e-06	6.5042e-05
FBgn0035887	Jon66Cii	Jonah 66Cii	0.675285	1.08209e-06	9.3319e-06
FBgn0035888	CG7120	-	-0.368124	0.00589945	0.0207532
FBgn0035902	CG6683	-	-0.507976	0.00333861	0.0126457
FBgn0035904	GstO3	Glutathione S transferase O3	-0.47438	6.53331e-05	0.000375451
FBgn0035915	S-Lap1	Sperm-Leucylaminopeptidase 1	0.759077	6.41832e-07	5.77451e-06
FBgn0035916	GAPsec	GTPase activating protein, SECIS-dependent read-through	-0.367845	0.00248774	0.00975586
FBgn0035917	Zasp66	Z band alternatively spliced PDZ-motif protein 66	-0.410419	0.0150554	0.0462095
FBgn0035924	CG6576	-	0.920877	1.37799e-09	2.24231e-08
FBgn0035926	CG5804	-	1.56994	1.16214e-08	1.54215e-07
FBgn0035934	TrpA1	Transient receptor potential cation channel A1 ortholog	0.948857	3.91982e-05	0.000240368
FBgn0035943	CG5653	-	0.987359	2.39269e-11	6.14036e-10
FBgn0035945	CG5026	-	-0.329347	0.00201153	0.00811228
FBgn0035952	CG5280	-	0.838929	2.56248e-09	3.91999e-08
FBgn0035957	CG5144	-	0.639071	4.15042e-07	3.90602e-06
FBgn0035959	CG4911	-	-0.732749	4.40743e-08	5.0642e-07
FBgn0035964	Dhpr	Dihydropteridine reductase	-0.815961	6.90529e-08	7.66446e-07
FBgn0035968	Slc45-1	Slc45 ortholog 1	-0.54869	4.88789e-05	0.000291001
FBgn0035971	CG4477	-	1.11706	2.98724e-09	4.48525e-08
FBgn0035975	PGRP-LA	Peptidoglycan recognition protein LA	-0.285759	0.0095967	0.0314695
FBgn0035981	CG4452	-	-0.390499	0.000842884	0.00375399
FBgn0035983	CG4080	-	-0.384783	0.00453096	0.0164815
FBgn0035988	CG3982	-	0.850018	5.43123e-11	1.27837e-09
FBgn0035995	CG3529	-	-0.387264	0.00164472	0.00680733
FBgn0035999	CG3552	-	0.78401	4.19053e-08	4.83883e-07
FBgn0036014	CG3222	-	0.87875	3.00785e-11	7.53643e-10
FBgn0036016	CG3306	-	0.877423	1.2948e-09	2.12774e-08
FBgn0036022	CG8329	-	1.14618	0.0165311	0.0499828
FBgn0036023	CG18179	-	1.50367	0.00158504	0.00657902
FBgn0036024	CG18180	-	0.652306	0.000278359	0.00138478
FBgn0036029	CG16719	-	0.72826	1.6004e-08	2.06951e-07
FBgn0036030	CG6767	-	-0.787942	1.25169e-08	1.65158e-07
FBgn0036031	CG6761	-	0.78885	2.59662e-08	3.18121e-07
FBgn0036046	Ilp2	Insulin-like peptide 2	-0.6011	0.00481518	0.0173636
FBgn0036058	CG6707	-	-0.304242	0.0126171	0.0397684
FBgn0036070	CG8072	-	-0.465524	0.00336628	0.0127381
FBgn0036075	CG8065	-	0.556508	0.000137619	0.000731477
FBgn0036082	CG12362	-	0.520259	1.23729e-05	8.41057e-05
FBgn0036085	CG6527	-	0.598017	2.80848e-06	2.18289e-05
FBgn0036089	CG14151	-	0.742428	2.94268e-06	2.28263e-05
FBgn0036093	CG14154	-	0.941705	2.19078e-11	5.68725e-10
FBgn0036099	CG11811	-	-0.295802	0.00765439	0.0259097
FBgn0036101	NijA	Ninjurin A	-0.306398	0.0121895	0.0386555
FBgn0036121	CG6310	-	-0.450648	0.00119151	0.00509629
FBgn0036125	CG6279	-	0.685263	3.08797e-08	3.70907e-07
FBgn0036126	CG6272	-	-0.484752	0.000504171	0.002383
FBgn0036141	wls	wntless	-0.260838	0.015587	0.0476144
FBgn0036142	CG7616	-	0.54009	4.60925e-05	0.000277102
FBgn0036144	GlcAT-P	GlcAT-P	-0.937762	5.08921e-15	2.55579e-13
FBgn0036147	Plod	procollagen lysyl hydroxylase	-0.343796	0.00233689	0.00924832
FBgn0036153	CG7573	-	0.586632	0.00295214	0.0113516
FBgn0036156	CG11726	-	0.75499	8.4321e-08	9.14734e-07
FBgn0036159	CG7557	-	0.708374	1.50633e-07	1.55725e-06
FBgn0036160	CG12289	-	1.08987	1.18356e-12	3.97395e-11
FBgn0036161	CG7551	-	1.08628	4.22899e-10	7.98573e-09
FBgn0036162	CG6140	-	0.680749	2.72375e-07	2.64453e-06
FBgn0036165	chrb	charybde	-0.491392	5.46178e-05	0.000321552
FBgn0036181	Muc68Ca	Mucin 68Ca	2.26182	2.12132e-10	4.29834e-09
FBgn0036183	CG6083	-	0.607302	1.87675e-05	0.000121613
FBgn0036204	Tim13	Tim13	0.897844	7.45645e-07	6.62158e-06
FBgn0036214	CG7264	-	0.545203	1.12769e-05	7.73777e-05
FBgn0036217	CG5906	-	0.455918	0.0040016	0.0147727
FBgn0036218	Sprn	Spermitin	0.779622	3.25594e-10	6.31198e-09
FBgn0036221	CG11588	-	0.793035	1.63872e-08	2.11203e-07
FBgn0036222	SdhAL	Succinate dehydrogenase, subunit A (flavoprotein)-like	1.07919	2.09114e-10	4.25941e-09
FBgn0036225	CG5883	-	0.768183	8.97776e-07	7.84107e-06
FBgn0036226	CG7252	-	1.37631	6.47192e-19	5.62719e-17
FBgn0036228	obst-G	obstructor-G	0.754317	0.000878937	0.00389966
FBgn0036229	CG7248	-	2.08107	3.50192e-37	9.27293e-35
FBgn0036236	CG6931	-	0.581754	0.000901067	0.00398268
FBgn0036240	CG6928	-	-0.293734	0.00955867	0.0313625
FBgn0036246	CG17154	-	0.568608	0.000430918	0.00206186
FBgn0036264	CG11529	-	-0.524693	0.00227708	0.00903959
FBgn0036271	Pbgs	Porphobilinogen synthase	-0.405081	0.00792	0.0266386
FBgn0036282	Smyd4	SET and MYND domain protein 4	0.780705	0.010445	0.0339551
FBgn0036287	CG10663	-	-0.472364	0.0104143	0.0338646
FBgn0036289	CG10657	-	-0.420895	0.00314062	0.0119933
FBgn0036310	CG10969	-	0.726192	4.48573e-07	4.19785e-06
FBgn0036311	CG17666	-	0.729571	2.11839e-08	2.65106e-07
FBgn0036320	CG10943	-	0.821844	2.7115e-09	4.11886e-08
FBgn0036321	CG14120	-	0.921426	4.0478e-08	4.69263e-07
FBgn0036323	CG14118	-	-1.02888	3.1861e-08	3.80731e-07
FBgn0036325	CG10752	-	0.977816	6.02899e-10	1.101e-08
FBgn0036327	CG10748	-	-0.376167	0.00435589	0.0159192
FBgn0036328	CG10749	-	0.772551	5.40159e-08	6.13391e-07
FBgn0036329	CG11262	-	0.667631	3.40545e-06	2.60176e-05
FBgn0036337	AdenoK	Adenosine Kinase	-0.335497	0.00565862	0.0200208
FBgn0036341	Syx13	Syntaxin 13	-0.622648	1.61995e-06	1.34335e-05
FBgn0036345	CG17300	-	0.58926	6.58958e-05	0.000377645
FBgn0036346	CG11251	-	0.870345	2.58534e-09	3.94781e-08
FBgn0036353	CG10171	-	0.32841	0.00383316	0.0142366
FBgn0036361	CG10154	-	2.03786	7.2942e-18	5.66565e-16
FBgn0036362	CG10725	-	0.969442	2.51658e-15	1.33885e-13
FBgn0036364	CG14109	-	-0.581214	7.11535e-06	5.08283e-05
FBgn0036367	CG10116	-	1.21435	5.5503e-17	3.8492e-15
FBgn0036369	CG10089	-	0.470054	0.000115254	0.000623122
FBgn0036373	Tgi	Tondu-domain-containing Growth Inhibitor	-0.349518	0.00187228	0.00764598
FBgn0036381	CG8745	-	-0.579893	0.000100299	0.000552599
FBgn0036391	CG17364	-	0.700205	0.010093	0.0329208
FBgn0036393	CG17362	-	1.36505	1.13905e-06	9.76531e-06
FBgn0036394	CG9040	-	1.46848	2.62826e-07	2.55822e-06
FBgn0036403	CG6661	-	0.792402	2.50705e-10	4.9931e-09
FBgn0036410	CG8100	-	-0.627909	1.32514e-06	1.11878e-05
FBgn0036419	CG13482	-	0.414577	0.000276537	0.00137689
FBgn0036421	CG13481	-	0.655726	8.63982e-07	7.57322e-06
FBgn0036426	CG9592	-	0.635295	0.00124418	0.00529628
FBgn0036436	CG4914	-	-0.563794	0.00107489	0.00466252
FBgn0036437	CG5048	-	0.645652	4.65675e-07	4.337e-06
FBgn0036438	CG13477	-	0.9189	7.81536e-10	1.36927e-08
FBgn0036440	CG17177	-	1.29743	9.93337e-11	2.18365e-09
FBgn0036441	CG13476	-	0.897675	3.4824e-10	6.69529e-09
FBgn0036442	CG13473	-	0.99687	4.83889e-07	4.47089e-06
FBgn0036443	CG13471	-	0.653635	1.34604e-06	1.13561e-05
FBgn0036448	mop	myopic	-0.415896	0.00195142	0.00790817
FBgn0036449	bmm	brummer	0.567648	0.000101244	0.0005572
FBgn0036463	Reck	Reversion-inducing-cysteine-rich protein with kazal motifs	-0.335306	0.0150859	0.0462786
FBgn0036467	CG12310	-	-0.81436	2.3486e-08	2.89868e-07
FBgn0036468	CG13461	-	1.3942	6.93041e-09	9.57844e-08
FBgn0036469	CG18649	-	1.74409	8.06441e-22	9.12218e-20
FBgn0036471	CG13460	-	0.93702	7.71926e-08	8.46069e-07
FBgn0036481	CG16959	-	-0.496158	0.00780089	0.0263139
FBgn0036482	CG13457	-	0.807775	1.28591e-08	1.69099e-07
FBgn0036490	CG6888	-	0.699162	5.79537e-07	5.27514e-06
FBgn0036496	CG7804	-	-0.508042	0.000130173	0.000695389
FBgn0036497	Ran-like	Ran-like	1.00223	1.02679e-12	3.47764e-11
FBgn0036498	CG13455	-	0.561695	2.67691e-06	2.09742e-05
FBgn0036499	CG7276	-	0.692289	0.000109172	0.000594656
FBgn0036501	CG7272	-	-0.589446	7.20505e-08	7.95947e-07
FBgn0036509	CG7739	-	-0.300918	0.00534146	0.0190258
FBgn0036512	CG16979	-	0.266505	0.0113462	0.0363971
FBgn0036519	CG7650	-	-0.328924	0.0113609	0.0364344
FBgn0036520	CG13449	-	0.511301	0.000563695	0.00263442
FBgn0036529	pgant8	polypeptide GalNAc transferase 8	-0.545255	2.26015e-05	0.000144687
FBgn0036531	CG6244	-	-1.03155	0.000658877	0.00302766
FBgn0036549	CG10516	-	-1.07522	4.30885e-06	3.21604e-05
FBgn0036550	CG17026	-	-0.565905	3.46065e-06	2.63319e-05
FBgn0036553	CG17027	-	-0.524881	3.31471e-05	0.000205972
FBgn0036563	CG13075	-	0.949949	4.69335e-17	3.33428e-15
FBgn0036568	ATPsynbetaL	ATP synthase, beta subunit-like	-0.52018	7.50402e-05	0.000424208
FBgn0036579	CG5027	-	-0.316808	0.00983398	0.0321661
FBgn0036587	CG4950	-	-0.777986	9.51121e-10	1.6201e-08
FBgn0036600	CG13043	-	-0.490434	0.0137714	0.0428211
FBgn0036601	CG13063	-	-1.31106	1.59542e-08	2.06536e-07
FBgn0036605	CG13041	-	-0.727036	1.27302e-05	8.62825e-05
FBgn0036606	CG13060	-	-0.699603	0.000441008	0.00210581
FBgn0036609	CG13039	-	0.965601	0.0008487	0.00377701
FBgn0036620	CG4842	-	-1.33865	2.63366e-10	5.2274e-09
FBgn0036622	CG4753	-	3.48423	4.57726e-36	1.02557e-33
FBgn0036638	CG13033	-	-1.81839	5.06373e-08	5.78125e-07
FBgn0036652	CG13032	-	0.553653	4.7987e-05	0.000286716
FBgn0036663	CG9674	-	0.516618	0.00079361	0.0035632
FBgn0036670	CG13029	-	0.838884	1.68209e-06	1.38994e-05
FBgn0036676	CG13028	-	-0.771541	0.000498874	0.00235892
FBgn0036677	CG13023	-	-0.943874	0.000123617	0.000662425
FBgn0036678	CG11905	-	-0.469986	0.000838693	0.00373818
FBgn0036685	CG6664	-	-0.31273	0.0119427	0.0380591
FBgn0036687	CG6652	-	0.630559	3.5666e-08	4.21018e-07
FBgn0036703	CG7707	-	0.614193	1.22175e-05	8.31948e-05
FBgn0036704	CG6497	-	1.22804	1.55562e-13	6.22837e-12
FBgn0036705	CG13723	-	0.63256	0.0092301	0.0303699
FBgn0036706	ND-24L	NADH dehydrogenase (ubiquinone) 24 kDa subunit-like	0.676425	2.22879e-05	0.000142836
FBgn0036708	CG13725	-	1.06251	1.27785e-10	2.74691e-09
FBgn0036723	CG12229	-	0.846213	1.48462e-11	4.01329e-10
FBgn0036727	CG7589	-	0.436192	0.00204839	0.00824093
FBgn0036729	CG13733	-	0.636377	2.47204e-06	1.94343e-05
FBgn0036730	qjt	quijote	-0.499008	0.01453	0.0447735
FBgn0036731	CG6333	-	0.828068	1.37495e-06	1.15748e-05
FBgn0036740	Vps60	Vacuolar protein sorting 60	-0.453699	8.05596e-05	0.000452992
FBgn0036741	CG7510	-	-0.531096	0.000175271	0.000912051
FBgn0036751	Adgf-B	Adenosine deaminase-related growth factor B	1.0291	2.90898e-09	4.37887e-08
FBgn0036756	cln3	cln3	-0.522582	6.9933e-06	5.00792e-05
FBgn0036760	CG5567	-	0.320746	0.00752862	0.0255359
FBgn0036761	MED19	Mediator complex subunit 19	-0.416097	0.00117926	0.00505315
FBgn0036763	CG7441	-	0.547511	1.16103e-06	9.91723e-06
FBgn0036766	CG5506	-	0.699683	0.00301905	0.0115631
FBgn0036767	CG16775	-	4.01134	1.33993e-11	3.64756e-10
FBgn0036768	CG7402	-	-0.988582	3.18364e-10	6.18445e-09
FBgn0036769	Tsp74F	Tetraspanin 74F	0.299632	0.0135862	0.0424056
FBgn0036770	Prestin	Prestin	0.373687	0.000761477	0.00343342
FBgn0036773	CG13698	-	-0.317778	0.00835248	0.0278919
FBgn0036778	Cyp312a1	Cyp312a1	0.79258	0.000420283	0.0020176
FBgn0036784	CG5103	-	0.657502	5.97408e-07	5.41903e-06
FBgn0036785	CG13700	-	0.58535	6.27898e-06	4.55236e-05
FBgn0036806	Cyp12c1	Cyp12c1	-0.523563	2.02507e-06	1.63507e-05
FBgn0036807	CG6893	-	0.444926	0.00787714	0.026525
FBgn0036808	Dic4	Dicarboxylate carrier 4	0.407559	0.0130753	0.0410178
FBgn0036809	CG12477	-	-0.692985	3.52665e-06	2.67507e-05
FBgn0036816	Indy	I'm not dead yet	-0.668819	4.2568e-05	0.000258044
FBgn0036830	CG14077	-	0.775634	1.47308e-08	1.92194e-07
FBgn0036831	CG6839	-	3.80513	4.97191e-89	8.27538e-86
FBgn0036832	CG18223	-	0.731301	0.000546952	0.00256372
FBgn0036843	CG6812	-	-0.434178	8.45775e-05	0.000472393
FBgn0036846	MESR6	Misexpression suppressor of ras 6	-0.736627	4.91194e-07	4.53478e-06
FBgn0036848	CG10424	-	-0.336595	0.00381398	0.014188
[truncated: 1,857 more rows]

## Sheet: (B)Annotation_cluster_HYD_high
(B) List of functional annotation clusters that significantly enriched (enrichment score ≥ 1.3) in genes highly expressed on HYD rather than on LYD
Annotation Cluster	Enrichment Score	Category	Term	Count	%	PValue	List Total	Pop Hits	Pop Total	Fold Enrichment	Bonferroni	Benjamini	FDR	Genes
1	4.23468	INTERPRO	IPR017853:Glycoside hydrolase, superfamily	22	1.46862	8.0772e-08	1201	54	10984	3.72603	0.000120747	0.000120754	0.000119139	FBGN0032192, FBGN0020416, FBGN0034582, FBGN0032382, FBGN0020506, FBGN0041630, FBGN0064237, FBGN0270927, FBGN0038180, FBGN0041629, FBGN0029913, FBGN0022702, FBGN0026415, FBGN0250907, FBGN0022700, FBGN0020414, FBGN0001089, FBGN0000079, FBGN0000078, FBGN0050359, FBGN0034117, FBGN0031996
		INTERPRO	IPR013781:Glycoside hydrolase, catalytic domain	20	1.33511	1.62039e-07	1201	47	10984	3.89179	0.000242218	0.000121124	0.000119504	FBGN0020416, FBGN0034582, FBGN0032382, FBGN0020506, FBGN0041630, FBGN0064237, FBGN0270927, FBGN0038180, FBGN0041629, FBGN0029913, FBGN0022702, FBGN0026415, FBGN0250907, FBGN0022700, FBGN0020414, FBGN0001089, FBGN0000079, FBGN0000078, FBGN0050359, FBGN0031996
		GOTERM_BP_DIRECT	GO:0005975~carbohydrate metabolic process	29	1.93591	9.48188e-07	1093	106	10996	2.75237	0.0016163	0.000539203	0.000534778	FBGN0032192, FBGN0020506, FBGN0041629, FBGN0029913, FBGN0022702, FBGN0250907, FBGN0022700, FBGN0027538, FBGN0000079, FBGN0000078, FBGN0034117, FBGN0010222, FBGN0040323, FBGN0036144, FBGN0020416, FBGN0034582, FBGN0032382, FBGN0040321, FBGN0064237, FBGN0031099, FBGN0270927, FBGN0038180, FBGN0262782, FBGN0026415, FBGN0020414, FBGN0031717, FBGN0036327, FBGN0050359, FBGN0031996
		SMART	SM00636:Glyco_18	11	0.734312	1.48042e-06	549	17	5218	6.15001	0.00042331	0.000423399	0.000418958	FBGN0020416, FBGN0034582, FBGN0064237, FBGN0038180, FBGN0029913, FBGN0022702, FBGN0031996, FBGN0026415, FBGN0250907, FBGN0022700, FBGN0020414
		INTERPRO	IPR001223:Glycoside hydrolase, family 18, catalytic domain	11	0.734312	2.20736e-06	1201	17	10984	5.91781	0.00329457	0.000825	0.000813963	FBGN0020416, FBGN0034582, FBGN0064237, FBGN0038180, FBGN0029913, FBGN0022702, FBGN0031996, FBGN0026415, FBGN0250907, FBGN0022700, FBGN0020414
		INTERPRO	IPR011583:Chitinase II	11	0.734312	2.20736e-06	1201	17	10984	5.91781	0.00329457	0.000825	0.000813963	FBGN0020416, FBGN0034582, FBGN0064237, FBGN0038180, FBGN0029913, FBGN0022702, FBGN0031996, FBGN0026415, FBGN0250907, FBGN0022700, FBGN0020414
		UP_KEYWORDS	Glycosidase	27	1.8024	7.77036e-06	1435	101	13921	2.59335	0.00228964	0.00049824	0.000469527	FBGN0032192, FBGN0020506, FBGN0032253, FBGN0041629, FBGN0003748, FBGN0029913, FBGN0022702, FBGN0250907, FBGN0022700, FBGN0001089, FBGN0027611, FBGN0000079, FBGN0000078, FBGN0034117, FBGN0034997, FBGN0035528, FBGN0034162, FBGN0034582, FBGN0032382, FBGN0041630, FBGN0270927, FBGN0038180, FBGN0004429, FBGN0026415, FBGN0020414, FBGN0011740, FBGN0031996
		GOTERM_BP_DIRECT	GO:0006032~chitin catabolic process	11	0.734312	7.25392e-05	1093	25	10996	4.42657	0.116405	0.0176615	0.0175166	FBGN0020416, FBGN0034582, FBGN0064237, FBGN0038180, FBGN0029913, FBGN0022702, FBGN0031996, FBGN0026415, FBGN0250907, FBGN0022700, FBGN0020414
		GOTERM_MF_DIRECT	GO:0004568~chitinase activity	11	0.734312	0.000193104	990	26	9284	3.96752	0.133336	0.0476967	0.0474393	FBGN0020416, FBGN0034582, FBGN0064237, FBGN0038180, FBGN0029913, FBGN0022702, FBGN0031996, FBGN0026415, FBGN0250907, FBGN0022700, FBGN0020414
		INTERPRO	IPR001579:Glycoside hydrolase, chitinase active site	6	0.400534	0.0013329	1201	9	10984	6.09714	0.863853	0.104878	0.103475	FBGN0034582, FBGN0038180, FBGN0029913, FBGN0022702, FBGN0250907, FBGN0022700
		KEGG_PATHWAY	dme00520:Amino sugar and nucleotide sugar metabolism	12	0.801068	0.00963738	311	45	2737	2.34684	0.652006	0.103814	0.0885749	FBGN0034582, FBGN0031717, FBGN0041630, FBGN0003076, FBGN0034035, FBGN0031099, FBGN0038180, FBGN0041629, FBGN0029913, FBGN0022702, FBGN0250907, FBGN0022700
		GOTERM_BP_DIRECT	GO:0018990~ecdysis, chitin-based cuticle	7	0.46729	0.0138976	1093	21	10996	3.35346	1	0.526872	0.522548	FBGN0020416, FBGN0034582, FBGN0000568, FBGN0038180, FBGN0022702, FBGN0026415, FBGN0020414
		GOTERM_MF_DIRECT	GO:0008084~imaginal disc growth factor receptor binding	4	0.267023	0.0188234	990	6	9284	6.25185	0.999999	0.697408	0.693644	FBGN0020416, FBGN0064237, FBGN0026415, FBGN0020414
		GOTERM_MF_DIRECT	GO:0008061~chitin binding	18	1.2016	0.158268	990	123	9284	1.37236	1	1	0.995946	FBGN0020416, FBGN0034582, FBGN0039452, FBGN0035452, FBGN0035430, FBGN0064237, FBGN0038180, FBGN0029913, FBGN0022702, FBGN0026415, FBGN0250907, FBGN0038492, FBGN0022700, FBGN0020414, FBGN0034301, FBGN0035412, FBGN0031996, FBGN0035845
2	3.95732	SMART	SM00020:Tryp_SPc	50	3.33778	1.02163e-05	549	252	5218	1.88582	0.00291762	0.00146094	0.00144561	FBGN0036891, FBGN0038114, FBGN0020906, FBGN0261584, FBGN0050286, FBGN0031248, FBGN0027930, FBGN0032213, FBGN0051217, FBGN0036264, FBGN0037677, FBGN0035496, FBGN0053460, FBGN0085319, FBGN0039494, FBGN0053465, FBGN0037515, FBGN0031619, FBGN0037678, FBGN0051728, FBGN0031653, FBGN0030925, FBGN0035661, FBGN0033320, FBGN0033321, FBGN0033365, FBGN0030051, FBGN0038250, FBGN0030777, FBGN0032638, FBGN00326…
		INTERPRO	IPR009003:Trypsin-like cysteine/serine peptidase domain	53	3.53805	1.40835e-05	1201	263	10984	1.84305	0.0208349	0.00421098	0.00415465	FBGN0036891, FBGN0038114, FBGN0020906, FBGN0261584, FBGN0050286, FBGN0031248, FBGN0027930, FBGN0032213, FBGN0051217, FBGN0036264, FBGN0037677, FBGN0035496, FBGN0053460, FBGN0029828, FBGN0085319, FBGN0039494, FBGN0053465, FBGN0037515, FBGN0030927, FBGN0031619, FBGN0037678, FBGN0051728, FBGN0031653, FBGN0030925, FBGN0035065, FBGN0035661, FBGN0033320, FBGN0033321, FBGN0033365, FBGN0030051, FBGN00382…
		INTERPRO	IPR001254:Peptidase S1	51	3.40454	3.20856e-05	1201	257	10984	1.81491	0.0468364	0.00685256	0.00676089	FBGN0036891, FBGN0038114, FBGN0020906, FBGN0261584, FBGN0050286, FBGN0031248, FBGN0027930, FBGN0032213, FBGN0051217, FBGN0036264, FBGN0037677, FBGN0035496, FBGN0053460, FBGN0029828, FBGN0085319, FBGN0039494, FBGN0053465, FBGN0037515, FBGN0031619, FBGN0037678, FBGN0051728, FBGN0031653, FBGN0030925, FBGN0035661, FBGN0033320, FBGN0033321, FBGN0033365, FBGN0030051, FBGN0038250, FBGN0030777, FBGN00326…
		GOTERM_MF_DIRECT	GO:0004252~serine-type endopeptidase activity	53	3.53805	3.99435e-05	990	280	9284	1.77508	0.029165	0.0147991	0.0147192	FBGN0036891, FBGN0038114, FBGN0020906, FBGN0261584, FBGN0050286, FBGN0031248, FBGN0027930, FBGN0032213, FBGN0051217, FBGN0036264, FBGN0037677, FBGN0035496, FBGN0053460, FBGN0004509, FBGN0029828, FBGN0085319, FBGN0039494, FBGN0053465, FBGN0037515, FBGN0031619, FBGN0037678, FBGN0051728, FBGN0031653, FBGN0030925, FBGN0035065, FBGN0035661, FBGN0033320, FBGN0033321, FBGN0033365, FBGN0030051, FBGN00382…
		GOTERM_BP_DIRECT	GO:0006508~proteolysis	74	4.93992	9.31735e-05	1093	475	10996	1.5673	0.146971	0.0176615	0.0175166	FBGN0036891, FBGN0038114, FBGN0020906, FBGN0261584, FBGN0000455, FBGN0000454, FBGN0050286, FBGN0027578, FBGN0031248, FBGN0027930, FBGN0046253, FBGN0027570, FBGN0034513, FBGN0032213, FBGN0051217, FBGN0036264, FBGN0259716, FBGN0037396, FBGN0039613, FBGN0037677, FBGN0035496, FBGN0039611, FBGN0053460, FBGN0004509, FBGN0029828, FBGN0085319, FBGN0039494, FBGN0053465, FBGN0037515, FBGN0031619, FBGN00376…
		INTERPRO	IPR001314:Peptidase S1A, chymotrypsin-type	45	3.00401	0.000126703	1201	229	10984	1.79719	0.172572	0.0189421	0.0186887	FBGN0036891, FBGN0035661, FBGN0033320, FBGN0033365, FBGN0038114, FBGN0033321, FBGN0020906, FBGN0261584, FBGN0030051, FBGN0038250, FBGN0030777, FBGN0050286, FBGN0032638, FBGN0027930, FBGN0031248, FBGN0001285, FBGN0035666, FBGN0035501, FBGN0032213, FBGN0034139, FBGN0035667, FBGN0036436, FBGN0039108, FBGN0051217, FBGN0036264, FBGN0036287, FBGN0034221, FBGN0034661, FBGN0037677, FBGN0053460, FBGN00500…
		UP_KEYWORDS	Serine protease	31	2.06943	0.000189784	1435	147	13921	2.0458	0.054453	0.00650174	0.00612707	FBGN0036891, FBGN0035661, FBGN0033365, FBGN0038114, FBGN0020906, FBGN0030051, FBGN0027930, FBGN0031248, FBGN0001285, FBGN0035666, FBGN0035501, FBGN0034139, FBGN0036436, FBGN0039108, FBGN0051217, FBGN0036264, FBGN0036287, FBGN0034221, FBGN0034661, FBGN0037677, FBGN0004509, FBGN0085319, FBGN0003319, FBGN0039494, FBGN0003358, FBGN0265011, FBGN0037515, FBGN0031619, FBGN0037678, FBGN0051728, FBGN00309…
		INTERPRO	IPR018114:Peptidase S1, trypsin family, active site	35	2.33645	0.00174419	1201	186	10984	1.72097	0.926453	0.124169	0.122508	FBGN0036891, FBGN0035661, FBGN0033365, FBGN0038114, FBGN0020906, FBGN0030051, FBGN0038250, FBGN0050286, FBGN0027930, FBGN0031248, FBGN0001285, FBGN0035666, FBGN0035501, FBGN0032213, FBGN0034139, FBGN0036436, FBGN0039108, FBGN0051217, FBGN0036264, FBGN0036287, FBGN0034221, FBGN0034661, FBGN0037677, FBGN0050091, FBGN0085319, FBGN0039494, FBGN0003358, FBGN0050375, FBGN0265011, FBGN0037515, FBGN00316…
		UP_KEYWORDS	Protease	55	3.67156	0.00336048	1435	362	13921	1.47392	0.62954	0.0550745	0.0519007	FBGN0036891, FBGN0086359, FBGN0038114, FBGN0020906, FBGN0000455, FBGN0026404, FBGN0000454, FBGN0028984, FBGN0031248, FBGN0027930, FBGN0046253, FBGN0030310, FBGN0027053, FBGN0051217, FBGN0036264, FBGN0037677, FBGN0004509, FBGN0085319, FBGN0039494, FBGN0031298, FBGN0037515, FBGN0031619, FBGN0037678, FBGN0051728, FBGN0030925, FBGN0012037, FBGN0033438, FBGN0035661, FBGN0019972, FBGN0033365, FBGN02657…
3	3.8527	GOTERM_BP_DIRECT	GO:0055085~transmembrane transport	58	3.87183	3.15617e-07	1093	290	10996	2.01208	0.000538297	0.000269221	0.000267012	FBGN0015872, FBGN0037387, FBGN0019952, FBGN0016684, FBGN0035763, FBGN0039886, FBGN0033387, FBGN0038312, FBGN0028703, FBGN0028468, FBGN0031523, FBGN0264574, FBGN0031522, FBGN0033388, FBGN0035767, FBGN0033665, FBGN0038719, FBGN0036816, FBGN0035968, FBGN0038716, FBGN0264907, FBGN0039178, FBGN0036741, FBGN0038720, FBGN0031011, FBGN0260743, FBGN0011589, FBGN0034885, FBGN0034884, FBGN0032026, FBGN00372…
		INTERPRO	IPR020846:Major facilitator superfamily domain	39	2.60347	2.36306e-05	1201	175	10984	2.03819	0.0347115	0.00588797	0.0058092	FBGN0037387, FBGN0019952, FBGN0016684, FBGN0035763, FBGN0039886, FBGN0033387, FBGN0038053, FBGN0034490, FBGN0034093, FBGN0028468, FBGN0029898, FBGN0031523, FBGN0264574, FBGN0031522, FBGN0029932, FBGN0028563, FBGN0029896, FBGN0259164, FBGN0033388, FBGN0033289, FBGN0036756, FBGN0035767, FBGN0038719, FBGN0035968, FBGN0038716, FBGN0264907, FBGN0039178, FBGN0038720, FBGN0037730, FBGN0031011, FBGN00243…
		INTERPRO	IPR005828:General substrate transporter	17	1.13485	0.000428684	1201	59	10984	2.63521	0.473245	0.0492986	0.0486391	FBGN0037387, FBGN0039178, FBGN0019952, FBGN0038720, FBGN0053282, FBGN0038260, FBGN0031523, FBGN0264574, FBGN0029932, FBGN0031522, FBGN0028563, FBGN0051100, FBGN0029896, FBGN0259164, FBGN0038719, FBGN0031517, FBGN0038716
		GOTERM_MF_DIRECT	GO:0022857~transmembrane transporter activity	20	1.33511	0.00147791	990	86	9284	2.18088	0.665775	0.219026	0.217844	FBGN0264907, FBGN0039178, FBGN0016684, FBGN0019952, FBGN0038720, FBGN0039886, FBGN0024315, FBGN0020762, FBGN0053282, FBGN0034490, FBGN0038260, FBGN0028646, FBGN0031523, FBGN0031522, FBGN0051100, FBGN0029896, FBGN0259164, FBGN0038719, FBGN0031517, FBGN0038716
		GOTERM_MF_DIRECT	GO:0015101~organic cation transmembrane transporter activity	7	0.46729	0.0115361	990	19	9284	3.45497	0.999816	0.569884	0.566807	FBGN0264907, FBGN0019952, FBGN0038720, FBGN0259164, FBGN0038719, FBGN0038260, FBGN0038716
4	3.61902	GOTERM_CC_DIRECT	GO:0016021~integral component of membrane	346	23.0975	1.51938e-05	1023	2814	10026	1.20505	0.00486537	0.0024386	0.00239302	FBGN0034075, FBGN0039886, FBGN0038312, FBGN0085308, FBGN0243486, FBGN0029838, FBGN0028506, FBGN0040636, FBGN0031126, FBGN0038318, FBGN0037469, FBGN0033665, FBGN0034997, FBGN0037228, FBGN0034999, FBGN0036816, FBGN0041160, FBGN0035845, FBGN0036934, FBGN0035968, FBGN0036144, FBGN0062412, FBGN0033550, FBGN0062413, FBGN0037235, FBGN0031011, FBGN0029828, FBGN0262567, FBGN0053143, FBGN0031250, FBGN00314…
		UP_KEYWORDS	Membrane	389	25.968	0.000450138	1435	3266	13921	1.15545	0.124378	0.0132791	0.0125138	FBGN0039882, FBGN0034075, FBGN0039886, FBGN0038312, FBGN0085308, FBGN0003206, FBGN0243486, FBGN0029838, FBGN0028506, FBGN0040636, FBGN0038318, FBGN0037469, FBGN0037228, FBGN0014469, FBGN0036144, FBGN0036141, FBGN0062412, FBGN0062413, FBGN0037235, FBGN0029828, FBGN0037592, FBGN0267336, FBGN0051522, FBGN0031937, FBGN0265274, FBGN0031939, FBGN0037239, FBGN0030847, FBGN0032900, FBGN0062442, FBGN00384…
		UP_KEYWORDS	Transmembrane helix	357	23.8318	0.000677375	1435	2985	13921	1.16023	0.181182	0.0163672	0.015424	FBGN0039882, FBGN0034075, FBGN0039886, FBGN0038312, FBGN0085308, FBGN0243486, FBGN0029838, FBGN0028506, FBGN0040636, FBGN0031126, FBGN0038318, FBGN0037469, FBGN0033665, FBGN0034997, FBGN0037228, FBGN0034999, FBGN0036816, FBGN0041160, FBGN0035845, FBGN0036934, FBGN0035968, FBGN0036144, FBGN0036141, FBGN0062412, FBGN0033550, FBGN0062413, FBGN0037235, FBGN0016078, FBGN0031011, FBGN0029828, FBGN02625…
		UP_KEYWORDS	Transmembrane	357	23.8318	0.000721267	1435	2990	13921	1.15829	0.191723	0.0163672	0.015424	FBGN0039882, FBGN0034075, FBGN0039886, FBGN0038312, FBGN0085308, FBGN0243486, FBGN0029838, FBGN0028506, FBGN0040636, FBGN0031126, FBGN0038318, FBGN0037469, FBGN0033665, FBGN0034997, FBGN0037228, FBGN0034999, FBGN0036816, FBGN0041160, FBGN0035845, FBGN0036934, FBGN0035968, FBGN0036144, FBGN0036141, FBGN0062412, FBGN0033550, FBGN0062413, FBGN0037235, FBGN0016078, FBGN0031011, FBGN0029828, FBGN02625…
5	2.90963	INTERPRO	IPR001071:Cellular retinaldehyde binding/alpha-tocopherol transport	10	0.667557	7.1718e-05	1201	19	10984	4.81353	0.101674	0.0119131	0.0117538	FBGN0031913, FBGN0053514, FBGN0029863, FBGN0037323, FBGN0035146, FBGN0036289, FBGN0032783, FBGN0032785, FBGN0033437, FBGN0051636
		SMART	SM00516:SEC14	11	0.734312	0.000472586	549	29	5218	3.60518	0.126452	0.0337899	0.0334355	FBGN0031913, FBGN0053514, FBGN0029863, FBGN0037323, FBGN0035146, FBGN0036289, FBGN0032783, FBGN0032785, FBGN0038966, FBGN0033437, FBGN0051636
		INTERPRO	IPR011074:CRAL/TRIO, N-terminal domain	11	0.734312	0.000664318	1201	29	10984	3.46906	0.629716	0.0662103	0.0653246	FBGN0031913, FBGN0053514, FBGN0029863, FBGN0037323, FBGN0035146, FBGN0036289, FBGN0032783, FBGN0032785, FBGN0038966, FBGN0033437, FBGN0051636
		INTERPRO	IPR001251:CRAL-TRIO domain	12	0.801068	0.000881269	1201	35	10984	3.13567	0.732351	0.0823435	0.081242	FBGN0031913, FBGN0053514, FBGN0029863, FBGN0037323, FBGN0035146, FBGN0036289, FBGN0032783, FBGN0032785, FBGN0038966, FBGN0033437, FBGN0051636, FBGN0035308
		SMART	SM01100:SM01100	7	0.46729	0.00284757	549	15	5218	4.43546	0.557612	0.116162	0.114943	FBGN0031913, FBGN0053514, FBGN0035146, FBGN0036289, FBGN0032783, FBGN0032785, FBGN0051636
		GOTERM_MF_DIRECT	GO:0005215~transporter activity	22	1.46862	0.00499812	990	109	9284	1.89276	0.975593	0.389042	0.386942	FBGN0015872, FBGN0034494, FBGN0032172, FBGN0011672, FBGN0037323, FBGN0037730, FBGN0035146, FBGN0036289, FBGN0028539, FBGN0028468, FBGN0031913, FBGN0053514, FBGN0027660, FBGN0029863, FBGN0033443, FBGN0032783, FBGN0032785, FBGN0038404, FBGN0036816, FBGN0033437, FBGN0037913, FBGN0051636
		GOTERM_BP_DIRECT	GO:0006810~transport	20	1.33511	0.0151963	1093	113	10996	1.7806	1	0.540345	0.53591	FBGN0034470, FBGN0034032, FBGN0032172, FBGN0037323, FBGN0035146, FBGN0036289, FBGN0000339, FBGN0028539, FBGN0000241, FBGN0031913, FBGN0053514, FBGN0027660, FBGN0053970, FBGN0029863, FBGN0033443, FBGN0032783, FBGN0032785, FBGN0033437, FBGN0037913, FBGN0051636
6	2.68652	UP_SEQ_FEATURE	signal peptide	68	4.53939	6.66597e-06	296	427	3113	1.67482	0.00525893	0.00527945	0.00527945	FBGN0034470, FBGN0020506, FBGN0040717, FBGN0029838, FBGN0000299, FBGN0003046, FBGN0262473, FBGN0030310, FBGN0023495, FBGN0010225, FBGN0010388, FBGN0040323, FBGN0020416, FBGN0036141, FBGN0044048, FBGN0040321, FBGN0064237, FBGN0044047, FBGN0016031, FBGN0004509, FBGN0004429, FBGN0001114, FBGN0020414, FBGN0011828, FBGN0003378, FBGN0000024, FBGN0002562, FBGN0001112, FBGN0003377, FBGN0003374, FBGN00034…
		UP_SEQ_FEATURE	disulfide bond	40	2.67023	0.00267768	296	265	3113	1.58746	0.880075	0.620771	0.620771	FBGN0034470, FBGN0261800, FBGN0020506, FBGN0086359, FBGN0031381, FBGN0250907, FBGN0267348, FBGN0030876, FBGN0000594, FBGN0000079, FBGN0000299, FBGN0000078, FBGN0030310, FBGN0000071, FBGN0035623, FBGN0020416, FBGN0043577, FBGN0044048, FBGN0036046, FBGN0064237, FBGN0003719, FBGN0043575, FBGN0044047, FBGN0004509, FBGN0003319, FBGN0004429, FBGN0001114, FBGN0026415, FBGN0003358, FBGN0020414, FBGN00118…
		UP_SEQ_FEATURE	glycosylation site:N-linked (GlcNAc...)	53	3.53805	0.023287	296	423	3113	1.31772	1	1	1	FBGN0039045, FBGN0019952, FBGN0011672, FBGN0086359, FBGN0029838, FBGN0000299, FBGN0264574, FBGN0003366, FBGN0262473, FBGN0023495, FBGN0040323, FBGN0020416, FBGN0036144, FBGN0036141, FBGN0040321, FBGN0064237, FBGN0016078, FBGN0016031, FBGN0004509, FBGN0001114, FBGN0020414, FBGN0011828, FBGN0000024, FBGN0003495, FBGN0023000, FBGN0005592, FBGN0036988, FBGN0035975, FBGN0012037, FBGN0010415, FBGN00152…
		UP_KEYWORDS	Glycoprotein	65	4.33912	0.04317	1435	503	13921	1.25361	0.999998	0.432411	0.407493	FBGN0039045, FBGN0019952, FBGN0011672, FBGN0028988, FBGN0029838, FBGN0000299, FBGN0264574, FBGN0027930, FBGN0003366, FBGN0262473, FBGN0023495, FBGN0010388, FBGN0051217, FBGN0040323, FBGN0020416, FBGN0036144, FBGN0036141, FBGN0040321, FBGN0064237, FBGN0016078, FBGN0016031, FBGN0004509, FBGN0261277, FBGN0001114, FBGN0020414, FBGN0011828, FBGN0000024, FBGN0003495, FBGN0023000, FBGN0037515, FBGN00055…
7	2.26226	INTERPRO	IPR005828:General substrate transporter	17	1.13485	0.000428684	1201	59	10984	2.63521	0.473245	0.0492986	0.0486391	FBGN0037387, FBGN0039178, FBGN0019952, FBGN0038720, FBGN0053282, FBGN0038260, FBGN0031523, FBGN0264574, FBGN0029932, FBGN0031522, FBGN0028563, FBGN0051100, FBGN0029896, FBGN0259164, FBGN0038719, FBGN0031517, FBGN0038716
		INTERPRO	IPR005829:Sugar transporter, conserved site	12	0.801068	0.00147164	1201	37	10984	2.96618	0.889387	0.110005	0.108533	FBGN0028468, FBGN0037387, FBGN0031523, FBGN0264574, FBGN0029932, FBGN0031522, FBGN0028563, FBGN0051100, FBGN0029896, FBGN0038404, FBGN0031517, FBGN0053282
		GOTERM_BP_DIRECT	GO:0046323~glucose import	7	0.46729	0.0108163	1093	20	10996	3.52113	1	0.450064	0.44637	FBGN0037387, FBGN0031523, FBGN0029932, FBGN0031522, FBGN0051100, FBGN0031517, FBGN0053282
		GOTERM_BP_DIRECT	GO:0035428~hexose transmembrane transport	7	0.46729	0.0108163	1093	20	10996	3.52113	1	0.450064	0.44637	FBGN0037387, FBGN0031523, FBGN0029932, FBGN0031522, FBGN0051100, FBGN0031517, FBGN0053282
		GOTERM_MF_DIRECT	GO:0005355~glucose transmembrane transporter activity	7	0.46729	0.015027	990	20	9284	3.28222	0.999987	0.586053	0.58289	FBGN0037387, FBGN0031523, FBGN0029932, FBGN0031522, FBGN0051100, FBGN0031517, FBGN0053282
		GOTERM_MF_DIRECT	GO:0005351~sugar:proton symporter activity	7	0.46729	0.024069	990	22	9284	2.98384	1	0.849291	0.844707	FBGN0037387, FBGN0031523, FBGN0029932, FBGN0031522, FBGN0051100, FBGN0031517, FBGN0053282
8	2.25731	INTERPRO	IPR001507:Zona pellucida domain	9	0.600801	0.000317136	1201	18	10984	4.57286	0.377613	0.0395098	0.0389813	FBGN0039851, FBGN0029128, FBGN0028622, FBGN0004511, FBGN0039852, FBGN0037972, FBGN0039704, FBGN0020521, FBGN0002577
		SMART	SM00241:ZP	8	0.534045	0.000664472	549	16	5218	4.75228	0.173125	0.0380078	0.0376091	FBGN0039851, FBGN0029128, FBGN0028622, FBGN0004511, FBGN0039852, FBGN0039704, FBGN0020521, FBGN0002577
		GOTERM_BP_DIRECT	GO:0022404~molting cycle process	5	0.333778	0.00264716	1093	7	10996	7.18599	0.989133	0.215338	0.213571	FBGN0039851, FBGN0029128, FBGN0039852, FBGN0039704, FBGN0259226
		SMART	SM00473:PAN_AP	5	0.333778	0.00324927	549	7	5218	6.78897	0.605764	0.116162	0.114943	FBGN0039851, FBGN0029128, FBGN0039852, FBGN0039704, FBGN0259226
		INTERPRO	IPR003609:Apple-like	5	0.333778	0.00378021	1201	7	10984	6.53265	0.996525	0.209311	0.206511	FBGN0039851, FBGN0029128, FBGN0039852, FBGN0039704, FBGN0259226
		GOTERM_BP_DIRECT	GO:0003383~apical constriction	5	0.333778	0.018045	1093	11	10996	4.5729	1	0.549728	0.545217	FBGN0039851, FBGN0029128, FBGN0039852, FBGN0039704, FBGN0002577
		GOTERM_BP_DIRECT	GO:0042335~cuticle development	5	0.333778	0.0542547	1093	15	10996	3.35346	1	1	0.992375	FBGN0039851, FBGN0029128, FBGN0039852, FBGN0039704, FBGN0259226
		GOTERM_BP_DIRECT	GO:0016476~regulation of embryonic cell shape	5	0.333778	0.130301	1093	20	10996	2.5151	1	1	0.992375	FBGN0039851, FBGN0029128, FBGN0039852, FBGN0039704, FBGN0002577
9	2.18923	UP_KEYWORDS	Pyridoxal phosphate	10	0.667557	0.00188617	1435	29	13921	3.34519	0.427044	0.0347763	0.0327723	FBGN0010591, FBGN0029823, FBGN0036927, FBGN0037186, FBGN0037801, FBGN0022774, FBGN0000422, FBGN0036381, FBGN0014427, FBGN0000566
		INTERPRO	IPR015421:Pyridoxal phosphate-dependent transferase, major region, subdomain 1	11	0.734312	0.00204481	1201	33	10984	3.04857	0.953118	0.138954	0.137096	FBGN0010591, FBGN0029823, FBGN0036927, FBGN0037186, FBGN0037801, FBGN0022774, FBGN0000422, FBGN0036381, FBGN0001125, FBGN0014427, FBGN0000566
		UP_KEYWORDS	Aminotransferase	7	0.46729	0.00260479	1435	15	13921	4.52715	0.536717	0.0452008	0.042596	FBGN0036927, FBGN0037186, FBGN0032287, FBGN0022774, FBGN0036381, FBGN0001125, FBGN0014427
		INTERPRO	IPR015424:Pyridoxal phosphate-dependent transferase	11	0.734312	0.00261785	1201	34	10984	2.95891	0.980135	0.150526	0.148513	FBGN0010591, FBGN0029823, FBGN0036927, FBGN0037186, FBGN0037801, FBGN0022774, FBGN0000422, FBGN0036381, FBGN0001125, FBGN0014427, FBGN0000566
		INTERPRO	IPR005814:Aminotransferase class-III	4	0.267023	0.00477873	1201	4	10984	9.14571	0.999224	0.25515	0.251737	FBGN0036927, FBGN0037186, FBGN0022774, FBGN0036381
		GOTERM_MF_DIRECT	GO:0030170~pyridoxal phosphate binding	10	0.667557	0.0076378	990	34	9284	2.75817	0.996591	0.435355	0.433004	FBGN0010591, FBGN0029823, FBGN0036927, FBGN0037186, FBGN0033451, FBGN0022774, FBGN0000422, FBGN0036381, FBGN0001125, FBGN0000566
		INTERPRO	IPR015422:Pyridoxal phosphate-dependent transferase, major region, subdomain 2	8	0.534045	0.0186001	1201	26	10984	2.81407	1	0.77242	0.762086	FBGN0029823, FBGN0036927, FBGN0037186, FBGN0022774, FBGN0000422, FBGN0036381, FBGN0014427, FBGN0000566
		GOTERM_MF_DIRECT	GO:0042802~identical protein binding	6	0.400534	0.171546	990	28	9284	2.00952	1	1	0.995946	FBGN0036927, FBGN0037186, FBGN0020299, FBGN0022774, FBGN0036381, FBGN0001125
10	2.0261	GOTERM_BP_DIRECT	GO:0006497~protein lipidation	6	0.400534	0.000856832	1093	9	10996	6.70692	0.768316	0.0950274	0.0942475	FBGN0032935, FBGN0034366, FBGN0011296, FBGN0035850, FBGN0001229, FBGN0037648
		GOTERM_BP_DIRECT	GO:0000045~autophagosome assembly	9	0.600801	0.00213418	1093	25	10996	3.62174	0.973874	0.191627	0.190055	FBGN0032935, FBGN0052672, FBGN0034366, FBGN0035850, FBGN0031298, FBGN0035542, FBGN0037648, FBGN0044452, FBGN0264325
		GOTERM_BP_DIRECT	GO:0044804~nucleophagy	6	0.400534	0.00265071	1093	11	10996	5.48748	0.989199	0.215338	0.213571	FBGN0032935, FBGN0035850, FBGN0031298, FBGN0037648, FBGN0044452, FBGN0264325
		GOTERM_BP_DIRECT	GO:0000422~mitophagy	8	0.534045	0.00311318	1093	21	10996	3.83253	0.995104	0.230917	0.229022	FBGN0032935, FBGN0052672, FBGN0034366, FBGN0035850, FBGN0031298, FBGN0037648, FBGN0044452, FBGN0034897
		GOTERM_MF_DIRECT	GO:0032266~phosphatidylinositol-3-phosphate binding	6	0.400534	0.00361961	990	11	9284	5.11515	0.931915	0.335266	0.333456	FBGN0032935, FBGN0031534, FBGN0035850, FBGN0037648, FBGN0038065, FBGN0052758
		GOTERM_BP_DIRECT	GO:0034497~protein localization to pre-autophagosomal structure	3	0.200267	0.0804148	1093	5	10996	6.03623	1	1	0.992375	FBGN0032935, FBGN0035850, FBGN0037648
		GOTERM_MF_DIRECT	GO:0080025~phosphatidylinositol-3,5-bisphosphate binding	3	0.200267	0.091133	990	5	9284	5.62667	1	1	0.995946	FBGN0032935, FBGN0035850, FBGN0037648
		GOTERM_CC_DIRECT	GO:0034045~pre-autophagosomal structure membrane	3	0.200267	0.154465	1023	7	10026	4.20025	1	1	0.984375	FBGN0032935, FBGN0035850, FBGN0037648
11	1.9422	GOTERM_BP_DIRECT	GO:0035096~larval midgut cell programmed cell death	10	0.667557	0.000594973	1093	26	10996	3.86938	0.637716	0.0780788	0.0774381	FBGN0260945, FBGN0052672, FBGN0264490, FBGN0034366, FBGN0035850, FBGN0031298, FBGN0260935, FBGN0044452, FBGN0264325, FBGN0003997
		GOTERM_BP_DIRECT	GO:0016236~macroautophagy	7	0.46729	0.00140852	1093	14	10996	5.03019	0.909701	0.133496	0.132401	FBGN0260945, FBGN0052672, FBGN0034366, FBGN0035850, FBGN0260935, FBGN0044452, FBGN0030838
		GOTERM_BP_DIRECT	GO:0000045~autophagosome assembly	9	0.600801	0.00213418	1093	25	10996	3.62174	0.973874	0.191627	0.190055	FBGN0032935, FBGN0052672, FBGN0034366, FBGN0035850, FBGN0031298, FBGN0035542, FBGN0037648, FBGN0044452, FBGN0264325
		GOTERM_BP_DIRECT	GO:0044804~nucleophagy	6	0.400534	0.00265071	1093	11	10996	5.48748	0.989199	0.215338	0.213571	FBGN0032935, FBGN0035850, FBGN0031298, FBGN0037648, FBGN0044452, FBGN0264325
		GOTERM_BP_DIRECT	GO:0000422~mitophagy	8	0.534045	0.00311318	1093	21	10996	3.83253	0.995104	0.230917	0.229022	FBGN0032935, FBGN0052672, FBGN0034366, FBGN0035850, FBGN0031298, FBGN0037648, FBGN0044452, FBGN0034897
		GOTERM_BP_DIRECT	GO:0006914~autophagy	13	0.867824	0.00494544	1093	53	10996	2.46764	0.999788	0.301319	0.298846	FBGN0260945, FBGN0034366, FBGN0035850, FBGN0260935, FBGN0003507, FBGN0264325, FBGN0264357, FBGN0004387, FBGN0052672, FBGN0264490, FBGN0031298, FBGN0044452, FBGN0038129
		KEGG_PATHWAY	dme04140:Regulation of autophagy	7	0.46729	0.011429	311	18	2737	3.42247	0.714335	0.103814	0.0885749	FBGN0260945, FBGN0052672, FBGN0034366, FBGN0031298, FBGN0260935, FBGN0037679, FBGN0264325
		GOTERM_CC_DIRECT	GO:0000407~pre-autophagosomal structure	5	0.333778	0.0272374	1023	12	10026	4.08358	0.999859	0.546449	0.536235	FBGN0034366, FBGN0035850, FBGN0044452, FBGN0030838, FBGN0264325
		GOTERM_BP_DIRECT	GO:0061723~glycophagy	4	0.267023	0.0879979	1093	11	10996	3.65832	1	1	0.992375	FBGN0260945, FBGN0035850, FBGN0044452, FBGN0264325
		GOTERM_BP_DIRECT	GO:0014067~negative regulation of phosphatidylinositol 3-kinase signaling	3	0.200267	0.112862	1093	6	10996	5.03019	1	1	0.992375	FBGN0260945, FBGN0035850, FBGN0044452
		GOTERM_BP_DIRECT	GO:0035069~larval midgut histolysis	3	0.200267	0.147937	1093	7	10996	4.31159	1	1	0.992375	FBGN0260945, FBGN0035850, FBGN0044452
		GOTERM_BP_DIRECT	GO:0006995~cellular response to nitrogen starvation	3	0.200267	0.147937	1093	7	10996	4.31159	1	1	0.992375	FBGN0052672, FBGN0034366, FBGN0264325
12	1.87804	UP_SEQ_FEATURE	metal ion-binding site:Iron (heme axial ligand)	22	1.46862	0.00016957	296	96	3113	2.41012	0.125533	0.0671496	0.0671496	FBGN0013772, FBGN0033981, FBGN0004959, FBGN0000406, FBGN0000449, FBGN0038194, FBGN0011828, FBGN0003312, FBGN0030369, FBGN0036806, FBGN0031126, FBGN0003388, FBGN0050489, FBGN0031432, FBGN0025454, FBGN0000261, FBGN0011676, FBGN0033775, FBGN0014469, FBGN0034756, FBGN0030966, FBGN0031689
		UP_KEYWORDS	Iron	37	2.46996	0.000198358	1435	189	13921	1.89915	0.056842	0.00650174	0.00612707	FBGN0062442, FBGN0013772, FBGN0033981, FBGN0004959, FBGN0053099, FBGN0003308, FBGN0001208, FBGN0034094, FBGN0086917, FBGN0038194, FBGN0263241, FBGN0031126, FBGN0003388, FBGN0050489, FBGN0025454, FBGN0033465, FBGN0032652, FBGN0011676, FBGN0014469, FBGN0034756, FBGN0031689, FBGN0013678, FBGN0034364, FBGN0001977, FBGN0000406, FBGN0000449, FBGN0024958, FBGN0011828, FBGN0003312, FBGN0030369, FBGN00368…
		UP_KEYWORDS	Heme	25	1.66889	0.000650554	1435	116	13921	2.09074	0.174673	0.0163672	0.015424	FBGN0013772, FBGN0033981, FBGN0004959, FBGN0086917, FBGN0038194, FBGN0031126, FBGN0003388, FBGN0050489, FBGN0025454, FBGN0032652, FBGN0011676, FBGN0014469, FBGN0034756, FBGN0031689, FBGN0013678, FBGN0000406, FBGN0000449, FBGN0011828, FBGN0003312, FBGN0030369, FBGN0036806, FBGN0031432, FBGN0000261, FBGN0033775, FBGN0030966
		GOTERM_MF_DIRECT	GO:0020037~heme binding	27	1.8024	0.00137614	990	132	9284	1.91818	0.639558	0.219026	0.217844	FBGN0013772, FBGN0033981, FBGN0004959, FBGN0086917, FBGN0038194, FBGN0031126, FBGN0003388, FBGN0050489, FBGN0005640, FBGN0025454, FBGN0032652, FBGN0011676, FBGN0014469, FBGN0034756, FBGN0031689, FBGN0038465, FBGN0000568, FBGN0000406, FBGN0000449, FBGN0011828, FBGN0003312, FBGN0030369, FBGN0036806, FBGN0031432, FBGN0000261, FBGN0033775, FBGN0030966
		UP_KEYWORDS	Monooxygenase	21	1.40187	0.00386034	1435	103	13921	1.97788	0.680502	0.0599369	0.0564829	FBGN0013772, FBGN0033981, FBGN0004959, FBGN0000449, FBGN0001208, FBGN0086917, FBGN0038194, FBGN0003312, FBGN0030369, FBGN0036806, FBGN0031126, FBGN0003388, FBGN0050489, FBGN0031432, FBGN0025454, FBGN0033367, FBGN0033775, FBGN0053208, FBGN0014469, FBGN0034756, FBGN0031689
		INTERPRO	IPR002401:Cytochrome P450, E-class, group I	17	1.13485	0.00814668	1201	77	10984	2.01918	0.999995	0.405976	0.400545	FBGN0013772, FBGN0033981, FBGN0004959, FBGN0000449, FBGN0086917, FBGN0038194, FBGN0003312, FBGN0036806, FBGN0031126, FBGN0003388, FBGN0050489, FBGN0031432, FBGN0025454, FBGN0033775, FBGN0014469, FBGN0034756, FBGN0031689
		COG_ONTOLOGY	Secondary metabolites biosynthesis, transport, and catabolism	18	1.2016	0.00873078	129	91	1239	1.89982	0.203873	0.218269	0.218269	FBGN0013772, FBGN0033981, FBGN0004959, FBGN0000449, FBGN0086917, FBGN0038194, FBGN0003312, FBGN0030369, FBGN0036806, FBGN0031126, FBGN0003388, FBGN0050489, FBGN0031432, FBGN0025454, FBGN0033775, FBGN0014469, FBGN0034756, FBGN0031689
		INTERPRO	IPR017972:Cytochrome P450, conserved site	17	1.13485	0.0117716	1201	80	10984	1.94346	1	0.533288	0.526153	FBGN0013772, FBGN0033981, FBGN0004959, FBGN0000449, FBGN0086917, FBGN0038194, FBGN0030369, FBGN0036806, FBGN0031126, FBGN0003388, FBGN0050489, FBGN0031432, FBGN0025454, FBGN0033775, FBGN0014469, FBGN0034756, FBGN0031689
		INTERPRO	IPR001128:Cytochrome P450	18	1.2016	0.0134978	1201	88	10984	1.87071	1	0.593508	0.585568	FBGN0013772, FBGN0033981, FBGN0004959, FBGN0000449, FBGN0086917, FBGN0038194, FBGN0003312, FBGN0030369, FBGN0036806, FBGN0031126, FBGN0003388, FBGN0050489, FBGN0031432, FBGN0025454, FBGN0033775, FBGN0014469, FBGN0034756, FBGN0031689
		GOTERM_MF_DIRECT	GO:0016705~oxidoreductase activity, acting on paired donors, with incorporation or reduction of molecular oxygen	18	1.2016	0.0146795	990	91	9284	1.85495	0.999983	0.586053	0.58289	FBGN0013772, FBGN0036147, FBGN0033981, FBGN0004959, FBGN0000449, FBGN0086917, FBGN0038194, FBGN0003312, FBGN0030369, FBGN0036806, FBGN0031126, FBGN0050489, FBGN0031432, FBGN0025454, FBGN0033775, FBGN0014469, FBGN0034756, FBGN0031689
		GOTERM_BP_DIRECT	GO:0046680~response to DDT	8	0.534045	0.0171544	1093	28	10996	2.8744	1	0.549728	0.545217	FBGN0013772, FBGN0031126, FBGN0050489, FBGN0025454, FBGN0033981, FBGN0034756, FBGN0031689, FBGN0038194
		GOTERM_BP_DIRECT	GO:0046701~insecticide catabolic process	7	0.46729	0.0217906	1093	23	10996	3.06186	1	0.63008	0.624909	FBGN0013772, FBGN0031126, FBGN0025454, FBGN0033981, FBGN0034756, FBGN0031689, FBGN0038194
		GOTERM_MF_DIRECT	GO:0005506~iron ion binding	24	1.60214	0.040446	990	148	9284	1.52072	1	1	0.995946	FBGN0013772, FBGN0036147, FBGN0034364, FBGN0033981, FBGN0004959, FBGN0000449, FBGN0003308, FBGN0001208, FBGN0086917, FBGN0038194, FBGN0003312, FBGN0030369, FBGN0036806, FBGN0031126, FBGN0003388, FBGN0050489, FBGN0031432, FBGN0030485, FBGN0025454, FBGN0011676, FBGN0033775, FBGN0014469, FBGN0034756, FBGN0031689
		GOTERM_MF_DIRECT	GO:0004497~monooxygenase activity	15	1.00134	0.0813152	990	88	9284	1.59848	1	1	0.995946	FBGN0013772, FBGN0033981, FBGN0004959, FBGN0086917, FBGN0038194, FBGN0030369, FBGN0036806, FBGN0031126, FBGN0050489, FBGN0031432, FBGN0025454, FBGN0033775, FBGN0014469, FBGN0034756, FBGN0031689
		GOTERM_CC_DIRECT	GO:0031090~organelle membrane	12	0.801068	0.177754	1023	79	10026	1.4887	1	1	0.984375	FBGN0013772, FBGN0030369, FBGN0031126, FBGN0031432, FBGN0025454, FBGN0033981, FBGN0004959, FBGN0033775, FBGN0014469, FBGN0034756, FBGN0031689, FBGN0038194
		UP_KEYWORDS	Microsome	12	0.801068	0.186749	1435	79	13921	1.47358	1	0.979331	0.922895	FBGN0013772, FBGN0030369, FBGN0031126, FBGN0031432, FBGN0025454, FBGN0033981, FBGN0004959, FBGN0033775, FBGN0014469, FBGN0034756, FBGN0031689, FBGN0038194
		UP_KEYWORDS	Endoplasmic reticulum	22	1.46862	0.343006	1435	184	13921	1.15991	1	1	0.945578	FBGN0010591, FBGN0062442, FBGN0013772, FBGN0036141, FBGN0033981, FBGN0004959, FBGN0000339, FBGN0038194, FBGN0264077, FBGN0030369, FBGN0004797, FBGN0004003, FBGN0031126, FBGN0030377, FBGN0031432, FBGN0025454, FBGN0037612, FBGN0033775, FBGN0014469, FBGN0034756, FBGN0030329, FBGN0031689
		GOTERM_CC_DIRECT	GO:0005789~endoplasmic reticulum membrane	23	1.53538	0.580667	1023	221	10026	1.01997	1	1	0.984375	FBGN0010470, FBGN0010591, FBGN0062442, FBGN0013772, FBGN0036893, FBGN0033981, FBGN0039160, FBGN0004959, FBGN0000339, FBGN0038194, FBGN0264077, FBGN0030369, FBGN0004797, FBGN0031126, FBGN0031432, FBGN0030485, FBGN0025454, FBGN0029174, FBGN0037612, FBGN0033775, FBGN0014469, FBGN0034756, FBGN0031689
13	1.81919	GOTERM_BP_DIRECT	GO:0008063~Toll signaling pathway	12	0.801068	0.000389235	1093	35	10996	3.44927	0.485296	0.0603668	0.0598714	FBGN0004003, FBGN0003882, FBGN0261526, FBGN0262473, FBGN0010441, FBGN0003495, FBGN0030310, FBGN0035056, FBGN0025574, FBGN0028990, FBGN0014018, FBGN0002930
		GOTERM_BP_DIRECT	GO:0019732~antifungal humoral response	5	0.333778	0.00487959	1093	8	10996	6.28774	0.999762	0.301319	0.298846	FBGN0003882, FBGN0262473, FBGN0010441, FBGN0003495, FBGN0002930
		GOTERM_BP_DIRECT	GO:0030097~hemopoiesis	8	0.534045	0.00550256	1093	23	10996	3.49926	0.999918	0.323702	0.321046	FBGN0003882, FBGN0262473, FBGN0010441, FBGN0003507, FBGN0016917, FBGN0032006, FBGN0264325, FBGN0003963
		GOTERM_BP_DIRECT	GO:0035172~hemocyte proliferation	5	0.333778	0.018045	1093	11	10996	4.5729	1	0.549728	0.545217	FBGN0003882, FBGN0262473, FBGN0010441, FBGN0016917, FBGN0032006
		GOTERM_BP_DIRECT	GO:0006952~defense response	8	0.534045	0.0463808	1093	34	10996	2.36715	1	1	0.992375	FBGN0003882, FBGN0013983, FBGN0262473, FBGN0010441, FBGN0003495, FBGN0016917, FBGN0010388, FBGN0039494
		GOTERM_BP_DIRECT	GO:0009950~dorsal/ventral axis specification	7	0.46729	0.0532512	1093	28	10996	2.5151	1	1	0.992375	FBGN0004003, FBGN0003882, FBGN0262473, FBGN0010441, FBGN0003495, FBGN0016034, FBGN0028990
		GOTERM_BP_DIRECT	GO:0007526~larval somatic muscle development	7	0.46729	0.395836	1093	51	10996	1.38084	1	1	0.992375	FBGN0003882, FBGN0262473, FBGN0010441, FBGN0003495, FBGN0016917, FBGN0053208, FBGN0037617
14	1.64916	SMART	SM00612:Kelch	6	0.400534	0.00201636	549	10	5218	5.70273	0.438567	0.0961133	0.0951052	FBGN0030114, FBGN0034396, FBGN0032485, FBGN0037978, FBGN0030053, FBGN0001301
		INTERPRO	IPR006652:Kelch repeat type 1	7	0.46729	0.00232227	1201	14	10984	4.57286	0.969064	0.144658	0.142723	FBGN0030114, FBGN0034396, FBGN0032485, FBGN0037978, FBGN0030053, FBGN0001301, FBGN0033757
		INTERPRO	IPR015916:Galactose oxidase, beta-propeller	6	0.400534	0.00242677	1201	10	10984	5.48743	0.973548	0.145121	0.14318	FBGN0030114, FBGN0034396, FBGN0032485, FBGN0037978, FBGN0030053, FBGN0001301
		UP_KEYWORDS	Kelch repeat	6	0.400534	0.00730351	1435	13	13921	4.47741	0.884956	0.102597	0.0966846	FBGN0030114, FBGN0034396, FBGN0032485, FBGN0037978, FBGN0030053, FBGN0001301
		INTERPRO	IPR017096:Kelch-like protein, gigaxonin	4	0.267023	0.0201783	1201	6	10984	6.09714	1	0.815313	0.804405	FBGN0030114, FBGN0034396, FBGN0032485, FBGN0037978
		GOTERM_CC_DIRECT	GO:0031463~Cul3-RING ubiquitin ligase complex	6	0.400534	0.0237704	1023	17	10026	3.45903	0.999557	0.546449	0.536235	FBGN0030114, FBGN0034396, FBGN0032485, FBGN0037978, FBGN0044020, FBGN0001301
		PIR_SUPERFAMILY	PIRSF037037:kelch-like protein, gigaxonin type	4	0.267023	0.0447706	120	6	806	4.47778	0.989749	1	1	FBGN0030114, FBGN0034396, FBGN0032485, FBGN0037978
		SMART	SM00225:BTB	13	0.867824	0.058695	549	70	5218	1.76513	1	0.969477	0.959308	FBGN0036980, FBGN0034396, FBGN0032485, FBGN0029824, FBGN0262871, FBGN0001301, FBGN0034706, FBGN0030114, FBGN0005695, FBGN0264493, FBGN0035237, FBGN0037978, FBGN0035107
		SMART	SM00875:SM00875	6	0.400534	0.0859767	549	23	5218	2.47945	1	1	0.992982	FBGN0030114, FBGN0034396, FBGN0032485, FBGN0037978, FBGN0262871, FBGN0001301
		INTERPRO	IPR000210:BTB/POZ-like	13	0.867824	0.104703	1201	74	10984	1.60668	1	1	0.987282	FBGN0036980, FBGN0034396, FBGN0032485, FBGN0029824, FBGN0262871, FBGN0001301, FBGN0034706, FBGN0030114, FBGN0005695, FBGN0264493, FBGN0035237, FBGN0037978, FBGN0035107
		INTERPRO	IPR011705:BTB/Kelch-associated	6	0.400534	0.130034	1201	25	10984	2.19497	1	1	0.987282	FBGN0030114, FBGN0034396, FBGN0032485, FBGN0037978, FBGN0262871, FBGN0001301
		INTERPRO	IPR011333:BTB/POZ fold	14	0.934579	0.132468	1201	85	10984	1.50635	1	1	0.987282	FBGN0036980, FBGN0034396, FBGN0032485, FBGN0029824, FBGN0262871, FBGN0001301, FBGN0034706, FBGN0030114, FBGN0026175, FBGN0005695, FBGN0264493, FBGN0035237, FBGN0037978, FBGN0035107
15	1.58705	GOTERM_MF_DIRECT	GO:0032266~phosphatidylinositol-3-phosphate binding	6	0.400534	0.00361961	990	11	9284	5.11515	0.931915	0.335266	0.333456	FBGN0032935, FBGN0031534, FBGN0035850, FBGN0037648, FBGN0038065, FBGN0052758
		INTERPRO	IPR001683:Phox homologous domain	6	0.400534	0.0240955	1201	16	10984	3.42964	1	0.92366	0.911303	FBGN0031534, FBGN0031457, FBGN0033075, FBGN0004387, FBGN0038065, FBGN0052758
		SMART	SM00312:PX	5	0.333778	0.0299793	549	12	5218	3.96023	0.999834	0.770038	0.76196	FBGN0031534, FBGN0031457, FBGN0033075, FBGN0038065, FBGN0052758
		GOTERM_MF_DIRECT	GO:0035091~phosphatidylinositol binding	6	0.400534	0.171546	990	28	9284	2.00952	1	1	0.995946	FBGN0031534, FBGN0031457, FBGN0033075, FBGN0027574, FBGN0038065, FBGN0052758
16	1.51606	GOTERM_BP_DIRECT	GO:0046668~regulation of retinal cell programmed cell death	5	0.333778	0.000445597	1093	5	10996	10.0604	0.532501	0.063349	0.0628292	FBGN0019972, FBGN0263864, FBGN0027609, FBGN0026404, FBGN0003997
		GOTERM_BP_DIRECT	GO:0012501~programmed cell death	5	0.333778	0.0542547	1093	15	10996	3.35346	1	1	0.992375	FBGN0019972, FBGN0263864, FBGN0040491, FBGN0026404, FBGN0003997
		GOTERM_BP_DIRECT	GO:0045476~nurse cell apoptotic process	5	0.333778	0.0668536	1093	16	10996	3.14387	1	1	0.992375	FBGN0260945, FBGN0019972, FBGN0029093, FBGN0026404, FBGN0003997
		GOTERM_BP_DIRECT	GO:0035070~salivary gland histolysis	4	0.267023	0.0879979	1093	11	10996	3.65832	1	1	0.992375	FBGN0019972, FBGN0263864, FBGN0266084, FBGN0026404
		GOTERM_BP_DIRECT	GO:0046672~positive regulation of compound eye retinal cell programmed cell death	3	0.200267	0.1848	1093	8	10996	3.77264	1	1	0.992375	FBGN0019972, FBGN0263864, FBGN0026404
17	1.48839	GOTERM_MF_DIRECT	GO:0016298~lipase activity	10	0.667557	0.00307292	990	30	9284	3.12593	0.897771	0.325291	0.323535	FBGN0031735, FBGN0039476, FBGN0029831, FBGN0039475, FBGN0039474, FBGN0264979, FBGN0030828, FBGN0039473, FBGN0033999, FBGN0031976
		GOTERM_BP_DIRECT	GO:0016042~lipid catabolic process	12	0.801068	0.0135733	1093	53	10996	2.27782	1	0.526275	0.521956	FBGN0039476, FBGN0029831, FBGN0039475, FBGN0039474, FBGN0264979, FBGN0023495, FBGN0016031, FBGN0030828, FBGN0039473, FBGN0033799, FBGN0033999, FBGN0031976
		INTERPRO	IPR002334:Dol/Ves 1 allergen	4	0.267023	0.0324769	1201	7	10984	5.22612	1	1	0.987282	FBGN0039476, FBGN0039475, FBGN0039474, FBGN0039473
		INTERPRO	IPR000734:Lipase	8	0.534045	0.0619359	1201	33	10984	2.21714	1	1	0.987282	FBGN0039476, FBGN0029831, FBGN0039475, FBGN0039474, FBGN0264979, FBGN0030828, FBGN0039473, FBGN0031976
		INTERPRO	IPR013818:Lipase, N-terminal	8	0.534045	0.0619359	1201	33	10984	2.21714	1	1	0.987282	FBGN0039476, FBGN0029831, FBGN0039475, FBGN0039474, FBGN0264979, FBGN0030828, FBGN0039473, FBGN0031976
		GOTERM_MF_DIRECT	GO:0008970~phosphatidylcholine 1-acylhydrolase activity	4	0.267023	0.0620022	990	9	9284	4.1679	1	1	0.995946	FBGN0039476, FBGN0039475, FBGN0039474, FBGN0039473
		GOTERM_MF_DIRECT	GO:0052739~phosphatidylserine 1-acylhydrolase activity	4	0.267023	0.0620022	990	9	9284	4.1679	1	1	0.995946	FBGN0039476, FBGN0039475, FBGN0039474, FBGN0039473
		GOTERM_MF_DIRECT	GO:0052740~1-acyl-2-lysophosphatidylserine acylhydrolase activity	4	0.267023	0.0620022	990	9	9284	4.1679	1	1	0.995946	FBGN0039476, FBGN0039475, FBGN0039474, FBGN0039473
18	1.47381	GOTERM_MF_DIRECT	GO:0004867~serine-type endopeptidase inhibitor activity	19	1.26836	0.00181719	990	81	9284	2.19973	0.740179	0.224423	0.223211	FBGN0039795, FBGN0263109, FBGN0261630, FBGN0063923, FBGN0031560, FBGN0028988, FBGN0002930, FBGN0031558, FBGN0028984, FBGN0024294, FBGN0026721, FBGN0033355, FBGN0259950, FBGN0028990, FBGN0033710, FBGN0031973, FBGN0051777, FBGN0051778, FBGN0031559
		SMART	SM00093:SERPIN	8	0.534045	0.0323093	549	30	5218	2.53455	0.999917	0.770038	0.76196	FBGN0039795, FBGN0028984, FBGN0024294, FBGN0263109, FBGN0028990, FBGN0031973, FBGN0028988, FBGN0002930
		INTERPRO	IPR000215:Serpin family	8	0.534045	0.0392401	1201	30	10984	2.43886	1	1	0.987282	FBGN0039795, FBGN0028984, FBGN0024294, FBGN0263109, FBGN0028990, FBGN0031973, FBGN0028988, FBGN0002930
		INTERPRO	IPR023796:Serpin domain	8	0.534045	0.0392401	1201	30	10984	2.43886	1	1	0.987282	FBGN0039795, FBGN0028984, FBGN0024294, FBGN0263109, FBGN0028990, FBGN0031973, FBGN0028988, FBGN0002930
		GOTERM_BP_DIRECT	GO:0045861~negative regulation of proteolysis	6	0.400534	0.0506892	1093	21	10996	2.8744	1	1	0.992375	FBGN0004644, FBGN0028984, FBGN0024294, FBGN0028990, FBGN0031973, FBGN0028988
		INTERPRO	IPR023795:Protease inhibitor I4, serpin, conserved site	4	0.267023	0.313375	1201	18	10984	2.03238	1	1	0.987282	FBGN0028984, FBGN0263109, FBGN0028990, FBGN0002930
19	1.4584	INTERPRO	IPR001436:Alpha crystallin/Heat shock protein	6	0.400534	0.0013329	1201	9	10984	6.09714	0.863853	0.104878	0.103475	FBGN0011296, FBGN0001229, FBGN0001225, FBGN0001224, FBGN0001227, FBGN0001226
		INTERPRO	IPR002068:Alpha crystallin/Hsp20 domain	6	0.400534	0.00936698	1201	13	10984	4.2211	0.999999	0.45173	0.445687	FBGN0011296, FBGN0001229, FBGN0001225, FBGN0001224, FBGN0001227, FBGN0001226
		GOTERM_BP_DIRECT	GO:0061077~chaperone-mediated protein folding	5	0.333778	0.0542547	1093	15	10996	3.35346	1	1	0.992375	FBGN0010470, FBGN0029174, FBGN0001225, FBGN0001224, FBGN0001226
		GOTERM_BP_DIRECT	GO:0042026~protein refolding	4	0.267023	0.0689198	1093	10	10996	4.02415	1	1	0.992375	FBGN0011296, FBGN0001225, FBGN0001224, FBGN0001226
		INTERPRO	IPR008978:HSP20-like chaperone	6	0.400534	0.0842253	1201	22	10984	2.49429	1	1	0.987282	FBGN0011296, FBGN0001229, FBGN0001225, FBGN0001224, FBGN0001227, FBGN0001226
		UP_KEYWORDS	Stress response	7	0.46729	0.117836	1435	33	13921	2.0578	1	0.844285	0.795631	FBGN0001230, FBGN0011296, FBGN0001229, FBGN0001225, FBGN0001224, FBGN0001227, FBGN0001226
		GOTERM_BP_DIRECT	GO:0009408~response to heat	11	0.734312	0.133436	1093	68	10996	1.62742	1	1	0.992375	FBGN0060296, FBGN0034707, FBGN0023000, FBGN0011296, FBGN0001229, FBGN0028396, FBGN0019949, FBGN0001225, FBGN0001224, FBGN0001227, FBGN0001226
20	1.44113	GOTERM_MF_DIRECT	GO:0004867~serine-type endopeptidase inhibitor activity	19	1.26836	0.00181719	990	81	9284	2.19973	0.740179	0.224423	0.223211	FBGN0039795, FBGN0263109, FBGN0261630, FBGN0063923, FBGN0031560, FBGN0028988, FBGN0002930, FBGN0031558, FBGN0028984, FBGN0024294, FBGN0026721, FBGN0033355, FBGN0259950, FBGN0028990, FBGN0033710, FBGN0031973, FBGN0051777, FBGN0051778, FBGN0031559
		INTERPRO	IPR002223:Proteinase inhibitor I2, Kunitz metazoa	10	0.667557	0.0514884	1201	45	10984	2.03238	1	1	0.987282	FBGN0031558, FBGN0026721, FBGN0261630, FBGN0033355, FBGN0031560, FBGN0259950, FBGN0033710, FBGN0051777, FBGN0051778, FBGN0031559
		SMART	SM00131:KU	7	0.46729	0.125804	549	33	5218	2.01612	1	1	0.992982	FBGN0031558, FBGN0026721, FBGN0261630, FBGN0033355, FBGN0031560, FBGN0033710, FBGN0031559
		INTERPRO	IPR020901:Proteinase inhibitor I2, Kunitz, conserved site	5	0.333778	0.146114	1201	19	10984	2.40677	1	1	0.987282	FBGN0031558, FBGN0026721, FBGN0033355, FBGN0031560, FBGN0031559
21	1.42417	GOTERM_CC_DIRECT	GO:0016593~Cdc73/Paf1 complex	5	0.333778	0.0272374	1023	12	10026	4.08358	0.999859	0.546449	0.536235	FBGN0019637, FBGN0038773, FBGN0034829, FBGN0031388, FBGN0033865
		GOTERM_BP_DIRECT	GO:0016570~histone modification	5	0.333778	0.0430672	1093	14	10996	3.59299	1	1	0.992375	FBGN0019637, FBGN0038773, FBGN0034829, FBGN0031388, FBGN0033865
		GOTERM_BP_DIRECT	GO:0006368~transcription elongation from RNA polymerase II promoter	7	0.46729	0.0455162	1093	27	10996	2.60825	1	1	0.992375	FBGN0019637, FBGN0038773, FBGN0031388, FBGN0036531, FBGN0019949, FBGN0033865, FBGN0063670
22	1.39007	GOTERM_BP_DIRECT	GO:0009992~cellular water homeostasis	5	0.333778	0.00487959	1093	8	10996	6.28774	0.999762	0.301319	0.298846	FBGN0015872, FBGN0034885, FBGN0034884, FBGN0040238, FBGN0033635
		GOTERM_MF_DIRECT	GO:0015254~glycerol channel activity	4	0.267023	0.0303619	990	7	9284	5.35873	1	0.97572	0.970453	FBGN0015872, FBGN0034885, FBGN0034884, FBGN0033635
		INTERPRO	IPR000425:Major intrinsic protein	4	0.267023	0.0324769	1201	7	10984	5.22612	1	1	0.987282	FBGN0015872, FBGN0034885, FBGN0034884, FBGN0033635
		GOTERM_BP_DIRECT	GO:0034220~ion transmembrane transport	4	0.267023	0.0373513	1093	8	10996	5.03019	1	0.885018	0.877755	FBGN0015872, FBGN0034885, FBGN0034884, FBGN0033635
		GOTERM_MF_DIRECT	GO:0015250~water channel activity	4	0.267023	0.0447989	990	8	9284	4.68889	1	1	0.995946	FBGN0015872, FBGN0034885, FBGN0034884, FBGN0033635
		INTERPRO	IPR023271:Aquaporin-like	4	0.267023	0.0478173	1201	8	10984	4.57286	1	1	0.987282	FBGN0015872, FBGN0034885, FBGN0034884, FBGN0033635
		INTERPRO	IPR022357:Major intrinsic protein, conserved site	3	0.200267	0.0953112	1201	5	10984	5.48743	1	1	0.987282	FBGN0015872, FBGN0034885, FBGN0034884
		GOTERM_MF_DIRECT	GO:0015267~channel activity	3	0.200267	0.206478	990	8	9284	3.51667	1	1	0.995946	FBGN0034885, FBGN0034884, FBGN0033635
23	1.37749	UP_KEYWORDS	Basement membrane	4	0.267023	0.0171752	1435	6	13921	6.46736	0.993968	0.202666	0.190987	FBGN0000299, FBGN0261800, FBGN0001114, FBGN0267348
		UP_KEYWORDS	Extracellular matrix	7	0.46729	0.0207429	1435	22	13921	3.0867	0.997937	0.226636	0.213575	FBGN0000719, FBGN0000299, FBGN0261800, FBGN0016075, FBGN0003390, FBGN0001114, FBGN0267348
		KEGG_PATHWAY	dme04512:ECM-receptor interaction	5	0.333778	0.0279023	311	11	2737	4.00029	0.954251	0.160071	0.136574	FBGN0000299, FBGN0261800, FBGN0029896, FBGN0016075, FBGN0267348
		GOTERM_CC_DIRECT	GO:0005604~basement membrane	3	0.200267	0.310893	1023	11	10026	2.67289	1	1	0.984375	FBGN0261800, FBGN0001114, FBGN0267348
24	1.37202	INTERPRO	IPR013525:ABC-2 type transporter	8	0.534045	0.000531662	1201	15	10984	4.87771	0.54844	0.0567739	0.0560144	FBGN0025683, FBGN0264494, FBGN0000241, FBGN0031220, FBGN0020762, FBGN0052091, FBGN0020445, FBGN0031515
		GOTERM_MF_DIRECT	GO:0017127~cholesterol transporter activity	5	0.333778	0.00630027	990	8	9284	5.86111	0.990751	0.389042	0.386942	FBGN0264494, FBGN0031220, FBGN0020762, FBGN0052091, FBGN0031515
		GOTERM_MF_DIRECT	GO:0034041~sterol-transporting ATPase activity	5	0.333778	0.00630027	990	8	9284	5.86111	0.990751	0.389042	0.386942	FBGN0264494, FBGN0031220, FBGN0020762, FBGN0052091, FBGN0031515
		INTERPRO	IPR017871:ABC transporter, conserved site	12	0.801068	0.0108501	1201	47	10984	2.33508	1	0.506905	0.500124	FBGN0025683, FBGN0264494, FBGN0000241, FBGN0053970, FBGN0028675, FBGN0031220, FBGN0036888, FBGN0032026, FBGN0020762, FBGN0052091, FBGN0020445, FBGN0028539
		INTERPRO	IPR003439:ABC transporter-like	13	0.867824	0.0161346	1201	56	10984	2.12311	1	0.689176	0.679956	FBGN0031220, FBGN0020762, FBGN0052091, FBGN0020445, FBGN0028539, FBGN0025683, FBGN0264494, FBGN0000241, FBGN0053970, FBGN0028675, FBGN0036888, FBGN0032026, FBGN0031515
		SMART	SM00382:AAA	15	1.00134	0.417001	549	123	5218	1.15909	1	1	0.992982	FBGN0037742, FBGN0031220, FBGN0020762, FBGN0052091, FBGN0020445, FBGN0028539, FBGN0025683, FBGN0264494, FBGN0000241, FBGN0053970, FBGN0028675, FBGN0036888, FBGN0032026, FBGN0036568, FBGN0031515
		INTERPRO	IPR003593:AAA+ ATPase domain	15	1.00134	0.477902	1201	123	10984	1.11533	1	1	0.987282	FBGN0037742, FBGN0031220, FBGN0020762, FBGN0052091, FBGN0020445, FBGN0028539, FBGN0025683, FBGN0264494, FBGN0000241, FBGN0053970, FBGN0028675, FBGN0036888, FBGN0032026, FBGN0036568, FBGN0031515
		GOTERM_MF_DIRECT	GO:0042626~ATPase activity, coupled to transmembrane movement of substances	5	0.333778	0.686357	990	43	9284	1.09044	1	1	0.995946	FBGN0000241, FBGN0028675, FBGN0032026, FBGN0020445, FBGN0028539
		GOTERM_MF_DIRECT	GO:0016887~ATPase activity	13	0.867824	0.8876	990	150	9284	0.812741	1	1	0.995946	FBGN0037742, FBGN0031220, FBGN0020762, FBGN0052091, FBGN0020445, FBGN0028539, FBGN0025683, FBGN0264494, FBGN0000241, FBGN0004387, FBGN0053970, FBGN0036888, FBGN0031515
25	1.36979	GOTERM_MF_DIRECT	GO:0009055~electron carrier activity	13	0.867824	0.0052582	990	50	9284	2.43822	0.979891	0.389042	0.386942	FBGN0039697, FBGN0013772, FBGN0001977, FBGN0000449, FBGN0003308, FBGN0029924, FBGN0031824, FBGN0027572, FBGN0037999, FBGN0035811, FBGN0035529, FBGN0051559, FBGN0013678
		GOTERM_BP_DIRECT	GO:0006635~fatty acid beta-oxidation	9	0.600801	0.00592145	1093	29	10996	3.12219	0.99996	0.336733	0.33397	FBGN0027572, FBGN0038326, FBGN0033761, FBGN0037999, FBGN0033465, FBGN0035811, FBGN0029924, FBGN0033879, FBGN0029969
		KEGG_PATHWAY	dme00410:beta-Alanine metabolism	7	0.46729	0.011429	311	18	2737	3.42247	0.714335	0.103814	0.0885749	FBGN0036927, FBGN0038326, FBGN0035811, FBGN0037513, FBGN0051075, FBGN0036857, FBGN0033879
		KEGG_PATHWAY	dme00380:Tryptophan metabolism	7	0.46729	0.0151513	311	19	2737	3.24234	0.810645	0.112297	0.0958128	FBGN0031824, FBGN0000261, FBGN0051075, FBGN0000422, FBGN0036857, FBGN0033879, FBGN0029969
		KEGG_PATHWAY	dme00071:Fatty acid degradation	9	0.600801	0.0154537	311	30	2737	2.64019	0.816878	0.112297	0.0958128	FBGN0031824, FBGN0027572, FBGN0037999, FBGN0035811, FBGN0051075, FBGN0029924, FBGN0036857, FBGN0033879, FBGN0029969
		UP_KEYWORDS	FAD	13	0.867824	0.0178621	1435	60	13921	2.10189	0.995092	0.202666	0.190987	FBGN0003308, FBGN0029924, FBGN0031824, FBGN0030598, FBGN0001112, FBGN0027572, FBGN0030586, FBGN0030594, FBGN0037999, FBGN0033465, FBGN0011676, FBGN0035811, FBGN0053208
		KEGG_PATHWAY	dme00280:Valine, leucine and isoleucine degradation	9	0.600801	0.0188407	311	31	2737	2.55503	0.874221	0.128352	0.109511	FBGN0036927, FBGN0038326, FBGN0033761, FBGN0037999, FBGN0035811, FBGN0051075, FBGN0036857, FBGN0033879, FBGN0029969
		INTERPRO	IPR013786:Acyl-CoA dehydrogenase/oxidase, N-terminal	5	0.333778	0.0342214	1201	12	10984	3.81071	1	1	0.987282	FBGN0031824, FBGN0027572, FBGN0037999, FBGN0035811, FBGN0029924
		KEGG_PATHWAY	dme00650:Butanoate metabolism	6	0.400534	0.0353947	311	17	2737	3.10611	0.980316	0.183715	0.156748	FBGN0036927, FBGN0037999, FBGN0033203, FBGN0262112, FBGN0033879, FBGN0029969
		INTERPRO	IPR006091:Acyl-CoA oxidase/dehydrogenase, central domain	5	0.333778	0.0452679	1201	13	10984	3.51758	1	1	0.987282	FBGN0031824, FBGN0027572, FBGN0037999, FBGN0035811, FBGN0029924
		UP_KEYWORDS	Flavoprotein	13	0.867824	0.0480001	1435	69	13921	1.82773	1	0.456775	0.430452	FBGN0003308, FBGN0029924, FBGN0031824, FBGN0030598, FBGN0001112, FBGN0027572, FBGN0030586, FBGN0030594, FBGN0037999, FBGN0033465, FBGN0011676, FBGN0035811, FBGN0053208
		GOTERM_MF_DIRECT	GO:0050660~flavin adenine dinucleotide binding	12	0.801068	0.0499208	990	60	9284	1.87556	1	1	0.995946	FBGN0031824, FBGN0030598, FBGN0001112, FBGN0027572, FBGN0030597, FBGN0030586, FBGN0030594, FBGN0037999, FBGN0011676, FBGN0035811, FBGN0003308, FBGN0029924
		GOTERM_MF_DIRECT	GO:0003995~acyl-CoA dehydrogenase activity	5	0.333778	0.0536734	990	14	9284	3.34921	1	1	0.995946	FBGN0031824, FBGN0027572, FBGN0037999, FBGN0035811, FBGN0029924
		GOTERM_BP_DIRECT	GO:0033539~fatty acid beta-oxidation using acyl-CoA dehydrogenase	5	0.333778	0.0542547	1093	15	10996	3.35346	1	1	0.992375	FBGN0031824, FBGN0027572, FBGN0037999, FBGN0035811, FBGN0029924
		INTERPRO	IPR009075:Acyl-CoA dehydrogenase/oxidase C-terminal	5	0.333778	0.0580628	1201	14	10984	3.26633	1	1	0.987282	FBGN0031824, FBGN0027572, FBGN0037999, FBGN0035811, FBGN0029924
		INTERPRO	IPR009100:Acyl-CoA dehydrogenase/oxidase	5	0.333778	0.0580628	1201	14	10984	3.26633	1	1	0.987282	FBGN0031824, FBGN0027572, FBGN0037999, FBGN0035811, FBGN0029924
		KEGG_PATHWAY	dme00640:Propanoate metabolism	5	0.333778	0.117329	311	17	2737	2.58842	0.999999	0.426294	0.363719	FBGN0036927, FBGN0038326, FBGN0035811, FBGN0033879, FBGN0029969
		GOTERM_MF_DIRECT	GO:0000062~fatty-acyl-CoA binding	6	0.400534	0.12	990	25	9284	2.25067	1	1	0.995946	FBGN0031824, FBGN0027572, FBGN0037999, FBGN0031992, FBGN0035811, FBGN0029924
		KEGG_PATHWAY	dme00310:Lysine degradation	7	0.46729	0.146111	311	32	2737	1.92514	1	0.468416	0.399658	FBGN0031824, FBGN0025687, FBGN0036147, FBGN0051075, FBGN0036857, FBGN0033879, FBGN0029969
		GOTERM_MF_DIRECT	GO:0052890~oxidoreductase activity, acting on the CH-CH group of donors, with a flavin as acceptor	4	0.267023	0.153835	990	13	9284	2.88547	1	1	0.995946	FBGN0031824, FBGN0027572, FBGN0035811, FBGN0029924
		GOTERM_BP_DIRECT	GO:0055088~lipid homeostasis	6	0.400534	0.189169	1093	31	10996	1.94717	1	1	0.992375	FBGN0031824, FBGN0027572, FBGN0037999, FBGN0035811, FBGN0029924, FBGN0260004
		KEGG_PATHWAY	dme01212:Fatty acid metabolism	7	0.46729	0.338133	311	42	2737	1.46677	1	0.740508	0.63181	FBGN0027572, FBGN0037999, FBGN0035811, FBGN0032358, FBGN0029924, FBGN0033879, FBGN0029969
26	1.36137	INTERPRO	IPR013780:Glycosyl hydrolase, family 13, all-beta	8	0.534045	0.00131974	1201	17	10984	4.30386	0.861145	0.104878	0.103475	FBGN0032192, FBGN0000079, FBGN0027611, FBGN0000078, FBGN0020506, FBGN0032253, FBGN0034117, FBGN0011740
		UP_SEQ_FEATURE	metal ion-binding site:Calcium; via carbonyl oxygen	4	0.267023	0.0031352	296	4	3113	10.5169	0.916578	0.620771	0.620771	FBGN0011828, FBGN0000079, FBGN0000078, FBGN0020506
		UP_SEQ_FEATURE	metal ion-binding site:Calcium	4	0.267023	0.00728872	296	5	3113	8.41351	0.996931	1	1	FBGN0011828, FBGN0000079, FBGN0000078, FBGN0020506
		SMART	SM00632:Aamy_C	3	0.200267	0.0307289	549	3	5218	9.50455	0.999867	0.770038	0.76196	FBGN0000079, FBGN0000078, FBGN0020506
		GOTERM_MF_DIRECT	GO:0004556~alpha-amylase activity	3	0.200267	0.0316023	990	3	9284	9.37778	1	0.97572	0.970453	FBGN0000079, FBGN0000078, FBGN0020506
		INTERPRO	IPR006046:Alpha amylase	3	0.200267	0.0331779	1201	3	10984	9.14571	1	1	0.987282	FBGN0000079, FBGN0000078, FBGN0020506
		UP_SEQ_FEATURE	binding site:Chloride	3	0.200267	0.0472079	296	4	3113	7.88767	1	1	1	FBGN0000079, FBGN0000078, FBGN0020506
		SMART	SM00642:Aamy	5	0.333778	0.0512366	549	14	5218	3.39448	1	0.969477	0.959308	FBGN0000079, FBGN0000078, FBGN0032382, FBGN0020506, FBGN0050359
		INTERPRO	IPR006048:Alpha-amylase, C-terminal all beta	3	0.200267	0.061577	1201	4	10984	6.85928	1	1	0.987282	FBGN0000079, FBGN0000078, FBGN0020506
		INTERPRO	IPR006047:Glycosyl hydrolase, family 13, catalytic domain	5	0.333778	0.0725717	1201	15	10984	3.04857	1	1	0.987282	FBGN0000079, FBGN0000078, FBGN0032382, FBGN0020506, FBGN0050359
		INTERPRO	IPR015902:Glycoside hydrolase, family 13	5	0.333778	0.0725717	1201	15	10984	3.04857	1	1	0.987282	FBGN0000079, FBGN0000078, FBGN0032382, FBGN0020506, FBGN0050359
		GOTERM_MF_DIRECT	GO:0043169~cation binding	4	0.267023	0.0817692	990	10	9284	3.75111	1	1	0.995946	FBGN0000079, FBGN0000078, FBGN0020506, FBGN0035425
		UP_SEQ_FEATURE	active site:Proton donor	7	0.46729	0.0963771	296	34	3113	2.16524	1	1	1	FBGN0000079, FBGN0000078, FBGN0020506, FBGN0265959, FBGN0000053, FBGN0022702, FBGN0250907
		KEGG_PATHWAY	dme00500:Starch and sucrose metabolism	7	0.46729	0.130375	311	31	2737	1.98724	1	0.444088	0.378901	FBGN0000079, FBGN0000078, FBGN0032382, FBGN0020506, FBGN0003076, FBGN0031908, FBGN0003748
		UP_KEYWORDS	Chloride	4	0.267023	0.142922	1435	13	13921	2.98494	1	0.922315	0.869165	FBGN0000079, FBGN0000078, FBGN0020506, FBGN0033755
		UP_SEQ_FEATURE	active site:Nucleophile	6	0.400534	0.233082	296	35	3113	1.8029	1	1	1	FBGN0000079, FBGN0000078, FBGN0030653, FBGN0020506, FBGN0011740, FBGN0032358
		UP_KEYWORDS	Pyrrolidone carboxylic acid	3	0.200267	0.275569	1435	10	13921	2.91031	1	1	0.945578	FBGN0000079, FBGN0000078, FBGN0020506
27	1.35801	GOTERM_MF_DIRECT	GO:0005484~SNAP receptor activity	8	0.534045	0.0131063	990	25	9284	3.00089	0.999943	0.586053	0.58289	FBGN0036341, FBGN0266186, FBGN0035540, FBGN0024980, FBGN0044871, FBGN0267849, FBGN0266720, FBGN0034913
		GOTERM_MF_DIRECT	GO:0000149~SNARE binding	9	0.600801	0.0136503	990	31	9284	2.72258	0.999962	0.586053	0.58289	FBGN0036341, FBGN0266186, FBGN0035540, FBGN0004242, FBGN0024980, FBGN0044871, FBGN0267849, FBGN0032499, FBGN0034913
		SMART	SM00397:t_SNARE	6	0.400534	0.0153986	549	15	5218	3.80182	0.988183	0.489333	0.4842	FBGN0036341, FBGN0035540, FBGN0024980, FBGN0267849, FBGN0266720, FBGN0034913
		GOTERM_BP_DIRECT	GO:0097352~autophagosome maturation	7	0.46729	0.0217906	1093	23	10996	3.06186	1	0.63008	0.624909	FBGN0261241, FBGN0266186, FBGN0032230, FBGN0035540, FBGN0032499, FBGN0038593, FBGN0034913
		INTERPRO	IPR000727:Target SNARE coiled-coil domain	6	0.400534	0.0240955	1201	16	10984	3.42964	1	0.92366	0.911303	FBGN0036341, FBGN0035540, FBGN0024980, FBGN0267849, FBGN0266720, FBGN0034913
		GOTERM_CC_DIRECT	GO:0098793~presynapse	12	0.801068	0.0270975	1023	57	10026	2.06328	0.999852	0.546449	0.536235	FBGN0266674, FBGN0036341, FBGN0031937, FBGN0027363, FBGN0035540, FBGN0031939, FBGN0023000, FBGN0024980, FBGN0039269, FBGN0267849, FBGN0266720, FBGN0034913
		GOTERM_CC_DIRECT	GO:0031201~SNARE complex	8	0.534045	0.0597541	1023	35	10026	2.24013	1	0.871867	0.85557	FBGN0036341, FBGN0266186, FBGN0035540, FBGN0024980, FBGN0044871, FBGN0267849, FBGN0266720, FBGN0034913
		INTERPRO	IPR006011:Syntaxin, N-terminal	3	0.200267	0.061577	1201	4	10984	6.85928	1	1	0.987282	FBGN0036341, FBGN0024980, FBGN0267849
		GOTERM_BP_DIRECT	GO:0048278~vesicle docking	4	0.267023	0.0689198	1093	10	10996	4.02415	1	1	0.992375	FBGN0036341, FBGN0035540, FBGN0024980, FBGN0267849
		GOTERM_BP_DIRECT	GO:0006906~vesicle fusion	6	0.400534	0.0828823	1093	24	10996	2.5151	1	1	0.992375	FBGN0036341, FBGN0266186, FBGN0035540, FBGN0024980, FBGN0044871, FBGN0267849
		INTERPRO	IPR010989:t-SNARE	4	0.267023	0.0869152	1201	10	10984	3.65828	1	1	0.987282	FBGN0036341, FBGN0035540, FBGN0024980, FBGN0267849
		GOTERM_BP_DIRECT	GO:0016081~synaptic vesicle docking	5	0.333778	0.168721	1093	22	10996	2.28645	1	1	0.992375	FBGN0266674, FBGN0036341, FBGN0035540, FBGN0024980, FBGN0267849
		KEGG_PATHWAY	dme04130:SNARE interactions in vesicular transport	5	0.333778	0.183546	311	20	2737	2.20016	1	0.512988	0.437687	FBGN0266186, FBGN0035540, FBGN0044871, FBGN0267849, FBGN0034913

## Sheet: (B)Annotation_cluster_LYD_high
(C) List of functional annotation clusters that significantly enriched (enrichment score ≥ 1.3) in genes highly expressed on LYD rather than on HYD
Annotation Cluster	Enrichment Score	Category	Term	Count	%	PValue	List Total	Pop Hits	Pop Total	Fold Enrichment	Bonferroni	Benjamini	FDR	Genes
1	6.2184	GOTERM_CC_DIRECT	GO:0016021~integral component of membrane	472	20.0937	3.84143e-23	1161	2814	10026	1.44848	1.16011e-20	1.16011e-20	1.13322e-20	FBGN0040510, FBGN0037100, FBGN0040996, FBGN0035043, FBGN0039525, FBGN0039645, FBGN0085423, FBGN0038797, FBGN0085425, FBGN0035282, FBGN0267326, FBGN0027539, FBGN0046294, FBGN0025595, FBGN0052986, FBGN0051415, FBGN0052988, FBGN0260942, FBGN0038568, FBGN0085434, FBGN0026315, FBGN0026439, FBGN0051644, FBGN0050432, FBGN0038209, FBGN0038448, FBGN0030603, FBGN0037485, FBGN0037486, FBGN0036153, FBGN00384…
		UP_KEYWORDS	Transmembrane	488	20.7748	0.129105	2174	2990	13921	1.0451	1	1	1	FBGN0040510, FBGN0037100, FBGN0040996, FBGN0035043, FBGN0039525, FBGN0039645, FBGN0085423, FBGN0040871, FBGN0038797, FBGN0085425, FBGN0035282, FBGN0267326, FBGN0027539, FBGN0046294, FBGN0025595, FBGN0052986, FBGN0051415, FBGN0052988, FBGN0260942, FBGN0038568, FBGN0085434, FBGN0026315, FBGN0027527, FBGN0026439, FBGN0051644, FBGN0050432, FBGN0038209, FBGN0038448, FBGN0030603, FBGN0037485, FBGN00374…
		UP_KEYWORDS	Transmembrane helix	486	20.6897	0.152248	2174	2985	13921	1.04256	1	1	1	FBGN0040510, FBGN0037100, FBGN0040996, FBGN0035043, FBGN0039525, FBGN0039645, FBGN0085423, FBGN0040871, FBGN0038797, FBGN0085425, FBGN0035282, FBGN0267326, FBGN0027539, FBGN0046294, FBGN0025595, FBGN0052986, FBGN0051415, FBGN0052988, FBGN0260942, FBGN0038568, FBGN0085434, FBGN0026315, FBGN0027527, FBGN0026439, FBGN0051644, FBGN0050432, FBGN0038209, FBGN0038448, FBGN0030603, FBGN0037485, FBGN00374…
		UP_KEYWORDS	Membrane	528	22.4777	0.177179	2174	3266	13921	1.03521	1	1	1	FBGN0040510, FBGN0037100, FBGN0040996, FBGN0035043, FBGN0039525, FBGN0039645, FBGN0085423, FBGN0040871, FBGN0038797, FBGN0085425, FBGN0041605, FBGN0035282, FBGN0267326, FBGN0027539, FBGN0046294, FBGN0025595, FBGN0052986, FBGN0051415, FBGN0052988, FBGN0038683, FBGN0260942, FBGN0038568, FBGN0085434, FBGN0026315, FBGN0038680, FBGN0027527, FBGN0026439, FBGN0051644, FBGN0050432, FBGN0038209, FBGN00384…
2	5.94887	KEGG_PATHWAY	dme00010:Glycolysis / Gluconeogenesis	23	0.97914	4.74876e-09	295	53	2737	4.02629	4.84373e-07	2.42187e-07	2.13694e-07	FBGN0034173, FBGN0042711, FBGN0012034, FBGN0011270, FBGN0012036, FBGN0042710, FBGN0037115, FBGN0032372, FBGN0039425, FBGN0038952, FBGN0038258, FBGN0043783, FBGN0031462, FBGN0031451, FBGN0029722, FBGN0052445, FBGN0028540, FBGN0026061, FBGN0036723, FBGN0003074, FBGN0003071, FBGN0033856, FBGN0030525
		KEGG_PATHWAY	dme01130:Biosynthesis of antibiotics	45	1.91571	4.15497e-08	295	180	2737	2.31949	4.23806e-06	1.18004e-06	1.04121e-06	FBGN0034173, FBGN0042711, FBGN0037860, FBGN0011270, FBGN0042710, FBGN0032372, FBGN0039425, FBGN0038952, FBGN0038258, FBGN0043783, FBGN0037862, FBGN0037147, FBGN0031462, FBGN0052026, FBGN0030975, FBGN0052445, FBGN0026565, FBGN0051874, FBGN0039809, FBGN0263782, FBGN0028540, FBGN0029890, FBGN0037988, FBGN0035005, FBGN0042094, FBGN0032061, FBGN0012034, FBGN0036760, FBGN0012036, FBGN0037115, FBGN00362…
		KEGG_PATHWAY	dme01200:Carbon metabolism	33	1.40485	4.62759e-08	295	110	2737	2.78339	4.72013e-06	1.18004e-06	1.04121e-06	FBGN0034173, FBGN0042711, FBGN0037860, FBGN0011270, FBGN0042710, FBGN0039425, FBGN0038952, FBGN0038258, FBGN0037862, FBGN0037147, FBGN0031462, FBGN0052026, FBGN0030975, FBGN0051874, FBGN0029890, FBGN0037988, FBGN0035005, FBGN0032061, FBGN0012034, FBGN0036760, FBGN0037115, FBGN0036222, FBGN0036784, FBGN0031451, FBGN0039071, FBGN0036162, FBGN0029722, FBGN0036723, FBGN0036328, FBGN0003074, FBGN00030…
		GOTERM_BP_DIRECT	GO:0006096~glycolytic process	15	0.63857	1.37075e-07	1186	27	10996	5.15083	0.000167492	4.18766e-05	4.14653e-05	FBGN0034173, FBGN0042711, FBGN0011270, FBGN0042710, FBGN0037115, FBGN0039425, FBGN0038952, FBGN0038258, FBGN0038213, FBGN0031462, FBGN0031451, FBGN0038957, FBGN0036723, FBGN0003074, FBGN0003071
		KEGG_PATHWAY	dme01230:Biosynthesis of amino acids	18	0.766284	0.000215162	295	63	2737	2.65085	0.0217098	0.00365776	0.00322743	FBGN0034173, FBGN0011270, FBGN0037115, FBGN0039425, FBGN0038952, FBGN0038258, FBGN0036663, FBGN0036784, FBGN0037862, FBGN0031462, FBGN0031451, FBGN0039094, FBGN0052026, FBGN0026565, FBGN0036723, FBGN0037988, FBGN0035005, FBGN0003071
		UP_KEYWORDS	Glycolysis	9	0.383142	0.00752591	2174	20	13921	2.88153	0.85542	0.305155	0.305155	FBGN0042711, FBGN0034173, FBGN0011270, FBGN0042710, FBGN0038952, FBGN0038957, FBGN0031462, FBGN0003074, FBGN0003071
3	5.7334	GOTERM_MF_DIRECT	GO:0042623~ATPase activity, coupled	21	0.893997	6.16604e-08	1095	46	9284	3.87064	4.30997e-05	4.31006e-05	4.19907e-05	FBGN0035581, FBGN0085464, FBGN0040299, FBGN0261397, FBGN0001313, FBGN0028858, FBGN0267433, FBGN0028567, FBGN0028569, FBGN0264695, FBGN0267432, FBGN0031410, FBGN0028570, FBGN0013813, FBGN0032972, FBGN0033687, FBGN0026141, FBGN0035009, FBGN0013810, FBGN0063261, FBGN0013811
		GOTERM_BP_DIRECT	GO:0007018~microtubule-based movement	26	1.10685	1.45579e-06	1186	84	10996	2.86975	0.00177739	0.000254139	0.000251643	FBGN0039246, FBGN0035581, FBGN0036499, FBGN0040232, FBGN0028567, FBGN0004379, FBGN0028569, FBGN0013813, FBGN0033687, FBGN0032972, FBGN0026141, FBGN0035009, FBGN0052823, FBGN0013810, FBGN0013811, FBGN0037254, FBGN0036882, FBGN0028858, FBGN0267433, FBGN0034827, FBGN0011606, FBGN0267432, FBGN0028570, FBGN0067861, FBGN0063261, FBGN0034824
		GOTERM_CC_DIRECT	GO:0030286~dynein complex	12	0.510856	7.0256e-05	1161	26	10026	3.98569	0.0209945	0.00707243	0.0069085	FBGN0028567, FBGN0035581, FBGN0028569, FBGN0036499, FBGN0028570, FBGN0032972, FBGN0033687, FBGN0026141, FBGN0001313, FBGN0035009, FBGN0063261, FBGN0028858
4	3.88276	GOTERM_BP_DIRECT	GO:0006030~chitin metabolic process	30	1.27714	3.11593e-07	1186	99	10996	2.80955	0.000380694	7.57547e-05	7.50108e-05	FBGN0040958, FBGN0031000, FBGN0040959, FBGN0052302, FBGN0035607, FBGN0260393, FBGN0040609, FBGN0035325, FBGN0036952, FBGN0036953, FBGN0051439, FBGN0039454, FBGN0039453, FBGN0036361, FBGN0085311, FBGN0036362, FBGN0038645, FBGN0036225, FBGN0036563, FBGN0264488, FBGN0031737, FBGN0036949, FBGN0052656, FBGN0022770, FBGN0036228, FBGN0036229, FBGN0036226, FBGN0036947, FBGN0036948, FBGN0038629
		INTERPRO	IPR002557:Chitin binding domain	31	1.31971	2.13454e-05	1429	106	10984	2.24794	0.0295453	0.00999676	0.0097833	FBGN0040958, FBGN0031000, FBGN0040959, FBGN0052302, FBGN0035607, FBGN0260393, FBGN0040609, FBGN0035325, FBGN0036952, FBGN0036953, FBGN0051439, FBGN0039454, FBGN0039453, FBGN0036361, FBGN0085311, FBGN0036362, FBGN0038645, FBGN0036225, FBGN0036563, FBGN0264488, FBGN0050293, FBGN0031737, FBGN0036949, FBGN0052656, FBGN0022770, FBGN0036228, FBGN0036229, FBGN0036226, FBGN0036947, FBGN0036948, FBGN00386…
		GOTERM_MF_DIRECT	GO:0008061~chitin binding	31	1.31971	6.81223e-05	1095	123	9284	2.13687	0.0465031	0.00952349	0.00927825	FBGN0040958, FBGN0031000, FBGN0040959, FBGN0052302, FBGN0035607, FBGN0260393, FBGN0040609, FBGN0035325, FBGN0036952, FBGN0036953, FBGN0051439, FBGN0039454, FBGN0039453, FBGN0036361, FBGN0085311, FBGN0036362, FBGN0038645, FBGN0036225, FBGN0036563, FBGN0264488, FBGN0050293, FBGN0031737, FBGN0036949, FBGN0052656, FBGN0022770, FBGN0036228, FBGN0036229, FBGN0036226, FBGN0036947, FBGN0036948, FBGN00386…
		SMART	SM00494:ChtBD2	22	0.936569	9.9223e-05	583	79	5218	2.49248	0.0239209	0.0121052	0.0116587	FBGN0036361, FBGN0036362, FBGN0036225, FBGN0031000, FBGN0264488, FBGN0050293, FBGN0052302, FBGN0035607, FBGN0031737, FBGN0036949, FBGN0260393, FBGN0022770, FBGN0035325, FBGN0036228, FBGN0036229, FBGN0036952, FBGN0036226, FBGN0036953, FBGN0036947, FBGN0036948, FBGN0038629, FBGN0051439
		GOTERM_CC_DIRECT	GO:0005576~extracellular region	58	2.46914	0.857851	1161	556	10026	0.900842	1	1	0.980066	FBGN0016123, FBGN0039722, FBGN0020508, FBGN0016122, FBGN0040958, FBGN0031000, FBGN0040959, FBGN0052302, FBGN0035607, FBGN0037906, FBGN0004650, FBGN0054049, FBGN0035325, FBGN0039801, FBGN0031407, FBGN0010294, FBGN0262728, FBGN0039454, FBGN0040322, FBGN0039453, FBGN0085311, FBGN0013323, FBGN0038645, FBGN0036225, FBGN0010295, FBGN0051482, FBGN0031737, FBGN0036949, FBGN0052656, FBGN0051286, FBGN00362…
5	3.75209	UP_SEQ_FEATURE	site:Required for specificity	8	0.34057	9.9582e-07	228	10	3113	10.9228	0.000591343	0.000296257	0.000296257	FBGN0003863, FBGN0015001, FBGN0011556, FBGN0010357, FBGN0011555, FBGN0011554, FBGN0010425, FBGN0010358
		UP_SEQ_FEATURE	propeptide:Activation peptide	8	0.34057	1.17606e-05	228	13	3113	8.40216	0.00696148	0.00233251	0.00233251	FBGN0003863, FBGN0015001, FBGN0011556, FBGN0010357, FBGN0011555, FBGN0011554, FBGN0010425, FBGN0010358
		UP_SEQ_FEATURE	active site:Charge relay system	11	0.468284	9.61797e-05	228	34	3113	4.41731	0.055532	0.0143067	0.0143067	FBGN0038233, FBGN0003863, FBGN0263782, FBGN0014906, FBGN0015001, FBGN0011556, FBGN0010357, FBGN0011555, FBGN0011554, FBGN0010425, FBGN0010358
		UP_SEQ_FEATURE	domain:Peptidase S1	8	0.34057	0.000158734	228	18	3113	6.06823	0.0899859	0.0188893	0.0188893	FBGN0003863, FBGN0015001, FBGN0011556, FBGN0010357, FBGN0011555, FBGN0011554, FBGN0010425, FBGN0010358
		KEGG_PATHWAY	dme04080:Neuroactive ligand-receptor interaction	11	0.468284	0.00277683	295	35	2737	2.91593	0.246955	0.0236864	0.0208998	FBGN0025595, FBGN0003863, FBGN0004168, FBGN0015001, FBGN0031275, FBGN0011556, FBGN0010357, FBGN0011555, FBGN0011554, FBGN0010425, FBGN0010358
		UP_KEYWORDS	Zymogen	11	0.468284	0.0618801	2174	38	13921	1.85362	1	1	1	FBGN0026576, FBGN0038233, FBGN0003863, FBGN0015001, FBGN0011556, FBGN0010357, FBGN0011555, FBGN0011554, FBGN0028381, FBGN0010425, FBGN0010358
6	3.52327	INTERPRO	IPR008283:Peptidase M17, leucyl aminopeptidase, N-terminal	8	0.34057	4.39631e-06	1429	8	10984	7.68649	0.0061578	0.00318157	0.00311364	FBGN0035915, FBGN0034132, FBGN0033860, FBGN0052064, FBGN0052351, FBGN0045770, FBGN0259795, FBGN0033868
		GOTERM_MF_DIRECT	GO:0030145~manganese ion binding	10	0.425713	4.26373e-05	1095	17	9284	4.98738	0.0293644	0.00745087	0.007259	FBGN0039421, FBGN0035915, FBGN0260481, FBGN0034132, FBGN0033860, FBGN0052064, FBGN0052351, FBGN0045770, FBGN0259795, FBGN0033868
		INTERPRO	IPR000819:Peptidase M17, leucyl aminopeptidase, C-terminal	8	0.34057	5.18906e-05	1429	10	10984	6.1492	0.0703138	0.012151	0.0118916	FBGN0035915, FBGN0034132, FBGN0033860, FBGN0052064, FBGN0052351, FBGN0045770, FBGN0259795, FBGN0033868
		INTERPRO	IPR011356:Leucine aminopeptidase/peptidase B	8	0.34057	5.18906e-05	1429	10	10984	6.1492	0.0703138	0.012151	0.0118916	FBGN0035915, FBGN0034132, FBGN0033860, FBGN0052064, FBGN0052351, FBGN0045770, FBGN0259795, FBGN0033868
		UP_KEYWORDS	Aminopeptidase	17	0.723712	0.000173678	2174	40	13921	2.72145	0.0434914	0.0444617	0.0444617	FBGN0038135, FBGN0034132, FBGN0033860, FBGN0052064, FBGN0052351, FBGN0028935, FBGN0035915, FBGN0032969, FBGN0051445, FBGN0260481, FBGN0051198, FBGN0051343, FBGN0051233, FBGN0045770, FBGN0259795, FBGN0259237, FBGN0033868
		GOTERM_MF_DIRECT	GO:0004177~aminopeptidase activity	12	0.510856	0.000266155	1095	29	9284	3.50836	0.169782	0.0265775	0.0258931	FBGN0035915, FBGN0032969, FBGN0260481, FBGN0034132, FBGN0033860, FBGN0051233, FBGN0052064, FBGN0052351, FBGN0045770, FBGN0259795, FBGN0028935, FBGN0033868
		GOTERM_MF_DIRECT	GO:0008235~metalloexopeptidase activity	8	0.34057	0.000501374	1095	14	9284	4.84488	0.295698	0.035046	0.0341436	FBGN0035915, FBGN0034132, FBGN0033860, FBGN0052064, FBGN0052351, FBGN0045770, FBGN0259795, FBGN0033868
		KEGG_PATHWAY	dme00330:Arginine and proline metabolism	12	0.510856	0.00772995	295	46	2737	2.42034	0.546844	0.0563182	0.0496926	FBGN0051014, FBGN0051015, FBGN0035915, FBGN0012036, FBGN0034132, FBGN0052064, FBGN0036403, FBGN0052351, FBGN0039779, FBGN0259795, FBGN0038373, FBGN0035957
		KEGG_PATHWAY	dme00480:Glutathione metabolism	10	0.425713	0.21591	295	62	2737	1.49645	1	0.734095	0.647731	FBGN0035915, FBGN0034132, FBGN0063499, FBGN0051233, FBGN0037147, FBGN0034733, FBGN0052064, FBGN0052351, FBGN0259795, FBGN0011703
7	3.03084	GOTERM_MF_DIRECT	GO:0004035~alkaline phosphatase activity	12	0.510856	8.39701e-07	1095	18	9284	5.65236	0.000586779	0.000293476	0.000285918	FBGN0035619, FBGN0052488, FBGN0036760, FBGN0030347, FBGN0016123, FBGN0030661, FBGN0035620, FBGN0052487, FBGN0038845, FBGN0033423, FBGN0034712, FBGN0032779
		SMART	SM00098:alkPPc	8	0.34057	0.00019453	583	13	5218	5.50785	0.0463608	0.0158218	0.0152382	FBGN0035619, FBGN0016123, FBGN0030661, FBGN0035620, FBGN0038845, FBGN0033423, FBGN0034712, FBGN0032779
		INTERPRO	IPR001952:Alkaline phosphatase	8	0.34057	0.000518969	1429	13	10984	4.73015	0.517773	0.0560885	0.0548909	FBGN0035619, FBGN0016123, FBGN0030661, FBGN0035620, FBGN0038845, FBGN0033423, FBGN0034712, FBGN0032779
		GOTERM_BP_DIRECT	GO:0016311~dephosphorylation	17	0.723712	0.000551871	1186	61	10996	2.58386	0.490626	0.0561989	0.055647	FBGN0037166, FBGN0036760, FBGN0039694, FBGN0016123, FBGN0035620, FBGN0037064, FBGN0035619, FBGN0052488, FBGN0030347, FBGN0030661, FBGN0052487, FBGN0026061, FBGN0033423, FBGN0038845, FBGN0034713, FBGN0034712, FBGN0032779
		KEGG_PATHWAY	dme00790:Folate biosynthesis	10	0.425713	0.000724697	295	25	2737	3.71119	0.0712781	0.00923989	0.00815284	FBGN0035619, FBGN0051773, FBGN0016123, FBGN0030661, FBGN0035620, FBGN0038845, FBGN0030041, FBGN0033423, FBGN0034712, FBGN0032779
		INTERPRO	IPR017850:Alkaline-phosphatase-like, core domain	14	0.595998	0.00301306	1429	44	10984	2.4457	0.985589	0.143064	0.14001	FBGN0038832, FBGN0016123, FBGN0035620, FBGN0052191, FBGN0039010, FBGN0035619, FBGN0030661, FBGN0039518, FBGN0033423, FBGN0038845, FBGN0037915, FBGN0034712, FBGN0032964, FBGN0032779
		INTERPRO	IPR017849:Alkaline phosphatase-like, alpha/beta/alpha	13	0.553427	0.00579799	1429	42	10984	2.37915	0.999717	0.198687	0.194445	FBGN0038832, FBGN0016123, FBGN0035620, FBGN0052191, FBGN0039010, FBGN0035619, FBGN0030661, FBGN0039518, FBGN0033423, FBGN0038845, FBGN0037915, FBGN0034712, FBGN0032779
		GOTERM_CC_DIRECT	GO:0009986~cell surface	17	0.723712	0.0173998	1161	79	10026	1.85831	0.995013	0.354721	0.346499	FBGN0010052, FBGN0016123, FBGN0032131, FBGN0015574, FBGN0035620, FBGN0015570, FBGN0037090, FBGN0035619, FBGN0027584, FBGN0261393, FBGN0030661, FBGN0033423, FBGN0038845, FBGN0015569, FBGN0032116, FBGN0034712, FBGN0032779
		INTERPRO	IPR018299:Alkaline phosphatase, active site	4	0.170285	0.0512067	1429	7	10984	4.39228	1	0.765377	0.749034	FBGN0016123, FBGN0038845, FBGN0033423, FBGN0034712
8	2.90157	GOTERM_MF_DIRECT	GO:0042623~ATPase activity, coupled	21	0.893997	6.16604e-08	1095	46	9284	3.87064	4.30997e-05	4.31006e-05	4.19907e-05	FBGN0035581, FBGN0085464, FBGN0040299, FBGN0261397, FBGN0001313, FBGN0028858, FBGN0267433, FBGN0028567, FBGN0028569, FBGN0264695, FBGN0267432, FBGN0031410, FBGN0028570, FBGN0013813, FBGN0032972, FBGN0033687, FBGN0026141, FBGN0035009, FBGN0013810, FBGN0063261, FBGN0013811
		GOTERM_BP_DIRECT	GO:0003341~cilium movement	14	0.595998	3.71954e-07	1186	25	10996	5.19204	0.000454425	7.57547e-05	7.50108e-05	FBGN0037276, FBGN0035581, FBGN0037962, FBGN0039070, FBGN0263988, FBGN0001313, FBGN0262123, FBGN0267432, FBGN0029993, FBGN0034566, FBGN0032520, FBGN0013813, FBGN0013810, FBGN0013811
		GOTERM_CC_DIRECT	GO:0036156~inner dynein arm	6	0.255428	0.000353168	1161	7	10026	7.40199	0.101183	0.0177761	0.0173641	FBGN0035581, FBGN0037962, FBGN0013813, FBGN0001313, FBGN0013810, FBGN0013811
		INTERPRO	IPR013602:Dynein heavy chain, domain-2	8	0.34057	0.000921824	1429	14	10984	4.39228	0.72631	0.0809476	0.0792192	FBGN0267433, FBGN0037254, FBGN0035581, FBGN0267432, FBGN0013813, FBGN0001313, FBGN0013810, FBGN0013811
		INTERPRO	IPR026983:Dynein heavy chain	8	0.34057	0.000921824	1429	14	10984	4.39228	0.72631	0.0809476	0.0792192	FBGN0267433, FBGN0037254, FBGN0035581, FBGN0267432, FBGN0013813, FBGN0001313, FBGN0013810, FBGN0013811
		INTERPRO	IPR024317:Dynein heavy chain, P-loop containing D4 domain	7	0.297999	0.00362707	1429	13	10984	4.13888	0.993935	0.143064	0.14001	FBGN0267433, FBGN0035581, FBGN0267432, FBGN0013813, FBGN0001313, FBGN0013810, FBGN0013811
		INTERPRO	IPR004273:Dynein heavy chain domain	7	0.297999	0.00362707	1429	13	10984	4.13888	0.993935	0.143064	0.14001	FBGN0267433, FBGN0035581, FBGN0267432, FBGN0013813, FBGN0001313, FBGN0013810, FBGN0013811
		INTERPRO	IPR024743:Dynein heavy chain, coiled coil stalk	7	0.297999	0.00362707	1429	13	10984	4.13888	0.993935	0.143064	0.14001	FBGN0267433, FBGN0035581, FBGN0267432, FBGN0013813, FBGN0001313, FBGN0013810, FBGN0013811
		GOTERM_MF_DIRECT	GO:0008569~ATP-dependent microtubule motor activity, minus-end-directed	6	0.255428	0.0245601	1095	15	9284	3.39142	1	0.403079	0.3927	FBGN0035581, FBGN0267432, FBGN0013813, FBGN0001313, FBGN0013810, FBGN0013811
		COG_ONTOLOGY	Cytoskeleton	7	0.297999	0.0728264	182	21	1239	2.26923	0.879632	0.619305	0.619305	FBGN0035581, FBGN0013813, FBGN0261397, FBGN0001313, FBGN0002789, FBGN0013810, FBGN0013811
		INTERPRO	IPR013594:Dynein heavy chain, domain-1	4	0.170285	0.130694	1429	10	10984	3.0746	1	1	0.979345	FBGN0267433, FBGN0267432, FBGN0013813, FBGN0001313
		INTERPRO	IPR011704:ATPase, dynein-related, AAA domain	4	0.170285	0.197657	1429	12	10984	2.56216	1	1	0.979345	FBGN0267433, FBGN0267432, FBGN0013813, FBGN0001313
9	2.7249	GOTERM_BP_DIRECT	GO:0006096~glycolytic process	15	0.63857	1.37075e-07	1186	27	10996	5.15083	0.000167492	4.18766e-05	4.14653e-05	FBGN0034173, FBGN0042711, FBGN0011270, FBGN0042710, FBGN0037115, FBGN0039425, FBGN0038952, FBGN0038258, FBGN0038213, FBGN0031462, FBGN0031451, FBGN0038957, FBGN0036723, FBGN0003074, FBGN0003071
		GOTERM_MF_DIRECT	GO:0030955~potassium ion binding	9	0.383142	1.16024e-05	1095	12	9284	6.3589	0.00807734	0.00270336	0.00263375	FBGN0037115, FBGN0038952, FBGN0038258, FBGN0039941, FBGN0038213, FBGN0031462, FBGN0036723, FBGN0040031, FBGN0028704
		GOTERM_MF_DIRECT	GO:0004743~pyruvate kinase activity	6	0.255428	0.000385362	1095	7	9284	7.26732	0.236177	0.0299298	0.029159	FBGN0037115, FBGN0038952, FBGN0038258, FBGN0038213, FBGN0031462, FBGN0036723
		INTERPRO	IPR015794:Pyruvate kinase, alpha/beta	5	0.212857	0.00343137	1429	6	10984	6.40541	0.992008	0.143064	0.14001	FBGN0037115, FBGN0038952, FBGN0038258, FBGN0031462, FBGN0036723
		INTERPRO	IPR015795:Pyruvate kinase, C-terminal	5	0.212857	0.00343137	1429	6	10984	6.40541	0.992008	0.143064	0.14001	FBGN0037115, FBGN0038952, FBGN0038258, FBGN0031462, FBGN0036723
		INTERPRO	IPR001697:Pyruvate kinase	5	0.212857	0.00343137	1429	6	10984	6.40541	0.992008	0.143064	0.14001	FBGN0037115, FBGN0038952, FBGN0038258, FBGN0031462, FBGN0036723
		INTERPRO	IPR015793:Pyruvate kinase, barrel	4	0.170285	0.0178856	1429	5	10984	6.1492	1	0.426831	0.417717	FBGN0037115, FBGN0038952, FBGN0038258, FBGN0031462
		INTERPRO	IPR015806:Pyruvate kinase, beta-barrel insert domain	3	0.127714	0.0846566	1429	4	10984	5.76487	1	0.982996	0.962007	FBGN0037115, FBGN0038952, FBGN0031462
		INTERPRO	IPR015813:Pyruvate/Phosphoenolpyruvate kinase-like domain	3	0.127714	0.0846566	1429	4	10984	5.76487	1	0.982996	0.962007	FBGN0038952, FBGN0038258, FBGN0031462
		INTERPRO	IPR011037:Pyruvate kinase-like, insert domain	3	0.127714	0.177586	1429	6	10984	3.84325	1	1	0.979345	FBGN0037115, FBGN0038952, FBGN0031462
10	2.6924	UP_SEQ_FEATURE	metal ion-binding site:Iron (heme axial ligand)	23	0.97914	7.33411e-07	228	96	3113	3.27115	0.000435552	0.000296257	0.000296257	FBGN0033292, FBGN0015037, FBGN0013771, FBGN0015036, FBGN0015033, FBGN0033397, FBGN0015035, FBGN0010383, FBGN0038680, FBGN0038095, FBGN0086907, FBGN0000473, FBGN0023541, FBGN0036910, FBGN0036778, FBGN0005670, FBGN0033982, FBGN0031695, FBGN0033524, FBGN0033304, FBGN0031688, FBGN0030615, FBGN0033978
		GOTERM_MF_DIRECT	GO:0016705~oxidoreductase activity, acting on paired donors, with incorporation or reduction of molecular oxygen	25	1.06428	9.6834e-05	1095	91	9284	2.32927	0.0654501	0.0112812	0.0109907	FBGN0015037, FBGN0013771, FBGN0015036, FBGN0015033, FBGN0015035, FBGN0010383, FBGN0038095, FBGN0000473, FBGN0051015, FBGN0036778, FBGN0036910, FBGN0033982, FBGN0033302, FBGN0033524, FBGN0033304, FBGN0031688, FBGN0030615, FBGN0033292, FBGN0033397, FBGN0038680, FBGN0023541, FBGN0005670, FBGN0031695, FBGN0039779, FBGN0033978
		GOTERM_CC_DIRECT	GO:0031090~organelle membrane	22	0.936569	0.00017915	1161	79	10026	2.40487	0.0526704	0.0119762	0.0116986	FBGN0033292, FBGN0015037, FBGN0013771, FBGN0015036, FBGN0015033, FBGN0033397, FBGN0015035, FBGN0010383, FBGN0038095, FBGN0000473, FBGN0023541, FBGN0036910, FBGN0036778, FBGN0005670, FBGN0033982, FBGN0031695, FBGN0033302, FBGN0033524, FBGN0033304, FBGN0031688, FBGN0030615, FBGN0033978
		GOTERM_CC_DIRECT	GO:0005789~endoplasmic reticulum membrane	45	1.91571	0.000198282	1161	221	10026	1.75839	0.058129	0.0119762	0.0116986	FBGN0015037, FBGN0013771, FBGN0015036, FBGN0015831, FBGN0040336, FBGN0015033, FBGN0035265, FBGN0015035, FBGN0010383, FBGN0261523, FBGN0038095, FBGN0000473, FBGN0030015, FBGN0263782, FBGN0036778, FBGN0036910, FBGN0033982, FBGN0033302, FBGN0033524, FBGN0033304, FBGN0031688, FBGN0030615, FBGN0052703, FBGN0033292, FBGN0039498, FBGN0039756, FBGN0086687, FBGN0033397, FBGN0052670, FBGN0262100, FBGN00360…
		GOTERM_MF_DIRECT	GO:0020037~heme binding	30	1.27714	0.000601896	1095	132	9284	1.92694	0.343513	0.0350605	0.0341576	FBGN0015037, FBGN0013771, FBGN0015036, FBGN0037385, FBGN0015033, FBGN0015035, FBGN0010383, FBGN0038095, FBGN0000473, FBGN0032519, FBGN0031367, FBGN0036778, FBGN0036910, FBGN0033982, FBGN0033302, FBGN0033524, FBGN0033304, FBGN0031688, FBGN0030615, FBGN0033292, FBGN0032061, FBGN0033397, FBGN0031372, FBGN0038680, FBGN0086907, FBGN0023541, FBGN0250846, FBGN0005670, FBGN0031695, FBGN0033978
		INTERPRO	IPR017972:Cytochrome P450, conserved site	22	0.936569	0.001053	1429	80	10984	2.11379	0.772418	0.0870273	0.085169	FBGN0033292, FBGN0015037, FBGN0013771, FBGN0015036, FBGN0015033, FBGN0033397, FBGN0015035, FBGN0010383, FBGN0038680, FBGN0038095, FBGN0000473, FBGN0023541, FBGN0036910, FBGN0005670, FBGN0033982, FBGN0031695, FBGN0033302, FBGN0033524, FBGN0033304, FBGN0031688, FBGN0030615, FBGN0033978
		GOTERM_MF_DIRECT	GO:0004497~monooxygenase activity	22	0.936569	0.00109278	1095	88	9284	2.11963	0.534328	0.047741	0.0465117	FBGN0033292, FBGN0015037, FBGN0013771, FBGN0015036, FBGN0015033, FBGN0033397, FBGN0015035, FBGN0038680, FBGN0038095, FBGN0000473, FBGN0023541, FBGN0036910, FBGN0036778, FBGN0005670, FBGN0033982, FBGN0031695, FBGN0033302, FBGN0033524, FBGN0033304, FBGN0031688, FBGN0030615, FBGN0033978
		INTERPRO	IPR002401:Cytochrome P450, E-class, group I	21	0.893997	0.00157794	1429	77	10984	2.09632	0.891256	0.108377	0.106063	FBGN0033292, FBGN0015037, FBGN0013771, FBGN0015036, FBGN0015033, FBGN0033397, FBGN0015035, FBGN0010383, FBGN0038680, FBGN0038095, FBGN0000473, FBGN0023541, FBGN0036910, FBGN0005670, FBGN0033982, FBGN0031695, FBGN0033302, FBGN0033524, FBGN0033304, FBGN0030615, FBGN0033978
		INTERPRO	IPR001128:Cytochrome P450	23	0.97914	0.00161988	1429	88	10984	2.00897	0.897488	0.108377	0.106063	FBGN0033292, FBGN0015037, FBGN0013771, FBGN0015036, FBGN0015033, FBGN0033397, FBGN0015035, FBGN0010383, FBGN0038680, FBGN0038095, FBGN0000473, FBGN0023541, FBGN0036910, FBGN0036778, FBGN0005670, FBGN0033982, FBGN0031695, FBGN0033302, FBGN0033524, FBGN0033304, FBGN0031688, FBGN0030615, FBGN0033978
		GOTERM_MF_DIRECT	GO:0005506~iron ion binding	31	1.31971	0.00192218	1095	148	9284	1.77591	0.739433	0.070716	0.068895	FBGN0015037, FBGN0013771, FBGN0015036, FBGN0015033, FBGN0015035, FBGN0010383, FBGN0038095, FBGN0000473, FBGN0051014, FBGN0051015, FBGN0036778, FBGN0036910, FBGN0033982, FBGN0033302, FBGN0033524, FBGN0033304, FBGN0031688, FBGN0030615, FBGN0033292, FBGN0039756, FBGN0086687, FBGN0033397, FBGN0036663, FBGN0038680, FBGN0023541, FBGN0005670, FBGN0030509, FBGN0031695, FBGN0039779, FBGN0030449, FBGN00339…
		COG_ONTOLOGY	Secondary metabolites biosynthesis, transport, and catabolism	24	1.02171	0.00375552	182	91	1239	1.79544	0.0999928	0.105155	0.105155	FBGN0033292, FBGN0015037, FBGN0013771, FBGN0015036, FBGN0015033, FBGN0036346, FBGN0033397, FBGN0015035, FBGN0010383, FBGN0038680, FBGN0038095, FBGN0000473, FBGN0023541, FBGN0036910, FBGN0036778, FBGN0005670, FBGN0033982, FBGN0031695, FBGN0033302, FBGN0033524, FBGN0033304, FBGN0031688, FBGN0030615, FBGN0033978
		UP_KEYWORDS	Microsome	22	0.936569	0.00834408	2174	79	13921	1.78323	0.882937	0.305155	0.305155	FBGN0033292, FBGN0015037, FBGN0013771, FBGN0015036, FBGN0015033, FBGN0033397, FBGN0015035, FBGN0010383, FBGN0038095, FBGN0000473, FBGN0023541, FBGN0036910, FBGN0036778, FBGN0005670, FBGN0033982, FBGN0031695, FBGN0033302, FBGN0033524, FBGN0033304, FBGN0031688, FBGN0030615, FBGN0033978
		UP_KEYWORDS	Heme	27	1.14943	0.0330956	2174	116	13921	1.49045	0.999819	0.847246	0.847246	FBGN0015037, FBGN0013771, FBGN0015036, FBGN0037385, FBGN0015033, FBGN0015035, FBGN0010383, FBGN0038095, FBGN0000473, FBGN0036778, FBGN0036910, FBGN0033982, FBGN0033302, FBGN0033524, FBGN0033304, FBGN0031688, FBGN0030615, FBGN0033292, FBGN0032061, FBGN0033397, FBGN0038680, FBGN0086907, FBGN0023541, FBGN0250846, FBGN0005670, FBGN0031695, FBGN0033978
		UP_KEYWORDS	Monooxygenase	24	1.02171	0.0447473	2174	103	13921	1.49206	0.999992	1	1	FBGN0033292, FBGN0015037, FBGN0013771, FBGN0015036, FBGN0015033, FBGN0033397, FBGN0015035, FBGN0010383, FBGN0038680, FBGN0038095, FBGN0000473, FBGN0010329, FBGN0023541, FBGN0036910, FBGN0036778, FBGN0005670, FBGN0033982, FBGN0031695, FBGN0033302, FBGN0033524, FBGN0033304, FBGN0031688, FBGN0030615, FBGN0033978
		UP_KEYWORDS	Iron	32	1.36228	0.411805	2174	189	13921	1.08417	1	1	1	FBGN0015037, FBGN0013771, FBGN0015036, FBGN0037385, FBGN0015033, FBGN0015035, FBGN0010383, FBGN0037862, FBGN0053093, FBGN0038095, FBGN0000473, FBGN0030975, FBGN0036778, FBGN0036910, FBGN0033982, FBGN0033302, FBGN0033524, FBGN0033304, FBGN0031688, FBGN0030615, FBGN0033292, FBGN0032061, FBGN0033397, FBGN0038680, FBGN0086907, FBGN0023541, FBGN0250846, FBGN0005670, FBGN0031695, FBGN0036706, FBGN00304…
		UP_KEYWORDS	Endoplasmic reticulum	30	1.27714	0.508921	2174	184	13921	1.04403	1	1	1	FBGN0015037, FBGN0013771, FBGN0015036, FBGN0015831, FBGN0040336, FBGN0015033, FBGN0035265, FBGN0015035, FBGN0010383, FBGN0038095, FBGN0000473, FBGN0263782, FBGN0263260, FBGN0036778, FBGN0036910, FBGN0033982, FBGN0033302, FBGN0033524, FBGN0033304, FBGN0031688, FBGN0030615, FBGN0033292, FBGN0033397, FBGN0262100, FBGN0029849, FBGN0023541, FBGN0005670, FBGN0031695, FBGN0015623, FBGN0033978
11	2.63185	GOTERM_BP_DIRECT	GO:0006508~proteolysis	95	4.04427	2.26883e-09	1186	475	10996	1.8543	2.77251e-06	1.38626e-06	1.37264e-06	FBGN0085465, FBGN0038479, FBGN0035003, FBGN0016122, FBGN0033860, FBGN0052064, FBGN0028945, FBGN0250815, FBGN0031249, FBGN0031805, FBGN0050289, FBGN0031808, FBGN0031929, FBGN0035886, FBGN0011556, FBGN0011555, FBGN0011554, FBGN0035887, FBGN0011834, FBGN0051019, FBGN0028381, FBGN0010425, FBGN0032536, FBGN0033868, FBGN0036022, FBGN0036023, FBGN0036024, FBGN0035971, FBGN0032144, FBGN0037037, FBGN00384…
		SMART	SM00020:Tryp_SPc	47	2.00085	0.000409561	583	252	5218	1.66929	0.0951204	0.0199866	0.0192494	FBGN0034052, FBGN0085465, FBGN0038479, FBGN0035003, FBGN0030776, FBGN0023197, FBGN0250815, FBGN0050187, FBGN0031249, FBGN0003863, FBGN0030775, FBGN0030774, FBGN0025378, FBGN0050289, FBGN0035886, FBGN0011556, FBGN0035665, FBGN0011555, FBGN0011554, FBGN0036832, FBGN0035887, FBGN0034776, FBGN0011834, FBGN0010425, FBGN0036022, FBGN0036023, FBGN0035670, FBGN0036024, FBGN0039798, FBGN0035971, FBGN00150…
		INTERPRO	IPR001314:Peptidase S1A, chymotrypsin-type	46	1.95828	0.002718	1429	229	10984	1.54401	0.978159	0.143064	0.14001	FBGN0034052, FBGN0038479, FBGN0035003, FBGN0030776, FBGN0023197, FBGN0250815, FBGN0050187, FBGN0031249, FBGN0003863, FBGN0030775, FBGN0030774, FBGN0025378, FBGN0050289, FBGN0035886, FBGN0011556, FBGN0035665, FBGN0011555, FBGN0011554, FBGN0036832, FBGN0035887, FBGN0034776, FBGN0011834, FBGN0010425, FBGN0036022, FBGN0036023, FBGN0035670, FBGN0036024, FBGN0039798, FBGN0035971, FBGN0015001, FBGN02632…
		GOTERM_MF_DIRECT	GO:0004252~serine-type endopeptidase activity	50	2.12857	0.00272815	1095	280	9284	1.51402	0.851858	0.0874272	0.0851759	FBGN0038233, FBGN0085465, FBGN0038479, FBGN0035003, FBGN0250815, FBGN0031249, FBGN0050289, FBGN0035886, FBGN0011556, FBGN0011555, FBGN0011554, FBGN0035887, FBGN0011834, FBGN0010425, FBGN0036022, FBGN0036023, FBGN0036024, FBGN0035971, FBGN0038482, FBGN0029827, FBGN0038481, FBGN0029826, FBGN0030688, FBGN0043471, FBGN0259998, FBGN0034052, FBGN0030776, FBGN0023197, FBGN0003863, FBGN0050187, FBGN00307…
		INTERPRO	IPR009003:Trypsin-like cysteine/serine peptidase domain	48	2.04342	0.0136939	1429	263	10984	1.40286	1	0.384798	0.376582	FBGN0034052, FBGN0038233, FBGN0085465, FBGN0038479, FBGN0035003, FBGN0030776, FBGN0023197, FBGN0250815, FBGN0050187, FBGN0031249, FBGN0003863, FBGN0030775, FBGN0030774, FBGN0025378, FBGN0050289, FBGN0035886, FBGN0011556, FBGN0035665, FBGN0011555, FBGN0011554, FBGN0036832, FBGN0035887, FBGN0034776, FBGN0011834, FBGN0010425, FBGN0036022, FBGN0036023, FBGN0035670, FBGN0036024, FBGN0039798, FBGN00359…
		INTERPRO	IPR001254:Peptidase S1	47	2.00085	0.0142277	1429	257	10984	1.4057	1	0.39196	0.38359	FBGN0034052, FBGN0085465, FBGN0038479, FBGN0035003, FBGN0030776, FBGN0023197, FBGN0250815, FBGN0050187, FBGN0031249, FBGN0003863, FBGN0030775, FBGN0030774, FBGN0025378, FBGN0050289, FBGN0035886, FBGN0011556, FBGN0035665, FBGN0011555, FBGN0011554, FBGN0036832, FBGN0035887, FBGN0034776, FBGN0011834, FBGN0010425, FBGN0036022, FBGN0036023, FBGN0035670, FBGN0036024, FBGN0039798, FBGN0035971, FBGN00150…
		INTERPRO	IPR018114:Peptidase S1, trypsin family, active site	36	1.53257	0.0146688	1429	186	10984	1.48771	1	0.396339	0.387876	FBGN0034052, FBGN0038479, FBGN0035003, FBGN0030776, FBGN0023197, FBGN0250815, FBGN0050187, FBGN0031249, FBGN0003863, FBGN0030775, FBGN0025378, FBGN0050289, FBGN0011556, FBGN0035665, FBGN0011555, FBGN0034776, FBGN0011834, FBGN0010425, FBGN0036022, FBGN0036023, FBGN0035670, FBGN0036024, FBGN0039798, FBGN0015001, FBGN0263234, FBGN0038482, FBGN0263235, FBGN0038481, FBGN0029827, FBGN0053127, FBGN00306…
		UP_KEYWORDS	Serine protease	30	1.27714	0.104575	2174	147	13921	1.30682	1	1	1	FBGN0034052, FBGN0038233, FBGN0038479, FBGN0023197, FBGN0250815, FBGN0050187, FBGN0031249, FBGN0003863, FBGN0025378, FBGN0050289, FBGN0011556, FBGN0035665, FBGN0011555, FBGN0011554, FBGN0010425, FBGN0036022, FBGN0036023, FBGN0035670, FBGN0036024, FBGN0039798, FBGN0015001, FBGN0038482, FBGN0038481, FBGN0029827, FBGN0030688, FBGN0051269, FBGN0010357, FBGN0259998, FBGN0040060, FBGN0010358
		UP_KEYWORDS	Disulfide bond	78	3.32056	0.999246	2174	670	13921	0.745471	1	1	1	FBGN0037100, FBGN0016123, FBGN0038479, FBGN0035003, FBGN0016122, FBGN0026403, FBGN0250815, FBGN0031249, FBGN0037906, FBGN0050289, FBGN0031929, FBGN0035886, FBGN0011556, FBGN0011555, FBGN0011554, FBGN0066101, FBGN0035887, FBGN0011834, FBGN0010425, FBGN0036022, FBGN0262728, FBGN0036023, FBGN0036024, FBGN0032144, FBGN0266801, FBGN0052373, FBGN0038482, FBGN0029827, FBGN0038481, FBGN0029826, FBGN02616…
12	2.42676	INTERPRO	IPR000048:IQ motif, EF-hand binding site	14	0.595998	0.00036381	1429	36	10984	2.98919	0.400252	0.0425961	0.0416865	FBGN0038000, FBGN0032075, FBGN0085434, FBGN0037454, FBGN0040299, FBGN0261397, FBGN0028857, FBGN0028856, FBGN0031191, FBGN0034826, FBGN0264695, FBGN0031575, FBGN0036931, FBGN0051735
		SMART	SM00015:IQ	9	0.383142	0.00329982	583	24	5218	3.35635	0.553576	0.100644	0.0969321	FBGN0034826, FBGN0038000, FBGN0031575, FBGN0040299, FBGN0261397, FBGN0036931, FBGN0028857, FBGN0028856, FBGN0051735
		GOTERM_MF_DIRECT	GO:0032027~myosin light chain binding	5	0.212857	0.043688	1095	12	9284	3.53272	1	0.67862	0.661144	FBGN0034826, FBGN0261397, FBGN0028857, FBGN0028856, FBGN0051735
13	2.42319	SMART	SM00631:Zn_pept	10	0.425713	0.000327089	583	22	5218	4.0683	0.0767199	0.0199524	0.0192165	FBGN0035718, FBGN0035781, FBGN0035780, FBGN0031929, FBGN0032144, FBGN0035776, FBGN0035777, FBGN0031930, FBGN0051019, FBGN0035779
		GOTERM_MF_DIRECT	GO:0004181~metallocarboxypeptidase activity	10	0.425713	0.000741833	1095	23	9284	3.68632	0.404726	0.0370155	0.0360623	FBGN0035718, FBGN0035781, FBGN0035780, FBGN0031929, FBGN0032144, FBGN0035776, FBGN0035777, FBGN0031930, FBGN0051019, FBGN0035779
		INTERPRO	IPR000834:Peptidase M14, carboxypeptidase A	10	0.425713	0.00152539	1429	23	10984	3.34195	0.882909	0.108377	0.106063	FBGN0035718, FBGN0035781, FBGN0035780, FBGN0031929, FBGN0032144, FBGN0035776, FBGN0035777, FBGN0031930, FBGN0051019, FBGN0035779
		INTERPRO	IPR003146:Proteinase inhibitor, carboxypeptidase propeptide	8	0.34057	0.0036657	1429	17	10984	3.61717	0.994257	0.143064	0.14001	FBGN0035718, FBGN0035781, FBGN0035780, FBGN0031929, FBGN0032144, FBGN0035777, FBGN0031930, FBGN0035779
		UP_KEYWORDS	Carboxypeptidase	14	0.595998	0.00366747	2174	38	13921	2.35915	0.609606	0.187775	0.187775	FBGN0035154, FBGN0035781, FBGN0035780, FBGN0016122, FBGN0032144, FBGN0052483, FBGN0035718, FBGN0031929, FBGN0035776, FBGN0035777, FBGN0035779, FBGN0031930, FBGN0051019, FBGN0032536
		INTERPRO	IPR009020:Proteinase inhibitor, propeptide	8	0.34057	0.0102817	1429	20	10984	3.0746	1	0.314039	0.307333	FBGN0035718, FBGN0035781, FBGN0035780, FBGN0031929, FBGN0032144, FBGN0035777, FBGN0031930, FBGN0035779
		UP_KEYWORDS	Metalloprotease	12	0.510856	0.213173	2174	54	13921	1.42298	1	1	1	FBGN0035718, FBGN0035781, FBGN0035780, FBGN0028950, FBGN0031929, FBGN0032144, FBGN0016122, FBGN0035777, FBGN0028945, FBGN0031930, FBGN0035779, FBGN0032536
14	2.40289	SMART	SM00477:NUC	6	0.255428	0.000712715	583	8	5218	6.71269	0.159673	0.0289838	0.0279147	FBGN0051682, FBGN0052463, FBGN0036321, FBGN0037857, FBGN0036831, FBGN0051679
		SMART	SM00892:SM00892	7	0.297999	0.00161623	583	13	5218	4.81937	0.326103	0.056337	0.054259	FBGN0033490, FBGN0051682, FBGN0052463, FBGN0036321, FBGN0037857, FBGN0036831, FBGN0051679
		INTERPRO	IPR020821:Extracellular Endonuclease, subunit A	7	0.297999	0.00362707	1429	13	10984	4.13888	0.993935	0.143064	0.14001	FBGN0033490, FBGN0051682, FBGN0052463, FBGN0036321, FBGN0037857, FBGN0036831, FBGN0051679
		INTERPRO	IPR001604:DNA/RNA non-specific endonuclease	7	0.297999	0.00362707	1429	13	10984	4.13888	0.993935	0.143064	0.14001	FBGN0033490, FBGN0051682, FBGN0052463, FBGN0036321, FBGN0037857, FBGN0036831, FBGN0051679
		GOTERM_BP_DIRECT	GO:0006309~apoptotic DNA fragmentation	4	0.170285	0.0638318	1186	9	10996	4.12067	1	1	0.990991	FBGN0051682, FBGN0052463, FBGN0037857, FBGN0051679
15	2.39564	INTERPRO	IPR004344:Tubulin-tyrosine ligase	7	0.297999	0.00123117	1429	11	10984	4.89141	0.822867	0.0960994	0.0940474	FBGN0026147, FBGN0052238, FBGN0039501, FBGN0031574, FBGN0034459, FBGN0031853, FBGN0030823
		GOTERM_MF_DIRECT	GO:0004835~tubulin-tyrosine ligase activity	5	0.212857	0.00500154	1095	7	9284	6.0561	0.969949	0.14567	0.141919	FBGN0026147, FBGN0052238, FBGN0039501, FBGN0031574, FBGN0034459
		GOTERM_BP_DIRECT	GO:0018095~protein polyglutamylation	4	0.170285	0.0105599	1186	5	10996	7.4172	0.999998	0.460863	0.456337	FBGN0026147, FBGN0052238, FBGN0031574, FBGN0030823
16	2.15206	INTERPRO	IPR011992:EF-hand-like domain	30	1.27714	0.000321047	1429	116	10984	1.98789	0.3631	0.0410064	0.0401308	FBGN0037461, FBGN0085464, FBGN0034592, FBGN0037462, FBGN0039029, FBGN0030691, FBGN0266417, FBGN0037460, FBGN0267449, FBGN0035161, FBGN0002773, FBGN0022160, FBGN0002772, FBGN0051958, FBGN0034774, FBGN0038089, FBGN0038744, FBGN0035034, FBGN0037358, FBGN0011286, FBGN0038280, FBGN0038163, FBGN0033190, FBGN0039373, FBGN0031410, FBGN0050378, FBGN0004580, FBGN0085390, FBGN0033238, FBGN0051802
		INTERPRO	IPR002048:EF-hand domain	24	1.02171	0.00202749	1429	95	10984	1.94185	0.942243	0.129483	0.126718	FBGN0037461, FBGN0038089, FBGN0037462, FBGN0034592, FBGN0038744, FBGN0039029, FBGN0037358, FBGN0038280, FBGN0038163, FBGN0033190, FBGN0037460, FBGN0039373, FBGN0035161, FBGN0002773, FBGN0022160, FBGN0002772, FBGN0263111, FBGN0050378, FBGN0051958, FBGN0004580, FBGN0034774, FBGN0085390, FBGN0033238, FBGN0051802
		GOTERM_MF_DIRECT	GO:0005509~calcium ion binding	38	1.61771	0.00762036	1095	210	9284	1.53421	0.995238	0.198128	0.193026	FBGN0037461, FBGN0034592, FBGN0037462, FBGN0039029, FBGN0039941, FBGN0038257, FBGN0026403, FBGN0037460, FBGN0035161, FBGN0028704, FBGN0002773, FBGN0022160, FBGN0002772, FBGN0003187, FBGN0037900, FBGN0051958, FBGN0034774, FBGN0040031, FBGN0066101, FBGN0013995, FBGN0038089, FBGN0038744, FBGN0035034, FBGN0037358, FBGN0011286, FBGN0038280, FBGN0052373, FBGN0038163, FBGN0033190, FBGN0039373, FBGN00041…
		SMART	SM00054:EFh	14	0.595998	0.0479116	583	71	5218	1.76484	0.999994	0.531383	0.511783	FBGN0037461, FBGN0037358, FBGN0037460, FBGN0039373, FBGN0035161, FBGN0002773, FBGN0022160, FBGN0050378, FBGN0051958, FBGN0004580, FBGN0034774, FBGN0085390, FBGN0033238, FBGN0051802
		INTERPRO	IPR018247:EF-Hand 1, calcium-binding site	17	0.723712	0.0730716	1429	84	10984	1.5556	1	0.982996	0.962007	FBGN0037461, FBGN0038089, FBGN0037462, FBGN0038744, FBGN0039029, FBGN0037358, FBGN0037460, FBGN0035161, FBGN0002773, FBGN0022160, FBGN0050378, FBGN0051958, FBGN0004580, FBGN0034774, FBGN0085390, FBGN0033238, FBGN0051802
17	2.03892	GOTERM_CC_DIRECT	GO:0030286~dynein complex	12	0.510856	7.0256e-05	1161	26	10026	3.98569	0.0209945	0.00707243	0.0069085	FBGN0028567, FBGN0035581, FBGN0028569, FBGN0036499, FBGN0028570, FBGN0032972, FBGN0033687, FBGN0026141, FBGN0001313, FBGN0035009, FBGN0063261, FBGN0028858
		SMART	SM00960:SM00960	5	0.212857	0.0121923	583	9	5218	4.97237	0.949874	0.212495	0.204657	FBGN0028567, FBGN0028569, FBGN0028570, FBGN0032972, FBGN0035009
		PIR_SUPERFAMILY	PIRSF009998:cytoplasmic dynein light chain, LC7 type	4	0.170285	0.0153898	101	5	806	6.38416	0.672634	0.554031	0.554031	FBGN0028567, FBGN0028570, FBGN0032972, FBGN0063261
		INTERPRO	IPR016561:Dynein light chain, roadblock-type	4	0.170285	0.0178856	1429	5	10984	6.1492	1	0.426831	0.417717	FBGN0028567, FBGN0028570, FBGN0032972, FBGN0063261
		GOTERM_MF_DIRECT	GO:0045505~dynein intermediate chain binding	6	0.255428	0.0180904	1095	14	9284	3.63366	0.999997	0.326184	0.317784	FBGN0028567, FBGN0028569, FBGN0036499, FBGN0028570, FBGN0032972, FBGN0035009
		INTERPRO	IPR004942:Dynein light chain-related	5	0.212857	0.0208563	1429	9	10984	4.27027	1	0.443986	0.434506	FBGN0028567, FBGN0028569, FBGN0028570, FBGN0032972, FBGN0035009
		GOTERM_CC_DIRECT	GO:0005868~cytoplasmic dynein complex	6	0.255428	0.0600302	1161	19	10026	2.72705	1	0.671448	0.655885	FBGN0028567, FBGN0028570, FBGN0067861, FBGN0032972, FBGN0052823, FBGN0063261
18	1.99842	INTERPRO	IPR020846:Major facilitator superfamily domain	42	1.78799	0.000101713	1429	175	10984	1.84476	0.133172	0.0204153	0.0199794	FBGN0037485, FBGN0037144, FBGN0037486, FBGN0034394, FBGN0015230, FBGN0043005, FBGN0038753, FBGN0038752, FBGN0051272, FBGN0260776, FBGN0083945, FBGN0053233, FBGN0031201, FBGN0030331, FBGN0053234, FBGN0033048, FBGN0028561, FBGN0038416, FBGN0028560, FBGN0033644, FBGN0034479, FBGN0032435, FBGN0038938, FBGN0034783, FBGN0063649, FBGN0031010, FBGN0052053, FBGN0262007, FBGN0052054, FBGN0053281, FBGN00339…
		GOTERM_MF_DIRECT	GO:0022857~transmembrane transporter activity	22	0.936569	0.000794323	1095	86	9284	2.16893	0.426188	0.0370155	0.0360623	FBGN0037485, FBGN0037144, FBGN0037486, FBGN0034394, FBGN0039525, FBGN0015230, FBGN0034783, FBGN0063649, FBGN0052053, FBGN0262007, FBGN0052054, FBGN0053281, FBGN0028513, FBGN0053233, FBGN0025684, FBGN0033234, FBGN0033048, FBGN0038416, FBGN0038448, FBGN0034479, FBGN0032435, FBGN0038938
		INTERPRO	IPR005828:General substrate transporter	17	0.723712	0.00279954	1429	59	10984	2.21475	0.98053	0.143064	0.14001	FBGN0037485, FBGN0037144, FBGN0037486, FBGN0015230, FBGN0063649, FBGN0052053, FBGN0262007, FBGN0052054, FBGN0053281, FBGN0053233, FBGN0028561, FBGN0038416, FBGN0038448, FBGN0028560, FBGN0033644, FBGN0034479, FBGN0038938
		INTERPRO	IPR005829:Sugar transporter, conserved site	11	0.468284	0.0169526	1429	37	10984	2.28517	1	0.426831	0.417717	FBGN0037485, FBGN0037144, FBGN0037486, FBGN0034394, FBGN0053233, FBGN0015230, FBGN0063649, FBGN0052053, FBGN0028560, FBGN0033644, FBGN0053281
		GOTERM_BP_DIRECT	GO:0035428~hexose transmembrane transport	6	0.255428	0.0565391	1186	20	10996	2.78145	1	1	0.990991	FBGN0037485, FBGN0037486, FBGN0015230, FBGN0028560, FBGN0033644, FBGN0053281
		GOTERM_BP_DIRECT	GO:0046323~glucose import	6	0.255428	0.0565391	1186	20	10996	2.78145	1	1	0.990991	FBGN0037485, FBGN0037486, FBGN0015230, FBGN0028560, FBGN0033644, FBGN0053281
		GOTERM_MF_DIRECT	GO:0005355~glucose transmembrane transporter activity	6	0.255428	0.0774832	1095	20	9284	2.54356	1	0.917979	0.89434	FBGN0037485, FBGN0037486, FBGN0015230, FBGN0028560, FBGN0033644, FBGN0053281
		GOTERM_MF_DIRECT	GO:0005351~sugar:proton symporter activity	6	0.255428	0.108396	1095	22	9284	2.31233	1	1	0.975645	FBGN0037485, FBGN0037486, FBGN0015230, FBGN0028560, FBGN0033644, FBGN0053281
19	1.90105	GOTERM_CC_DIRECT	GO:0009331~glycerol-3-phosphate dehydrogenase complex	7	0.297999	5.395e-05	1161	8	10026	7.5562	0.0161613	0.00707243	0.0069085	FBGN0022160, FBGN0033190, FBGN0001128, FBGN0263048, FBGN0013810, FBGN0034825, FBGN0028848
		GOTERM_BP_DIRECT	GO:0006072~glycerol-3-phosphate metabolic process	5	0.212857	0.00168328	1186	6	10996	7.72625	0.87238	0.137131	0.135784	FBGN0022160, FBGN0033190, FBGN0263048, FBGN0013810, FBGN0028848
		GOTERM_MF_DIRECT	GO:0004368~glycerol-3-phosphate dehydrogenase activity	4	0.170285	0.0135799	1095	5	9284	6.78283	0.999929	0.276118	0.269008	FBGN0022160, FBGN0033190, FBGN0013810, FBGN0028848
		INTERPRO	IPR000447:FAD-dependent glycerol-3-phosphate dehydrogenase	4	0.170285	0.0178856	1429	5	10984	6.1492	1	0.426831	0.417717	FBGN0022160, FBGN0033190, FBGN0013810, FBGN0028848
		GOTERM_MF_DIRECT	GO:0052591~sn-glycerol-3-phosphate:ubiquinone-8 oxidoreductase activity	4	0.170285	0.024796	1095	6	9284	5.65236	1	0.403079	0.3927	FBGN0022160, FBGN0033190, FBGN0013810, FBGN0028848
		COG_ONTOLOGY	Energy production and conversion	6	0.255428	0.236829	182	23	1239	1.77592	0.999483	0.925221	0.925221	FBGN0029722, FBGN0023507, FBGN0022160, FBGN0039737, FBGN0033190, FBGN0028848
		INTERPRO	IPR006076:FAD dependent oxidoreductase	3	0.127714	0.380427	1429	10	10984	2.30595	1	1	0.979345	FBGN0022160, FBGN0033190, FBGN0028848
20	1.87253	GOTERM_MF_DIRECT	GO:0016791~phosphatase activity	10	0.425713	0.00204506	1095	26	9284	3.26098	0.760921	0.0714749	0.0696344	FBGN0052488, FBGN0036760, FBGN0030347, FBGN0031335, FBGN0031333, FBGN0031332, FBGN0052487, FBGN0051924, FBGN0034713, FBGN0032779
		PIR_SUPERFAMILY	PIRSF000915:monoester phosphate phosphatase, PGP type	5	0.212857	0.0105371	101	8	806	4.98762	0.533594	0.554031	0.554031	FBGN0052488, FBGN0036760, FBGN0030347, FBGN0052487, FBGN0034713
		INTERPRO	IPR006357:HAD-superfamily hydrolase, subfamily IIA	5	0.212857	0.0208563	1429	9	10984	4.27027	1	0.443986	0.434506	FBGN0052488, FBGN0036760, FBGN0030347, FBGN0052487, FBGN0034713
		INTERPRO	IPR023215:Nitrophenylphosphatase-like domain	5	0.212857	0.0208563	1429	9	10984	4.27027	1	0.443986	0.434506	FBGN0052488, FBGN0036760, FBGN0030347, FBGN0052487, FBGN0034713
		INTERPRO	IPR006349:2-phosphoglycolate phosphatase, eukaryotic	3	0.127714	0.0462881	1429	3	10984	7.68649	1	0.730728	0.715125	FBGN0052488, FBGN0036760, FBGN0052487
21	1.83797	GOTERM_BP_DIRECT	GO:0006626~protein targeting to mitochondrion	12	0.510856	0.000119578	1186	29	10996	3.83648	0.135957	0.0146124	0.0144689	FBGN0033074, FBGN0038683, FBGN0030620, FBGN0031728, FBGN0038018, FBGN0011244, FBGN0020371, FBGN0032397, FBGN0037307, FBGN0036204, FBGN0037828, FBGN0032525
		GOTERM_BP_DIRECT	GO:0030150~protein import into mitochondrial matrix	10	0.425713	0.00108225	1186	26	10996	3.56596	0.733725	0.094465	0.0935373	FBGN0029964, FBGN0038355, FBGN0033074, FBGN0038683, FBGN0038018, FBGN0020371, FBGN0035124, FBGN0037307, FBGN0032971, FBGN0037828
		GOTERM_CC_DIRECT	GO:0005744~mitochondrial inner membrane presequence translocase complex	8	0.34057	0.00732236	1161	21	10026	3.28977	0.891335	0.201032	0.196372	FBGN0029964, FBGN0038683, FBGN0038018, FBGN0020371, FBGN0035124, FBGN0037307, FBGN0032971, FBGN0036204
		GOTERM_MF_DIRECT	GO:0015450~P-P-bond-hydrolysis-driven protein transmembrane transporter activity	8	0.34057	0.0138257	1095	23	9284	2.94906	0.999941	0.276118	0.269008	FBGN0033074, FBGN0038683, FBGN0038018, FBGN0020371, FBGN0032397, FBGN0037307, FBGN0036204, FBGN0037828
		UP_KEYWORDS	Translocation	6	0.255428	0.728488	2174	38	13921	1.01106	1	1	1	FBGN0038683, FBGN0038018, FBGN0035124, FBGN0037307, FBGN0032971, FBGN0036204
		UP_KEYWORDS	Protein transport	15	0.63857	0.982761	2174	142	13921	0.676416	1	1	1	FBGN0033074, FBGN0038683, FBGN0033692, FBGN0038018, FBGN0036497, FBGN0035124, FBGN0267727, FBGN0000256, FBGN0003475, FBGN0005586, FBGN0032971, FBGN0037307, FBGN0050118, FBGN0035657, FBGN0036204
22	1.7597	KEGG_PATHWAY	dme00052:Galactose metabolism	12	0.510856	0.000538941	295	34	2737	3.27458	0.0535023	0.00785313	0.00692924	FBGN0042711, FBGN0052445, FBGN0042710, FBGN0002571, FBGN0032372, FBGN0035147, FBGN0002570, FBGN0043783, FBGN0003071, FBGN0036183, FBGN0002569, FBGN0030525
		GOTERM_BP_DIRECT	GO:0006006~glucose metabolic process	8	0.34057	0.000788128	1186	16	10996	4.63575	0.618434	0.074084	0.0733565	FBGN0034173, FBGN0052445, FBGN0042710, FBGN0032372, FBGN0043783, FBGN0037147, FBGN0035999, FBGN0030525
		INTERPRO	IPR008183:Aldose 1-/Glucose-6-phosphate 1-epimerase	5	0.212857	0.00343137	1429	6	10984	6.40541	0.992008	0.143064	0.14001	FBGN0052445, FBGN0032372, FBGN0028540, FBGN0043783, FBGN0030525
		INTERPRO	IPR014718:Glycoside hydrolase-type carbohydrate-binding, subgroup	5	0.212857	0.00343137	1429	6	10984	6.40541	0.992008	0.143064	0.14001	FBGN0052445, FBGN0032372, FBGN0028540, FBGN0043783, FBGN0030525
		GOTERM_BP_DIRECT	GO:0019318~hexose metabolic process	4	0.170285	0.0105599	1186	5	10996	7.4172	0.999998	0.460863	0.456337	FBGN0042711, FBGN0052445, FBGN0032372, FBGN0043783
		GOTERM_BP_DIRECT	GO:0033499~galactose catabolic process via UDP-galactose	4	0.170285	0.0105599	1186	5	10996	7.4172	0.999998	0.460863	0.456337	FBGN0052445, FBGN0032372, FBGN0043783, FBGN0030525
		GOTERM_MF_DIRECT	GO:0004034~aldose 1-epimerase activity	4	0.170285	0.0135799	1095	5	9284	6.78283	0.999929	0.276118	0.269008	FBGN0052445, FBGN0032372, FBGN0043783, FBGN0030525
		INTERPRO	IPR011013:Galactose mutarotase-like domain	6	0.255428	0.0360478	1429	15	10984	3.0746	1	0.66641	0.65218	FBGN0052445, FBGN0032372, FBGN0028540, FBGN0043783, FBGN0032069, FBGN0030525
		GOTERM_MF_DIRECT	GO:0016853~isomerase activity	8	0.34057	0.0748719	1095	32	9284	2.11963	1	0.902336	0.8791	FBGN0052445, FBGN0032372, FBGN0028540, FBGN0043783, FBGN0034856, FBGN0052845, FBGN0038151, FBGN0030525
		PIR_SUPERFAMILY	PIRSF005096:aldose 1-epimerase	3	0.127714	0.0773447	101	4	806	5.98515	0.99696	1	1	FBGN0052445, FBGN0032372, FBGN0043783
		INTERPRO	IPR015443:Aldose 1-epimerase	3	0.127714	0.0846566	1429	4	10984	5.76487	1	0.982996	0.962007	FBGN0052445, FBGN0032372, FBGN0043783
		UP_KEYWORDS	Carbohydrate metabolism	7	0.297999	0.237264	2174	27	13921	1.66014	1	1	1	FBGN0052445, FBGN0032372, FBGN0035147, FBGN0043783, FBGN0037147, FBGN0004507, FBGN0032424
		GOTERM_MF_DIRECT	GO:0030246~carbohydrate binding	12	0.510856	0.418886	1095	85	9284	1.19697	1	1	0.975645	FBGN0052445, FBGN0040322, FBGN0032372, FBGN0031289, FBGN0028540, FBGN0043783, FBGN0032069, FBGN0034317, FBGN0051956, FBGN0030525, FBGN0038419, FBGN0034318
23	1.75848	SMART	SM00696:DM9	5	0.212857	0.0121923	583	9	5218	4.97237	0.949874	0.212495	0.204657	FBGN0265186, FBGN0265185, FBGN0036767, FBGN0036766, FBGN0033787
		INTERPRO	IPR006616:DM9 repeat	5	0.212857	0.0208563	1429	9	10984	4.27027	1	0.443986	0.434506	FBGN0265186, FBGN0265185, FBGN0036767, FBGN0036766, FBGN0033787
		INTERPRO	IPR024518:Domain of unknown function DUF3421	5	0.212857	0.0208563	1429	9	10984	4.27027	1	0.443986	0.434506	FBGN0265186, FBGN0265185, FBGN0036767, FBGN0036766, FBGN0033787
24	1.69462	INTERPRO	IPR023395:Mitochondrial carrier domain	17	0.723712	0.000302189	1429	49	10984	2.66674	0.345994	0.0410064	0.0401308	FBGN0037970, FBGN0039525, FBGN0037512, FBGN0035078, FBGN0038797, FBGN0032090, FBGN0036808, FBGN0031757, FBGN0032219, FBGN0029963, FBGN0031758, FBGN0036807, FBGN0035567, FBGN0032664, FBGN0035568, FBGN0037668, FBGN0033248
		INTERPRO	IPR018108:Mitochondrial substrate/solute carrier	17	0.723712	0.000302189	1429	49	10984	2.66674	0.345994	0.0410064	0.0401308	FBGN0037970, FBGN0039525, FBGN0037512, FBGN0035078, FBGN0038797, FBGN0032090, FBGN0036808, FBGN0031757, FBGN0032219, FBGN0029963, FBGN0031758, FBGN0036807, FBGN0035567, FBGN0032664, FBGN0035568, FBGN0037668, FBGN0033248
		INTERPRO	IPR002067:Mitochondrial carrier protein	7	0.297999	0.0368412	1429	20	10984	2.69027	1	0.668203	0.653936	FBGN0032219, FBGN0036808, FBGN0031757, FBGN0037970, FBGN0035078, FBGN0038797, FBGN0033248
		GOTERM_MF_DIRECT	GO:0003735~structural constituent of ribosome	18	0.766284	0.999979	1095	319	9284	0.478413	1	1	0.999979	FBGN0037970, FBGN0085211, FBGN0039525, FBGN0037512, FBGN0035078, FBGN0038797, FBGN0038281, FBGN0032090, FBGN0036808, FBGN0031757, FBGN0032219, FBGN0031758, FBGN0036807, FBGN0035567, FBGN0051913, FBGN0035568, FBGN0037668, FBGN0033248
		GOTERM_BP_DIRECT	GO:0006412~translation	18	0.766284	1	1186	601	10996	0.277682	1	1	1	FBGN0037970, FBGN0085211, FBGN0039525, FBGN0037512, FBGN0035078, FBGN0038797, FBGN0038281, FBGN0032090, FBGN0036808, FBGN0031757, FBGN0032219, FBGN0031758, FBGN0036807, FBGN0035567, FBGN0051913, FBGN0035568, FBGN0037668, FBGN0033248
25	1.68777	GOTERM_BP_DIRECT	GO:0046835~carbohydrate phosphorylation	6	0.255428	0.00884059	1186	13	10996	4.27915	0.999981	0.432128	0.427884	FBGN0042711, FBGN0042710, FBGN0031279, FBGN0036941, FBGN0036161, FBGN0036160
		GOTERM_MF_DIRECT	GO:0008865~fructokinase activity	5	0.212857	0.00907533	1095	8	9284	5.29909	0.998292	0.218747	0.213114	FBGN0042711, FBGN0042710, FBGN0036941, FBGN0036161, FBGN0036160
		KEGG_PATHWAY	dme00051:Fructose and mannose metabolism	8	0.34057	0.0205231	295	27	2737	2.74903	0.879383	0.123139	0.108652	FBGN0042711, FBGN0042710, FBGN0039425, FBGN0036941, FBGN0003071, FBGN0036161, FBGN0036183, FBGN0036160
		INTERPRO	IPR011611:Carbohydrate kinase PfkB	5	0.212857	0.0312439	1429	10	10984	3.84325	1	0.614018	0.600908	FBGN0037995, FBGN0036941, FBGN0036161, FBGN0032424, FBGN0036160
		GOTERM_MF_DIRECT	GO:0004454~ketohexokinase activity	3	0.127714	0.0707637	1095	4	9284	6.3589	1	0.883283	0.860538	FBGN0036941, FBGN0036161, FBGN0036160
26	1.65317	SMART	SM00703:NRF	7	0.297999	0.0078897	583	17	5218	3.6854	0.855246	0.192509	0.185408	FBGN0259229, FBGN0030148, FBGN0053337, FBGN0039091, FBGN0031034, FBGN0038873, FBGN0031033
		INTERPRO	IPR006621:Nose resistant-to-fluoxetine protein, N-terminal	7	0.297999	0.0165295	1429	17	10984	3.16503	1	0.426831	0.417717	FBGN0259229, FBGN0030148, FBGN0053337, FBGN0039091, FBGN0031034, FBGN0038873, FBGN0031033
		INTERPRO	IPR002656:Acyltransferase 3	7	0.297999	0.0288733	1429	19	10984	2.83187	1	0.587928	0.575375	FBGN0259229, FBGN0030148, FBGN0053337, FBGN0039091, FBGN0031034, FBGN0038873, FBGN0031033
		GOTERM_MF_DIRECT	GO:0016747~transferase activity, transferring acyl groups other than amino-acyl groups	8	0.34057	0.0647866	1095	31	9284	2.18801	1	0.883283	0.860538	FBGN0259229, FBGN0032715, FBGN0030148, FBGN0053337, FBGN0039091, FBGN0031034, FBGN0038873, FBGN0031033
27	1.43693	GOTERM_BP_DIRECT	GO:0035092~sperm chromatin condensation	5	0.212857	0.00359267	1186	7	10996	6.6225	0.9877	0.231065	0.228796	FBGN0013300, FBGN0013301, FBGN0037675, FBGN0086915, FBGN0039707
		INTERPRO	IPR024460:Protein of unknown function DUF1074	5	0.212857	0.0128987	1429	8	10984	4.80406	1	0.369852	0.361954	FBGN0013300, FBGN0013301, FBGN0051281, FBGN0259701, FBGN0039707
		GOTERM_BP_DIRECT	GO:0035093~spermatogenesis, exchange of chromosomal proteins	4	0.170285	0.0638318	1186	9	10996	4.12067	1	1	0.990991	FBGN0013300, FBGN0013301, FBGN0051281, FBGN0086915
		GOTERM_CC_DIRECT	GO:0000785~chromatin	8	0.34057	0.604346	1161	63	10026	1.09659	1	1	0.980066	FBGN0259922, FBGN0013300, FBGN0013301, FBGN0037675, FBGN0051281, FBGN0086915, FBGN0259876, FBGN0040290
28	1.40889	GOTERM_CC_DIRECT	GO:0009331~glycerol-3-phosphate dehydrogenase complex	7	0.297999	5.395e-05	1161	8	10026	7.5562	0.0161613	0.00707243	0.0069085	FBGN0022160, FBGN0033190, FBGN0001128, FBGN0263048, FBGN0013810, FBGN0034825, FBGN0028848
		GOTERM_BP_DIRECT	GO:0046168~glycerol-3-phosphate catabolic process	3	0.127714	0.0323171	1186	3	10996	9.2715	1	1	0.990991	FBGN0001128, FBGN0263048, FBGN0034825
		INTERPRO	IPR011128:Glycerol-3-phosphate dehydrogenase, NAD-dependent, N-terminal	3	0.127714	0.0462881	1429	3	10984	7.68649	1	0.730728	0.715125	FBGN0001128, FBGN0263048, FBGN0034825
		INTERPRO	IPR006109:Glycerol-3-phosphate dehydrogenase, NAD-dependent, C-terminal	3	0.127714	0.0462881	1429	3	10984	7.68649	1	0.730728	0.715125	FBGN0001128, FBGN0263048, FBGN0034825
		INTERPRO	IPR006168:Glycerol-3-phosphate dehydrogenase, NAD-dependent	3	0.127714	0.0462881	1429	3	10984	7.68649	1	0.730728	0.715125	FBGN0001128, FBGN0263048, FBGN0034825
		INTERPRO	IPR017751:Glycerol-3-phosphate dehydrogenase, NAD-dependent, eukaryotic	3	0.127714	0.0462881	1429	3	10984	7.68649	1	0.730728	0.715125	FBGN0001128, FBGN0263048, FBGN0034825
		GOTERM_MF_DIRECT	GO:0004367~glycerol-3-phosphate dehydrogenase [NAD+] activity	3	0.127714	0.0707637	1095	4	9284	6.3589	1	0.883283	0.860538	FBGN0001128, FBGN0263048, FBGN0034825
		INTERPRO	IPR013328:Dehydrogenase, multihelical	4	0.170285	0.100859	1429	9	10984	3.41622	1	1	0.979345	FBGN0001128, FBGN0263048, FBGN0034825, FBGN0034390
		INTERPRO	IPR008927:6-phosphogluconate dehydrogenase, C-terminal-like	4	0.170285	0.197657	1429	12	10984	2.56216	1	1	0.979345	FBGN0001128, FBGN0263048, FBGN0034825, FBGN0034390
		UP_KEYWORDS	NAD	9	0.383142	0.72164	2174	59	13921	0.97679	1	1	1	FBGN0034173, FBGN0039331, FBGN0035147, FBGN0036328, FBGN0031392, FBGN0001128, FBGN0263048, FBGN0034825, FBGN0034390
29	1.40017	GOTERM_CC_DIRECT	GO:0005744~mitochondrial inner membrane presequence translocase complex	8	0.34057	0.00732236	1161	21	10026	3.28977	0.891335	0.201032	0.196372	FBGN0029964, FBGN0038683, FBGN0038018, FBGN0020371, FBGN0035124, FBGN0037307, FBGN0032971, FBGN0036204
		GOTERM_MF_DIRECT	GO:0015450~P-P-bond-hydrolysis-driven protein transmembrane transporter activity	8	0.34057	0.0138257	1095	23	9284	2.94906	0.999941	0.276118	0.269008	FBGN0033074, FBGN0038683, FBGN0038018, FBGN0020371, FBGN0032397, FBGN0037307, FBGN0036204, FBGN0037828
		GOTERM_CC_DIRECT	GO:0031305~integral component of mitochondrial inner membrane	6	0.255428	0.0167981	1161	14	10026	3.701	0.994001	0.354721	0.346499	FBGN0026576, FBGN0038662, FBGN0038018, FBGN0020371, FBGN0037307, FBGN0037715
		INTERPRO	IPR005678:Mitochondrial inner membrane translocase complex, subunit Tim17	3	0.127714	0.177586	1429	6	10984	3.84325	1	1	0.979345	FBGN0038018, FBGN0020371, FBGN0037307
		INTERPRO	IPR003397:Mitochondrial inner membrane translocase subunit Tim17/Tim22/Tim23/peroxisomal protein PMP24	3	0.127714	0.33048	1429	9	10984	2.56216	1	1	0.979345	FBGN0038018, FBGN0020371, FBGN0037307
30	1.37707	SMART	SM00676:DM10	3	0.127714	0.0345021	583	3	5218	8.95026	0.99981	0.445468	0.429037	FBGN0028997, FBGN0034487, FBGN0030691
		INTERPRO	IPR010554:Protein of unknown function DUF1126	3	0.127714	0.0462881	1429	3	10984	7.68649	1	0.730728	0.715125	FBGN0028997, FBGN0034487, FBGN0030691
		INTERPRO	IPR006602:Uncharacterised domain DM10	3	0.127714	0.0462881	1429	3	10984	7.68649	1	0.730728	0.715125	FBGN0028997, FBGN0034487, FBGN0030691
31	1.37276	UP_SEQ_FEATURE	repeat:3	7	0.297999	0.0189512	228	30	3113	3.18582	0.999988	1	1	FBGN0010294, FBGN0003231, FBGN0011286, FBGN0003086, FBGN0010295, FBGN0085447, FBGN0019828
		UP_SEQ_FEATURE	repeat:1	7	0.297999	0.0382489	228	35	3113	2.7307	1	1	1	FBGN0010294, FBGN0003231, FBGN0011286, FBGN0003086, FBGN0010295, FBGN0085447, FBGN0019828
		UP_SEQ_FEATURE	repeat:2	7	0.297999	0.0382489	228	35	3113	2.7307	1	1	1	FBGN0010294, FBGN0003231, FBGN0011286, FBGN0003086, FBGN0010295, FBGN0085447, FBGN0019828
		UP_SEQ_FEATURE	repeat:4	5	0.212857	0.116435	228	26	3113	2.62567	1	1	1	FBGN0010294, FBGN0011286, FBGN0010295, FBGN0085447, FBGN0019828
32	1.33058	GOTERM_BP_DIRECT	GO:0006470~protein dephosphorylation	25	1.06428	0.000100322	1186	99	10996	2.34129	0.115383	0.0136216	0.0134878	FBGN0039421, FBGN0035143, FBGN0038655, FBGN0035004, FBGN0035124, FBGN0046698, FBGN0052488, FBGN0025573, FBGN0002673, FBGN0052487, FBGN0033322, FBGN0003140, FBGN0032971, FBGN0035426, FBGN0034713, FBGN0036760, FBGN0040963, FBGN0039694, FBGN0029949, FBGN0031294, FBGN0005779, FBGN0005778, FBGN0030347, FBGN0036369, FBGN0031952
		GOTERM_MF_DIRECT	GO:0004721~phosphoprotein phosphatase activity	16	0.681141	0.000344325	1095	49	9284	2.7685	0.213942	0.0299298	0.029159	FBGN0036760, FBGN0035143, FBGN0039694, FBGN0035004, FBGN0035124, FBGN0029949, FBGN0005779, FBGN0052488, FBGN0030347, FBGN0052487, FBGN0026061, FBGN0033322, FBGN0032971, FBGN0003140, FBGN0035426, FBGN0034713
		GOTERM_MF_DIRECT	GO:0004722~protein serine/threonine phosphatase activity	14	0.595998	0.001536	1095	45	9284	2.63777	0.658527	0.0603201	0.0587668	FBGN0039421, FBGN0035143, FBGN0039694, FBGN0035124, FBGN0046698, FBGN0029949, FBGN0005779, FBGN0005778, FBGN0025573, FBGN0033322, FBGN0032971, FBGN0003140, FBGN0035426, FBGN0031952
		INTERPRO	IPR004843:Metallophosphoesterase domain	8	0.34057	0.128123	1429	33	10984	1.86339	1	1	0.979345	FBGN0025573, FBGN0050103, FBGN0046698, FBGN0003140, FBGN0039769, FBGN0039768, FBGN0005779, FBGN0005778
		SMART	SM00156:PP2Ac	5	0.212857	0.154185	583	19	5218	2.35533	1	1	0.967078	FBGN0025573, FBGN0046698, FBGN0003140, FBGN0005779, FBGN0005778
		INTERPRO	IPR006186:Serine/threonine-specific protein phosphatase/bis(5-nucleosyl)-tetraphosphatase	5	0.212857	0.227407	1429	19	10984	2.02276	1	1	0.979345	FBGN0025573, FBGN0046698, FBGN0003140, FBGN0005779, FBGN0005778
		KEGG_PATHWAY	dme04931:Insulin resistance	7	0.297999	0.43292	295	49	2737	1.32542	1	0.981286	0.865841	FBGN0025573, FBGN0037365, FBGN0030696, FBGN0046332, FBGN0004507, FBGN0005779, FBGN0005778
		UP_KEYWORDS	Protein phosphatase	9	0.383142	0.553347	2174	51	13921	1.13001	1	1	1	FBGN0025573, FBGN0039421, FBGN0035143, FBGN0039694, FBGN0002673, FBGN0046698, FBGN0003140, FBGN0005779, FBGN0005778
		UP_KEYWORDS	Manganese	9	0.383142	0.908886	2174	74	13921	0.778792	1	1	1	FBGN0025573, FBGN0004852, FBGN0039694, FBGN0260481, FBGN0046698, FBGN0003140, FBGN0005779, FBGN0005778, FBGN0051956
		KEGG_PATHWAY	dme03015:mRNA surveillance pathway	5	0.212857	0.952941	295	70	2737	0.662712	1	1	0.952941	FBGN0025573, FBGN0051501, FBGN0038744, FBGN0005779, FBGN0005778
33	1.31766	SMART	SM00587:CHK	13	0.553427	0.00878951	583	51	5218	2.28144	0.883995	0.194967	0.187776	FBGN0039321, FBGN0039316, FBGN0039315, FBGN0028424, FBGN0032913, FBGN0051087, FBGN0051099, FBGN0025620, FBGN0053510, FBGN0053301, FBGN0051288, FBGN0037934, FBGN0036956
		INTERPRO	IPR015897:CHK kinase-like	13	0.553427	0.0277032	1429	51	10984	1.9593	1	0.572398	0.560176	FBGN0039321, FBGN0039316, FBGN0039315, FBGN0028424, FBGN0032913, FBGN0051087, FBGN0051099, FBGN0025620, FBGN0053510, FBGN0053301, FBGN0051288, FBGN0037934, FBGN0036956
		INTERPRO	IPR004119:Protein of unknown function DUF227	13	0.553427	0.0277032	1429	51	10984	1.9593	1	0.572398	0.560176	FBGN0039321, FBGN0039316, FBGN0039315, FBGN0028424, FBGN0032913, FBGN0051087, FBGN0051099, FBGN0025620, FBGN0053510, FBGN0053301, FBGN0051288, FBGN0037934, FBGN0036956
		INTERPRO	IPR011009:Protein kinase-like domain	35	1.49	0.794974	1429	294	10984	0.915059	1	1	0.979345	FBGN0038630, FBGN0039321, FBGN0037325, FBGN0032650, FBGN0039083, FBGN0028424, FBGN0005666, FBGN0032913, FBGN0000274, FBGN0030697, FBGN0046332, FBGN0051099, FBGN0053510, FBGN0053519, FBGN0031784, FBGN0032677, FBGN0052944, FBGN0052703, FBGN0036956, FBGN0039796, FBGN0038167, FBGN0036142, FBGN0039316, FBGN0039315, FBGN0032187, FBGN0025702, FBGN0030384, FBGN0267339, FBGN0000442, FBGN0051087, FBGN00256…
