# Supplementary material for: Inter-organ Wingless/Ror/Akt signaling regulates nutrient-dependent hyperarborization of somatosensory neurons
Source: eLife. 2023 Jan 17;12:e79461. doi: 10.7554/eLife.79461 (PMC9844989; doi:10.7554/eLife.79461)
Supplement: Supplementary file 4. [file elife-79461-supp4.xlsx]

## Sheet: (A) Statistical_details
(A) Statistical details of experiments. Statistical tests used, the exact sample size (n), and P values are shown.
Values of P < 0.05 were considered statistically different and are shown in blue font.
Figure	Test	Comparison (n: exact sample size)			P value
Fig. 1C	t-test	HYD (n = 6)	vs	LYD (n = 6)	0.0007921
Fig. 1D	t-test	HYD (n = 6)	vs	LYD (n = 6)	0.005598
Fig. 1E	t-test	HYD (n = 6)	vs	LYD (n = 6)	1.137e-05
Fig. 1K	ANOVA HSD	HYD (n = 8)	vs	LYD (n = 10)	0
		HYD (n = 8)	vs	LYD + VMCO (n = 10)	2.64e-05
		HYD (n = 8)	vs	LYD + VMCO + 1 x AAs (n = 10)	2.8e-06
		LYD (n = 10)	vs	LYD + VMCO (n = 10)	1.82e-05
		LYD (n = 10)	vs	LYD + VMCO + 1 x AAs (n = 10)	0.0001928
		LYD + VMCO (n = 10)	vs	LYD + VMCO + 1 x AAs (n = 10)	0.855076
Fig. 1R	Steel	LYD (n = 10)	vs	HYD (n = 10)	0.000339442
			vs	LYD + VMCO (n = 10)	0.00664096
			vs	LYD + MCO (n = 10)	0.98434
			vs	LYD + VCO (n = 10)	0.079169
			vs	LYD + VMO (n = 10)	0.548754
Fig. 1U	Steel	LYD (n = 8)	vs	HYD (n = 8)	0.00217399
			vs	LYD + VMCO (n = 8)	0.00656838
			vs	LYD + VMC (n = 8)	0.00921898
Fig.2H	2-way ANOVA	genotype : diet (n = 6)			0.00064
Fig.2J	2-way ANOVA	genotype : diet (n = 6)			0.000962623
Fig.2P	2-way ANOVA	genotype : diet (n = 8)			5.92955e-05
Fig.2V	2-way ANOVA	genotype : diet (n = 8)			1.35508e-10
Fig.3F	2-way ANOVA	genotype : diet (n = 6)			3.77947e-06
Fig.3L	2-way ANOVA	genotype : diet (n = 8)			2.0861e-07
Fig. 3P	Steel-Dwass	HYD (n = 18)	vs	LYD (n = 23)	0.000621225
		HYD (n = 18)	vs	LYD + VMC (n = 22)	0.306369
		LYD (n = 23)	vs	LYD + VMC (n = 22)	0.00455722
Fig. 3S	Mann-Whitney	HYD (n = 13)	vs	LYD (n = 15)	0.03669
Fig. 3Y	Mann-Whitney	Mhc > y w HYD (n = 8)	vs	Mhc > wg HYD (n = 10)	0.02665
		Mhc > y w LYD (n = 8)	vs	Mhc > wg LYD (n = 10)	0.02665
Fig. 4E	Mann-Whitney	ppk > y w HYD (n = 25)	vs	ppk > y w LYD (n = 28)	0.02384
		ppk > Ror RNAi LYD (n = 22)	vs	ppk > Ror RNAi LYD (n = 23)	0.001922
Fig. 4J	Mann-Whitney	Mhc > y w HYD (n = 17)	vs	Mhc > y w LYD (n = 18)	0.04865
		Mhc > wg HYD (n = 12)	vs	Mhc > wg LYD (n = 12)	1
Fig. 4V	Steel-Dwass	Control HYD (n = 8)	vs	Ror KD HYD (n = 8)	0.999586
		Control HYD (n = 8)	vs	myrAkt HYD (n = 8)	0.00884774
		Control HYD (n = 8)	vs	Ror KD, myrAkt HYD (n = 8)	0.032091
		Ror KD HYD (n = 8)	vs	myrAkt HYD (n = 8)	0.00884774
		Ror KD HYD (n = 9)	vs	Ror KD, myrAkt HYD (n = 8)	0.032091
		myrAkt HYD (n = 8)	vs	Ror KD, myrAkt HYD (n = 8)	0.922383
Fig. 4W	Steel-Dwass	Control LYD (n = 8)	vs	Ror KD LYD (n = 8)	0.00432534
		Control LYD (n = 8)	vs	myrAkt LYD (n = 8)	0.655149
		Control LYD (n = 8)	vs	Ror KD, myrAkt LYD (n = 8)	0.989176
		Ror KD LYD (n = 8)	vs	myrAkt LYD (n = 8)	0.0172615
		Ror KD LYD (n = 9)	vs	Ror KD, myrAkt LYD (n = 8)	0.00622264
		myrAkt LYD (n = 8)	vs	Ror KD, myrAkt LYD (n = 8)	0.23211
Fig. 5E	t-test	HYD (n = 27)	vs	LYD (n = 20)	0.001097
Fig. 5J	Mann-Whitney	Mhc > y w HYD (n = 20)	vs	Mhc > Stat92E RNAi HYD (n = 22)	0.003836
		Mhc > y w LYD (n = 17)	vs	Mhc > Stat92E RNAi LYD (n = 18)	0.8069
Fig. 5S	Mann-Whitney	Mhc > y w HYD (n = 8)	vs	Mhc > Stat92E RNAi HYD (n = 9)	0.0464
		Mhc > y w LYD (n = 8)	vs	Mhc > Stat92E RNAi LYD (n = 9)	0.4807
Fig. 5T	Mann-Whitney	Cg > y w HYD (n = 8)	vs	Mhc > hop RNAi HYD (n = 8)	0.004662
		Cg > y w LYD (n = 8)	vs	Mhc > hop RNAi LYD (n = 8)	0.2786
Fig.5Z	2-way ANOVA	genotype : diet (n = 8)			6.4e-07
Fig. 5AF	Mann-Whitney	Cg > y w HYD (n = 8)	vs	Cg > upd2 RNAi HYD (n = 8) 5988R-1	0.0003108
		Cg > y w LYD (n = 8)	vs	Cg > upd2 RNAi LYD (n = 8) 5988R-1	0.006993
Fig. 6D	Mann-Whitney	Control HYD (n = 15)	vs	Control LYD (n = 15)	0.001873
Fig. 6E	Mann-Whitney	Control HYD (n = 15)	vs	Control LYD (n = 15)	0.02395
Fig. 6F	Mann-Whitney	Control HYD (n = 15)	vs	Control LYD (n = 15)	0.0002643
Fig. 6G	Mann-Whitney	Control HYD (n = 15)	vs	Control LYD (n = 15)	4.404e-05
Fig. 6H	Mann-Whitney	Control HYD (n = 12)	vs	Control LYD (n = 12)	0.002009
		ppk > Ror RNAi HYD (n = 12)	vs	ppk > Ror RNAi LYD (n = 12)	0.1223
Fig. 6I	Mann-Whitney	Control HYD (n = 16)	vs	Control LYD (n = 16)	0.04628
		ppk > Ror RNAi HYD (n = 16)	vs	ppk > Ror RNAi LYD (n = 16)	0.9816
Fig.1-S1E	ANOVA HSD	HYD (n = 6)	vs	LYD (n = 6)	0.0001749
		HYD (n = 6)	vs	LYD + EAA (n = 6)	3.53e-05
		LYD (n = 6)	vs	LYD + EAA (n = 6)	0.656699
Fig.1-S1I	Steel	LYD (n = 8)	vs	HYD (n = 8)	0.00221989
			vs	LYD + 1 x AAs (n = 8)	0.00923198
			vs	LYD + 3 x AAs (n = 8)	0.00657279
Fig.1-S1L	ANOVA HSD	HYD (n = 8)	vs	LYD (n = 8)	3e-07
		HYD (n = 8)	vs	LYD + peptone (n = 8)	3.2e-06
		LYD (n = 8)	vs	LYD + peptone (n = 8)	0.541668
Fig.1-S2E	Steel-Dwass	HYD (n = 8)	vs	LYD (n = 8)	0.0022433
		HYD (n = 8)	vs	HYD + sucrose (n = 8)	0.17447
		LYD (n = 8)	vs	HYD + sucrose (n = 8)	0.0022433
Fig.1-S2L	Steel-Dwass	Control HYD (n = 8)	vs	Control LYD (n = 8)	0.0022433
		Control HYD (n = 8)	vs	rn > dilp8 HYD (n = 8)	0.678007
		Control LYD (n = 8)	vs	rn > dilp8 HYD (n = 8)	0.0022433
Fig.2-S1M	2-way ANOVA	genotype : diet (n = 6)			0.445
Fig.2-S1N	2-way ANOVA	genotype : diet (n = 6)			0.666
Fig.2-S1O	2-way ANOVA	genotype : diet (n = 6)			0.401
Fig.2-S1P	2-way ANOVA	genotype : diet (n = 6)			0.421
Fig.2-S1AF	2-way ANOVA	genotype : diet (n = 6)			0.00141
Fig.2-S1AG	2-way ANOVA	genotype : diet (n = 6)			6.64e-05
Fig.2-S1AH	2-way ANOVA	genotype : diet (n = 6)			0.0124
Fig.2-S1AI	2-way ANOVA	genotype : diet (n = 6)			0.387
Fig.2-S1AJ	2-way ANOVA	genotype : diet (n = 6)			0.000961
Fig.2-S2B	2-way ANOVA	genotype : diet (n = 8)			0.104
Fig.2-S2D	2-way ANOVA	genotype : diet (n = 8)			1.3e-05
Fig.2-S2F	2-way ANOVA	genotype : diet (n = 8)			0.000188
Fig.2-S3G	Steel-Dwass	Control HYD (n = 28)	vs	v2902 ppk > Akt RNAi HYD (n = 32)	0.0107769
		Control HYD (n = 28)	vs	BL33615 ppk > Akt RNAi HYD (n = 35)	1.5106e-07
		v2902 ppk > Akt RNAi HYD (n = 32)	vs	BL33615 ppk > Akt RNAi HYD (n = 35)	0.00548635
Fig.2-S3H	Steel-Dwass	Control LYD (n = 26)	vs	v2902 ppk > Akt RNAi LYD (n = 37)	0.0009718
		Control LYD (n = 26)	vs	BL33615 ppk > Akt RNAi LYD (n = 26)	1.31417e-06
		v2902 ppk > Akt RNAi LYD (n = 37)	vs	BL33615 ppk > Akt RNAi LYD (n = 26)	0.00501949
Fig.2-S5F	2-way ANOVA	genotype : diet (n = 6)			0.906
Fig.2-S5L	2-way ANOVA	genotype : diet (n = 6-7)			0.0341
Fig.2-S5P	2-way ANOVA	genotype : diet (n = 6)			2.18e-05
Fig.2-S5V	2-way ANOVA	genotype : diet (n = 6)			0.841
Fig.2-S5X	2-way ANOVA	genotype : diet (n = 6)			0.461
Fig.2-S5AF	2-way ANOVA	genotype : diet (n = 6)			5.92e-06
Fig.2-S5AH	2-way ANOVA	genotype : diet (n = 8)			0.0925
Fig.3-S1F	2-way ANOVA	genotype : diet (Control HYD: n = 4, Control LYD, mef2 > wg RNAi HYD, mef2 > wg RNAi LYD: n = 6)			0.00215
Fig.3-S1L	2-way ANOVA	genotype : diet (n = 6)			0.675521
Fig.3-S1Q	Mann-Whitney	Mhc > y w HYD (n = 13)	vs	Mhc > wg RNAi HYD (n = 13)	0.1014
		Mhc > y w LYD (n = 18)	vs	Mhc > wg RNAi LYD (n = 19)	1.378e-11
Fig.4-S1I	2-way ANOVA	genotype : diet (n = 8)			0.0092399
Fig.4-S1J	2-way ANOVA	genotype : diet (n = 8)			7.05304e-05
Fig.4-S1P	2-way ANOVA	genotype : diet (n = 8)			0.00212
Fig.4-S2U	2-way ANOVA	genotype : diet (n = 8)			5.13945e-05
Fig.4-S2V	2-way ANOVA	genotype : diet (n = 8)			5.23736e-07
Fig.4-S2W	2-way ANOVA	genotype : diet (n = 8)			0.0922142
Fig.4-S2X	2-way ANOVA	genotype : diet (n = 8)			0.121941
Fig.4-S2Y	2-way ANOVA	genotype : diet (n = 8)			0.0248738
Fig.4-S2Z	2-way ANOVA	genotype : diet (n = 8)			0.271605
Fig.4-S3C	Mann-Whitney	HYD (n = 16)	vs	LYD (n = 17)	0.7898
Fig.4-S3F	t-test	HYD (n = 11)	vs	LYD (n = 8)	0.004872
Fig.4-S3I	Mann-Whitney	HYD (n = 14)	vs	LYD (n = 16)	0.03827
Fig.5-S2O	Mann-Whitney	Mhc > y w HYD (n = 8)	vs	BL31318 Mhc > Stat92E RNAi HYD (n = 8)	0.01476
		Mhc > y w LYD (n = 8)	vs	BL31318 Mhc > Stat92E RNAi LYD (n = 8)	0.1949
Fig.5-S2P	Mann-Whitney	Mhc > y w HYD (n = 8)	vs	v106071 Mhc > dome RNAi HYD (n = 8)	0.04988
		Mhc > y w LYD (n = 8)	vs	v106071 Mhc > dome RNAi LYD (n = 8)	0.1949
Fig.5-S2Q	Mann-Whitney	Mhc > y w HYD (n = 8)	vs	BL32860 Mhc > dome RNAi HYD (n = 8)	0.8785
		Mhc > y w LYD (n = 8)	vs	BL32860 Mhc > dome RNAi LYD (n = 8)	0.1049
Fig.5-S2R	Mann-Whitney	Mhc > y w HYD (n = 8)	vs	BL34618 Mhc > dome RNAi HYD (n = 8)	0.6454
		Mhc > y w LYD (n = 8)	vs	BL34618 Mhc > dome RNAi LYD (n = 8)	0.9591
Fig.5-S2AJ	Mann-Whitney	Cg > y w HYD (n = 8)	vs	BL33680 Cg > upd RNAi HYD (n = 8)	0.5054
		Cg > y w LYD (n = 8)	vs	BL33680 Cg > upd RNAi LYD (n = 8)	0.03792
Fig.5-S2AK	Mann-Whitney	Cg > y w HYD (n = 8)	vs	v3282 Cg > upd RNAi HYD (n = 8)	0.6454
		Cg > y w LYD (n = 8)	vs	v3282 Cg > upd RNAi LYD (n = 8)	0.1605
Fig.5-S2AL	Mann-Whitney	Cg > y w HYD (n = 8)	vs	BL33949 Cg > upd2 RNAi HYD (n = 8)	0.0001554
		Cg > y w LYD (n = 8)	vs	BL33949 Cg > upd2 RNAi LYD (n = 8)	0.2786
Fig.5-S2AM	Mann-Whitney	Cg > y w HYD (n = 8)	vs	BL32859 Cg > upd3 RNAi HYD (n = 8)	0.1304
		Cg > y w LYD (n = 8)	vs	BL32859 Cg > upd3 RNAi LYD (n = 8)	0.1304
Fig.5-S2AN	Mann-Whitney	Cg > y w HYD (n = 8)	vs	BL28575 Cg > upd3 RNAi HYD (n = 8)	0.06496
		Cg > y w LYD (n = 8)	vs	BL28575 Cg > upd3 RNAi LYD (n = 8)	0.08298

## Sheet: (B) Genotype
(B) List of Drosophila genotypes used in each figure panel.
figure 1	+/ y w or Y; +/+; ppk-GAL4 UAS-mCD8:GFP/ +
figure 2A and 2B	y w/y w or Y; Gr28b.c-GAL4 UAS-mCD8:GFP/+; ppk-GAL4 UAS-mCD8:GFP/+
figure 2B and 2E	y w/w1118 or Y; Gr28b.c-GAL4 UAS-mCD8:GFP/+; ppk-GAL4 UAS-mCD8:GFP/P{GD1361}v2902
figure 2C and 2F	y w/y1 v1 or Y; Gr28b.c-GAL4 UAS-mCD8:GFP/+; ppk-GAL4 UAS-mCD8:GFP/P{TRiP.HMS00007}attP2
figure 2K and 2M	+/y w or Y; +/+; ppk-GAL4 UAS-mCD8:GFP/+
figure 2L and 2N	+/w1118 or Y; UAS-Ror RNAi4926/+; ppk-GAL4 UAS-mCD8:GFP/+
figure 2Q and 2S	y w/ y w or Y; +/+; ppk-CD4:tdGFP/ +
figure 2R and 2T	+/ y w or Y; Ror4/Ror4; ppk-CD4:tdGFP/+
figure 3A and 3C	y w/y w or Y; ppk-CD4:tdGFP/+; Mhc-GAL4/+
figure 3B and 3D	y w/w1118 or Y; ppk-CD4:tdGFP/+; Mhc-GAL4/P{GD5007}v13352
figure 3G and 3I	w*/y w or Y; +/+; ppk-CD4td:GFP/+
figure 3H and 3J	y w/+ or Y; apts78j wg1/wgl-8 cn1 bw1 sp1; ppk-CD4:tdGFP/+
figure 3M-O	y w/ y w or Y
figure 3Q and 3R	w1118/y w; TI{RFP[DsRed.3xP3.cUa]=CRISPaint.T2A-GAL4}wg[GP06461-1]/+; P{w[+mC]=UAS-RedStinger}6/+
figure 3T and 3V	y w/y w or Y; ppk-CD4:tdGFP/+; Mhc-GAL4/+
figure 3U and 3W	y w/w* or Y; ppk-CD4:tdGFP/P{w[+mC]=UAS-wg.H.T:HA1}3C; Mhc-GAL4/+
figure 4A and 4C	y w/y w or Y; ppk-CD4:tdTom/+; ppk-GAL4/+
figure 4B and 4D	y w/w* or Y ppk-CD4:tdTom/UAS-Ror RNAi4926; ppk-GAL4/+
figure 4F and 4H	+/y w or Y; Mhc-GAL4/+
figure 4G and 4I	+/w* or Y; P{w[+mC]=UAS-wg.H.T:HA1}3C/+; Mhc-GAL4/+
figure 4K and 4O	y w/y w or Y; P{GD12580}v43454/+; ppk-GAL4 UAS-mCD8:GFP/UAS-CD4:tdTom
figure 4L and 4P	y w/y w or Y; UAS-Ror RNAi4926/+; ppk-GAL4 UAS-mCD8:GFP/UAS-CD4:tdTom
figure 4M and 4Q	y w/y w or Y; P{GD12580}v43454/+; ppk-GAL4 UAS-mCD8:GFP/UAS-myrAkt
figure 4N and 4R	y w/y w or Y；UAS-Ror RNAi4926/+; ppk-GAL4 UAS-mCD8:GFP/UAS-myrAkt
figure 5A	+/y w or Y; +/+; ppk-GAL4 UAS-mCD8:GFP/+
figure 5C and 5D	w1118/w1118 orY; P{10XStat92E-GFP}1/+
figure 5F and 5H	+/y w or Y; Mhc-GAL4/+
figure 5G and 5I	+/ y1 v1 or Y; Mhc-GAL4/ P{TRiP.HMS00035}attP2
figure 5K and 5N	y w/y w or Y; ppk-CD4:tdGFP/+; Mhc-GAL4/+
figure 5L and 5O	y w/ y1 v1 or Y; ppk-CD4td:GFP/+; Mhc-GAL4/ P{TRiP.HMS00035}attP2
figure 5M and 5P	y w/ y1 sc* v1 sev21 or Y; ppk-CD4td:GFP/+; Mhc-GAL4/ P{TRiP.HMS00761}attP2
figure 5U and 5W	y w/y w or Y; ppk-CD4:tdGFP/+; Mhc-GAL4/+
figure 5V and 5X	y w/w* or Y; ppk-CD4:tdGFP/P{UAS-hop.H}2; Mhc-GAL4/+
figure 5AA and 5AC	y w/y w or Y; Cg-GAL4/+; ppk-CD4:tdGFP/+
figure 5AB and 5AD	y w/w1118 or Y; Cg-GAL4/UAS-upd2 RNAi5988; ppk-CD4:tdGFP/+
figure 6B-6G	+/y w or Y; Gr28b.c-GAL4 UAS-mCD8:GFP/+; ppk-GAL4 UAS-mCD8:GFP/+
figure 6H and 6I, Control	y w/ y w or Y; +/+; ppk-GAL4 UAS-mCD8:GFP/+
figure 6H and 6I, Ror KD	y w/ y w or Y; UAS-Ror RNAi4926/+; ppk-GAL4 UAS-mCD8:GFP/+
figure 1-supple 1	+/ y w or Y; +/+; ppk-GAL4 UAS-mCD8:GFP/ +
figure 1-supple 2A-2C	+/y w or Y; +/+; ppk-GAL4 UAS-mCD8:GFP/+
figure 1-supple 2F and 2G	w*/y w or Y; ppk-CD4td:GFP/+; rn-GAL4/+
figure 1-supple 2H	w*/y w or Y; ppk-CD4td:GFP/+; rn-GAL4/UAS-dilp8
figure 2-supple 1A and 1E	+/w1118 or Y; Gr28b.c-GAL4 UAS-mCD8:GFP/P{GD12580}v43454; ppk-GAL4 UAS-mCD8:GFP/+
figure 2-supple 1B and 1F	+/w1118 or Y; Gr28b.c-GAL4 UAS-mCD8:GFP/+; ppk-GAL4 UAS-mCD8:GFP/P{GD3427}v9152
figure 2-supple 1C and 1G	+/+ or Y; Gr28b.c-GAL4 UAS-mCD8:GFP/P{KK106399}VIE-260B; ppk-GAL4 UAS-mCD8:GFP/+
figure 2-supple 1D and 1H	+/w1118 or Y; Gr28b.c-GAL4 UAS-mCD8:GFP/+; ppk-GAL4 UAS-mCD8:GFP/P{TRiP.JF01953}attP2
figure 2-supple 1Q and 1V	+/y1 w* or Y; Gr28b.c-GAL4 UAS-mCD8:GFP/ P{UAS-Tor.TED}II; ppk-GAL4 UAS-mCD8:GFP/+
figure 2-supple 1R and 1W	+/w1118 or Y; Gr28b.c-GAL4 UAS-mCD8:GFP/ P{UAS-S6k.KQ}2; ppk-GAL4 UAS-mCD8:GFP/+
figure 2-supple 1S and 1X	+/w1118 or Y; Gr28b.c-GAL4 UAS-mCD8:GFP/+; ppk-GAL4 UAS-mCD8:GFP/P{GD9239}v20336
figure 2-supple 1T and 1Y	+/w1118 or Y; Gr28b.c-GAL4 UAS-mCD8:GFP/+; ppk-GAL4 UAS-mCD8:GFP/ P{GD12533}v35439
figure 2-supple 1U and 1Z	+/w1118 or Y; Gr28b.c-GAL4 UAS-mCD8:GFP/+; ppk-GAL4 UAS-mCD8:GFP/P{TRiP.HMS00422}attP2
figure 2-supple 2A and 2B Control	y w/y w or Y; Gr28b.c-GAL4 UAS-mCD8:GFP/+; ppk-GAL4 UAS-mCD8:GFP/+
figure 2-supple 2A and 2B Akt KD	y w/w1118 or Y; Gr28b.c-GAL4 UAS-mCD8:GFP/+; ppk-GAL4 UAS-mCD8:GFP/P{GD1361}v2902
figure 2-supple 2C and 2D Control	y w/y w or Y; Gr28b.c-GAL4 UAS-mCD8:GFP/+; ppk-GAL4 UAS-mCD8:GFP/+
figure 2-supple 2C and 2D Akt KD	y w/y1 v1 or Y; Gr28b.c-GAL4 UAS-mCD8:GFP/+; ppk-GAL4 UAS-mCD8:GFP/P{TRiP.HMS00007}attP2
figure 2-supple 2E and 2F Control	+/y w or Y; +/+; ppk-GAL4 UAS-mCD8:GFP/+
figure 2-supple 2E and 2F Ror KD	+/w1118 or Y; UAS-Ror RNAi4926/+; ppk-GAL4 UAS-mCD8:GFP/+
figure 2-supple 3A and 3D	y w/y w or Y; ppk-CD4:tdTom/+; ppk-GAL4/+
figure 2-supple 3B and 3E	y w/w1118 or Y; ppk-CD4:tdTom/+; ppk-GAL4/P{GD1361}v2902
figure 2-supple 3C and 3F	y w/y1 v1 or Y; ppk-CD4:tdTom/+; ppk-GAL4//P{TRiP.HMS00007}attP2
figure 2-supple 3I	y w/y w or Y; +/+; ppk-GAL4/+
figure 2-supple 3J	y w/w* or Y; +/+; ppk-GAL4/UAS-myrAkt
figure 2-supple 4A and 4B	+/y w or Y; Gr28b.c-Gal4 UAS-mCD8:GFP/+; ppk-Gal4 UAS-mCD8:GFP/+
figure 2-supple 4C and 4D	+/w1118 or Y; Gr28b.c-Gal4 UAS-mCD8:GFP/UAS-Ror RNAi4926; ppk-GAL4 UAS-mCD8:GFP/+
figure 2-supple 4E and 4F	+/w1118 or Y; Gr28b.c-Gal4 UAS-mCD8:GFP/P{GD84}v6692; ppk-GAL4 UAS-mCD8:GFP/+
figure 2-supple 4G and 4H	+/w1118 or Y; Gr28b.c-Gal4 UAS-mCD8:GFP/+; ppk-GAL4 UAS-mCD8:GFP/P{GD1654}v43267
figure 2-supple 4I and 4J	+/w1118 or Y; Gr28b.c-Gal4 UAS-mCD8:GFP/+; ppk-GAL4 UAS-mCD8:GFP/P{GD2571}v13502
figure 2-supple 4K and 4L	+/w1118 or Y; Gr28b.c-Gal4 UAS-mCD8:GFP/+; ppk-GAL4 UAS-mCD8:GFP/P{GD15146}v29720
figure 2-supple 4M and 4N	+/w1118 or Y; Gr28b.c-Gal4 UAS-mCD8:GFP/+; ppk-GAL4 UAS-mCD8:GFP/UAS-dnt RNAi17559
figure 2-supple 4O and 4P	+/y1 v1 or Y; Gr28b.c-Gal4 UAS-mCD8:GFP/+; ppk-GAL4 UAS-mCD8:GFP/P{TRiP.JF03281}attP2
figure 2-supple 4Q and 4R	+/y1 v1 or Y; Gr28b.c-Gal4 UAS-mCD8:GFP/+; ppk-GAL4 UAS-mCD8:GFP/P{TRiP.JF03131}attP2
figure 2-supple 4S and 4T	+/y1 v1 or Y; Gr28b.c-Gal4 UAS-mCD8:GFP/+; ppk-GAL4 UAS-mCD8:GFP/P{TRiP.JF01796}attP2
figure 2-supple 4U and 4V	+/y1 v1 or Y; Gr28b.c-Gal4 UAS-mCD8:GFP/+; ppk-GAL4 UAS-mCD8:GFP/P{TRiP.JF01215}attP2
figure 2-supple 4W and 4X	+/+ or Y; Gr28b.c-GAL4 UAS-mCD8:GFP/P{KK100331}VIE-260B; ppk-GAL4 UAS-mCD8:GFP/+
figure 2-supple 4Y and 4Z	+/w1118 or Y; Gr28b.c-Gal4 UAS-mCD8:GFP/+; ppk-GAL4 UAS-mCD8:GFP/P{GD155}v1089
figure 2-supple 4AA and 4AB	+/w1118 or Y; Gr28b.c-Gal4 UAS-mCD8:GFP/+; ppk-GAL4 UAS-mCD8:GFP/P{GD14370}v27052
figure 2-supple 4AC and 4AD	+/w1118 or Y; Gr28b.c-Gal4 UAS-mCD8:GFP/+; ppk-GAL4 UAS-mCD8:GFP/P{GD11105}v40484
figure 2-supple 4AE and 4AF	+/w1118 or Y; Gr28b.c-Gal4 UAS-mCD8:GFP/P{GD2540}v9653; ppk-GAL4 UAS-mCD8:GFP/+
figure 2-supple 4AG and 4AH	+/+ or Y; Gr28b.c-GAL4 UAS-mCD8:GFP/P{KK107206}VIE-260B; ppk-GAL4 UAS-mCD8:GFP/+
figure 2-supple 4AI and 4AJ	+/w1118 or Y; Gr28b.c-Gal4 UAS-mCD8:GFP/P{GD14396}v36280; ppk-GAL4 UAS-mCD8:GFP/+
figure 2-supple 4AK and 4AL	+/w1118 or Y; Gr28b.c-Gal4 UAS-mCD8:GFP/P{GD13190}v26879; ppk-GAL4 UAS-mCD8:GFP/+
figure 2-supple 5A and 5C	+/y w or Y; Gr28b.c-Gal4 UAS-mCD8:GFP/+; ppk-Gal4 UAS-mCD8:GFP/+
figure 2-supple 5B and 5D	+/y1 v1 or Y; Gr28b.c-Gal4 UAS-mCD8:GFP/+; ppk-GAL4 UAS-mCD8:GFP/P{TRiP.JF01183}attP2
figure 2-supple 5G and 5I	+/y w or Y; +/+; ppk-Gal4 UAS-mCD8:GFP/+
figure 2-supple 5H and 5J	+/y1 v1 or Y; P{TRiP.HMS03166}attP40/+; ppk-Gal4 UAS-mCD8:GFP/+
figure 2-supple 5M and 5N	w1118 P{GD42}v11446/+ or Y; Gr28b.c-Gal4 UAS-mCD8:GFP/+; ppk-Gal4 UAS-mCD8:GFP/+
figure 2-supple 5Q and 5S	w1118 P{GD42}v11446/+ or Y; ppk-Gal4 UAS-mCD8:GFP/+
figure 2-supple 5R and 5T	+/+ or Y; P{KK102942}VIE-260B/+; ppk-GAL4 UAS-mCD8:GFP/+
figure 2-supple 5Y and 5AB	+/y w or Y; +/+; ppk-Gal4 UAS-mCD8:GFP/+
figure 2-supple 5Z and 5AC	+/y1 v1 or Y; P{GD84}v6692/+; ppk-Gal4 UAS-mCD8:GFP/+
figure 2-supple 5AA and 5AD	+/y1 sc* v1 sev21 or Y; +/+; ppk-GAL4 UAS-mCD8:GFP/P{TRiP.HMS01437}attP2
figure 2-supple 6A and 6B	+/y w or Y; +/+; ppk-Gal4 UAS-mCD8:GFP/+
figure 2-supple 6C and 6D	+/w1118 or Y; +/+; ppk-GAL4 UAS-mCD8:GFP/P{GD1654}v43267
figure 2-supple 6E and 6F	+/w1118 or Y; +/+; ppk-GAL4 UAS-mCD8:GFP/P{GD2571}v13502
figure 2-supple 6G and 6H	+/w1118 or Y; +/+; ppk-GAL4 UAS-mCD8:GFP/P{GD15146}v29720
figure 2-supple 6I and 6J	+/w1118 or Y; +/+; ppk-GAL4 UAS-mCD8:GFP/UAS-dnt RNAi17559
figure 2-supple 6K and 6L	+/y1 v1 or Y; +/+; ppk-GAL4 UAS-mCD8:GFP/P{TRiP.JF03281}attP2
figure 3-supple 1A and 1C	y w/y w or Y; ppk-CD4:tdGFP/+; mef2-GAL4/+
figure 3-supple 1B and 1D	y w/w1118 or Y; ppk-CD4:tdGFP/+; mef2-GAL4/P{GD5007}v13352
figure 3-supple 1G and 1I	y w/y w or Y; ppk-CD4:tdGFP/+; P{GMR38F11-GAL4}attP2/+
figure 3-supple 1H and 1J	y w/w1118 or Y; ppk-CD4:tdGFP/+; P{GMR38F11-GAL4}attP2/P{GD5007}v13352
figure 3-supple 1M and 1O	+/y w or Y; Mhc-GAL4/+
figure 3-supple 1N and 1P	+/w1118 or Y; Mhc-GAL4/P{GD5007}v13352
figure 4-supple 1A and 1D	+/y w or Y; Gr28b.c-GAL4 UAS-mCD8:GFP/+; ppk-GAL4 UAS-mCD8:GFP/+
figure 4-supple 1B and 1E	+/w1118or Y; Gr28b.c-GAL4 UAS-mCD8:GFP/P{GD4614}v43075; ppk-GAL4 UAS-mCD8:GFP/+
figure 4-supple 1C and 1F	+/w1118 or Y; Gr28b.c-GAL4 UAS-mCD8:GFP/UAS-fz2 RNAi9739; ppk-GAL4 UAS-mCD8:GFP/+
figure 4-supple 1K and 1M	GAL45-40 UAS-Venus:pm SOP-FLP#42/ w* or Y; +/+; tubPGAL80 FRT2A/FRT2A
figure 4-supple 1L and 1N	GAL45-40 UAS-Venus:pm SOP-FLP#42/y w hs-flp or Y; +/+; tubPGAL80 FRT2A/ fz2C2 FRT2A
figure 4-supple 2A and 2H	+/y w or Y; Gr28b.c-GAL4 UAS-mCD8:GFP/+; ppk-GAL4 UAS-mCD8:GFP/+
figure 4-supple 2B and 2I	+/+ or Y; Gr28b.c-GAL4 UAS-mCD8:GFP/P{KK108967}VIE-260B; ppk-GAL4 UAS-mCD8:GFP/+
figure 4-supple 2C and 2J	w1118 P{UAS-bsk.DN}2/+ or Y; Gr28b.c-GAL4 UAS-mCD8:GFP/+; ppk-GAL4 UAS-mCD8:GFP/+
figure 4-supple 2D and 2K	+/w1118or Y; Gr28b.c-GAL4 UAS-mCD8:GFP/+; ppk-GAL4 UAS-mCD8:GFP/P{GD8382}v24885
figure 4-supple 2E and 2L	+/w1118or Y; Gr28b.c-GAL4 UAS-mCD8:GFP/+; ppk-GAL4 UAS-mCD8:GFP/ P{GD1372}v7767
figure 4-supple 2F and 2M	+/y1 v1 or Y; Gr28b.c-GAL4 UAS-mCD8:GFP/+; ppk-GAL4 UAS-mCD8:GFP/P{TRiP.JF01585}attP2
figure 4-supple 2G and 2N	+/y1 v1 or Y; Gr28b.c-GAL4 UAS-mCD8:GFP/+; ppk-GAL4 UAS-mCD8:GFP/P{TRiP.HM04012}attP2
figure 4-supple 3A and 3B	+/y w or Y; Mhc-GAL4/+
figure 4-supple 3D and 3E	y w / y w or Y; + / +; + / Gal419-12, UAS-mCD8GFP
figure 4-supple 3G and 3H	+/y w or Y; Mhc-GAL4/+
figure 5-supple 2A and 2F	y w/y w or Y; ppk-CD4:tdGFP/+; Mhc-GAL4/+
figure 5-supple 2B and 2G	y w/y1 v1 or Y; ppk-CD4:tdGFP/+; Mhc-GAL4/P{TRiP.JF01266}attP2
figure 5-supple 2C and 2H	+/+ or Y; Gr28b.c-GAL4 UAS-mCD8:GFP/P{KK104700}VIE-260B; ppk-GAL4 UAS-mCD8:GFP/+
figure 5-supple 2D and 2I	y w/y1 sc* v1 sev21 or Y; ppk-CD4:tdGFP/+; Mhc-GAL4/P{TRiP.HMS00647}attP2
figure 5-supple 2E and 2J	y w/y1 sc* v1 sev21 or Y; ppk-CD4:tdGFP/+; Mhc-GAL4/P{TRiP.HMS01293}attP2
figure 5-supple 2S and 2Y	y w/y w or Y; Cg-GAL4/+; ppk-CD4:tdGFP/+
figure 5-supple 2T and 2Z	y w/y1 sc* v1 sev21 or Y; Cg-GAL4/+; ppk-CD4:tdGFP/P{TRiP.HMS00545}attP2
figure 5-supple 2U and 2AA	y w/w1118 or Y; Cg-GAL4/P{GD1158}v3282; ppk-CD4:tdGFP/+
figure 5-supple 2V and 2AB	y w/y1 sc* v1 sev21 or Y; Cg-GAL4/+; ppk-CD4:tdGFP/P{TRiP.HMS00901}attP2
figure 5-supple 2W and 2AC	y w/y1 sc* v1 sev21 or Y; Cg-GAL4/+; ppk-CD4:tdGFP/P{TRiP.HMS00646}attP2
figure 5-supple 2X and 2AD	y w/y1 v1 or Y; Cg-GAL4/+; ppk-CD4:tdGFP/P{TRiP.HM05061}attP2
